# Supplementary material for: Reductive cleavage of the N–O bond: elemental sulfur-mediated conversion of N-alkoxyamides to amides
Source: Royal Society of Chemistry journal article supplement (doi:10.1039/c8qo01052h), 2018-12-14

## Electronic Supplementary Information

### Reductive Cleavage of N-O Bond: Elemental Sulfur-Mediated Conversion of *N*-Alkoxyamides to Amides

Senlin Wang,<sup>a</sup> Xue Zhao,<sup>a</sup> Daisy Zhang-Negrerie,<sup>a</sup> and Yunfei Du<sup>\*,a,b</sup>

<sup>a</sup> *Tianjin Key Laboratory for Modern Drug Delivery & High-Efficiency, School of Pharmaceutical Science and Technology, Tianjin University, Tianjin 300072, China.*

*Tel: +86-22-27406121; duyunfeier@tju.edu.cn.*

<sup>b</sup> *Collaborative Innovation Center of Chemical Science and Engineering (Tianjin), Tianjin 300072, China.*

*E-mail: duyunfeier@tju.edu.cn*

#### Table of contents

|                                                       |          |
|-------------------------------------------------------|----------|
| 1. General Information                                | S2       |
| 2. Experimental Section                               | S2-S4    |
| 3. Spectral Data of Substrates and Products           | S4-S20   |
| 4. References                                         | S20      |
| 5. <sup>1</sup> H-NMR and <sup>13</sup> C-NMR Spectra | S21-S101 |

## 1. General Information

All reactions were carried out at room temperature under air unless otherwise stated.  $^1\text{H}$  and  $^{13}\text{C}$  NMR spectra were recorded on a 600 MHz spectrometer (150 MHz for  $^{13}\text{C}$  NMR) at 25 °C. Chemical shift values were given in ppm and referred to the internal standard TMS set as 0.00 ppm. The peak patterns were indicated as follows: s, singlet; d, doublet; t, triplet; q, quartet; qui, quintet; m, multiplet; td, triplet of doublets; and dd, doublet of doublets. The coupling constants, J, are reported in Hertz (Hz). Melting points were determined with a micromelting point apparatus without corrections. Infrared spectra was recorded on dry compound using the TENSOR 27, BRUKER. TLC plates were visualized by UV fluorescence quenching and  $\text{KMnO}_4$  staining.

Reagents and solvents were purchased as reagent grade and were used without further purification. All reactions were performed in standard glassware and heated at 70 °C for 3 h before use. Flash column chromatography was performed over silica gel 200–300 mesh, and the eluent was a mixture of ethyl acetate (EA) and petroleum ether (PE).

## 2. Experimental Section

### 2.1 Preparation of Substrates 1

#### General procedure <sup>1</sup>

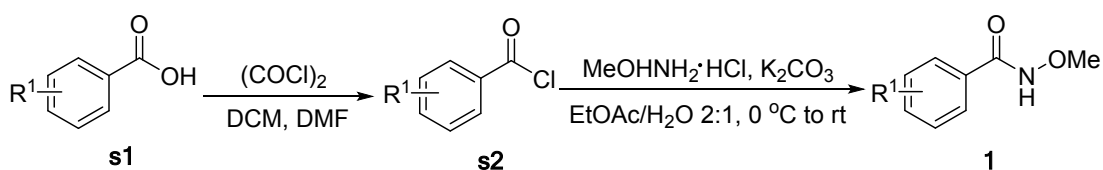

A dried round-bottom flask was charged with the acid (4.5 mmol), DCM (15 mL), and 2 drops of DMF. Then, oxalyl chloride (0.60 mL, d = 1.48, 0.876 g, 6.9 mmol) was added dropwise within 5 min at 0 °C. The resulting mixture was stirred at rt for 3.5 h and concentrated under reduced pressure. The residue was dissolved in EA (40 mL) and  $\text{K}_2\text{CO}_3$  (1.24 g, 9.0 mmol),  $\text{MeONH}_2\cdot\text{HCl}$  (458 mg, 5.4 mmol) and water (20 mL)

were added sequentially. The resulting mixture was stirred for 20 h at rt and extracted with EA (50 mL × 2). The organic layer was washed with saturated aqueous NaHCO<sub>3</sub> (15 mL × 2), brine (15 mL × 2), and dried over anhydrous Na<sub>2</sub>SO<sub>4</sub>, filtered and concentrated under reduced pressure. The crude product was recrystallized (EA) to afford the product. In the case of an oil, the crude product was purified by silica gel column chromatography, using EA/hexane as the eluent.

## 2.2 Preparation of Substrates 2

### General Procedure

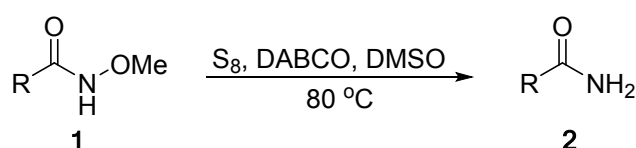

A mixture of *N*-methoxyamide **1** (1.0 equiv), S<sub>8</sub> (0.3 equiv) and DABCO (2.0 equiv) in DMSO (10 mL) was stirred at 80 °C. The reaction was monitored by TLC. After the reaction was completed, the reaction mixture was allowed to cool to room temperature. Then water (50 mL) was added, and the mixture was extracted with DCM (50 mL × 3). The combined organic mixture was washed with brine (30 mL × 2), and dried over anhydrous Na<sub>2</sub>SO<sub>4</sub>, filtered and concentrated under reduced pressure. The crude product was purified by silica gel column chromatography, using EA/Petroleum Ether (50/50) as the eluent.

## 2.3 Preparation of Mono-alkylation Alkoxyamides 6

### General Procedure <sup>2</sup>

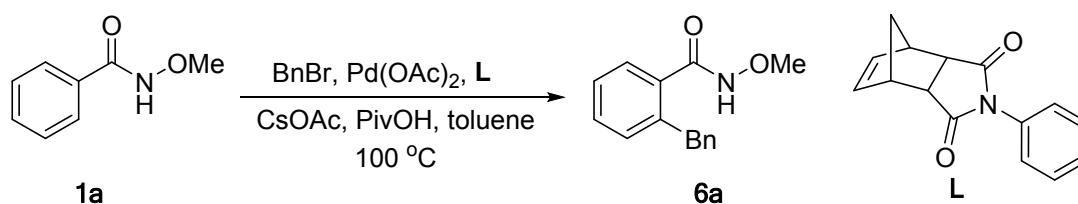

A solution of amide (0.2 mmol), alkyl halide (1.2 mmol), Pd(OAc)<sub>2</sub> (10 mol%), PivOH (0.4 mmol), CsOAc (0.6 mmol), L (0.2 mmol), toluene (2 mL) was heated in 100 °C under air. After the reaction completed, the reaction mixture was allowed to cool down to room temperature and saturated aqueous NaHCO<sub>3</sub> (20 mL) was added. The resulting mixture was extracted with EA (20 mL × 3). The organic layer was dried

over anhydrous  $\text{Na}_2\text{SO}_4$ , filtered and the solvent was removed under reduced pressure to provide the crude product. The purification was performed by flash column chromatography on silica gel.

### 3. Spectral Data of Substrates and Products

#### ***N*-Methoxybenzamide (1a)<sup>5</sup>**

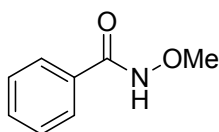

Following the general procedure, amide **1a** was isolated as a white solid. Yield: 80%; mp. 112-114 °C.  $^1\text{H}$  (600 MHz,  $\text{CDCl}_3$ )  $\delta$  9.72 (s, 1H), 7.78 – 7.75 (m, 2H), 7.50 – 7.46 (m, 1H), 7.40 – 7.35 (m, 2H), 3.90 – 3.70 (m, 3H).  $^{13}\text{C}$  (150 MHz,  $\text{CDCl}_3$ ),  $\delta$  166.0, 132.0, 131.7, 128.6, 127.2, 64.3.

#### ***N*-Methoxy-4-methylbenzamide (1b)<sup>5</sup>**

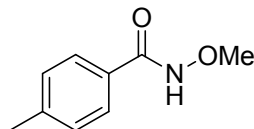

Following the general procedure, amide **1b** was isolated as a white solid. Yield: 85%; mp. 70-72 °C.  $^1\text{H}$  (600 MHz,  $\text{CDCl}_3$ )  $\delta$  7.65 (d,  $J$  = 8.2 Hz, 1H), 7.22 (d,  $J$  = 8.0 Hz, 1H), 3.86 (s, 1H), 2.38 (s, 1H).  $^{13}\text{C}$  (150 MHz,  $\text{CDCl}_3$ ),  $\delta$  166.3, 142.5, 129.2, 128.9, 127.2, 64.2, 21.5.

#### ***N*,4-Dimethoxybenzamide (1c)<sup>5</sup>**

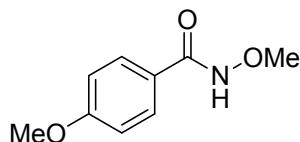

Following the general procedure, amide **1c** was isolated as a white solid. Yield: 89%; mp. 99-102 °C.  $^1\text{H}$  (600 MHz,  $\text{CDCl}_3$ )  $\delta$  7.76 – 7.70 (m, 2H), 6.90 (dd,  $J$  = 10.4 Hz, 7.7

Hz, 2H), 3.86 (s, 3H), 3.85 (s, 3H).  $^{13}\text{C}$  (150 MHz,  $\text{CDCl}_3$ ),  $\delta$  166.0, 162.7, 129.0, 123.8, 113.9, 64.5, 55.4.

#### 2-Chloro-*N*-methoxybenzamide (**1d**)<sup>6</sup>

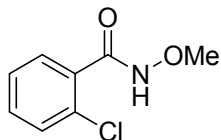

Following the general procedure, amide **1d** was isolated as a white solid. Yield: 70%; mp. 113-114 °C.  $^1\text{H}$  (600 MHz,  $\text{CDCl}_3$ )  $\delta$  9.01 – 8.56 (m, 1H), 7.64 (d,  $J$  = 7.0 Hz, 1H), 7.41 (dd,  $J$  = 6.7 Hz, 1.5Hz, 2H), 7.37 – 7.32 (m, 1H), 3.93 (s, 3H).  $^{13}\text{C}$  (150 MHz,  $\text{CDCl}_3$ )  $\delta$  164.4, 132.1, 131.9, 131.2, 130.3, 130.2, 127.1, 64.6.

#### 2-Iodo-*N*-methoxybenzamide (**1e**)<sup>6</sup>

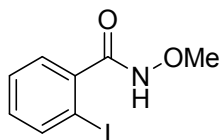

Following the general procedure, amide **1e** was isolated as a white solid. Yield: 91%; mp. 96-97 °C.  $^1\text{H}$  (600 MHz,  $\text{CDCl}_3$ )  $\delta$  8.53 (s, 1H), 7.86 (d,  $J$  = 8.0, 2H), 7.41 – 7.34 (m, 2H), 7.16 – 7.10 (m, 1H), 3.93 (s, 3H).  $^{13}\text{C}$  (150 MHz,  $\text{CDCl}_3$ )  $\delta$  165.8, 165.3, 164.2, 129.7, 129.6, 127.8, 127.8, 115.7, 115.6, 64.2.

#### *N*-Methoxy-2-nitrobenzamide (**1f**)

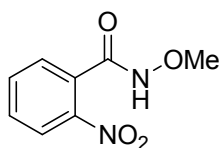

Following the general procedure, amide **1f** was isolated as a white solid. Yield: 91%; mp. 90-91 °C.  $^1\text{H}$  (600 MHz,  $\text{CDCl}_3$ ),  $\delta$  9.50 (s, 1H), 8.08 (d, 1H), 7.59 (m, 3H), 3.71 (m, 3H).  $^{13}\text{C}$  (150 MHz,  $\text{CDCl}_3$ ),  $\delta$  164.5, 146.4, 134.0, 133.9, 131.1, 129.5, 124.6, 64.1; HRMS (ESI)  $m/z$  calcd for  $\text{C}_8\text{H}_8\text{N}_2\text{NaO}_4^+$  [ $\text{M} + \text{Na}^+$ ] 219.0376, found 219.0357.

#### 4-Fluoro-*N*-methoxybenzamide (**1g**)<sup>5</sup>

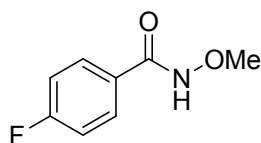

Following the general procedure, amide **1g** was isolated as a white solid. Yield: 91%; mp. 65-66 °C. <sup>1</sup>H (600 MHz, CDCl<sub>3</sub>) δ 8.52 (s, 1H), 7.85 – 7.66 (m, 2H), 7.09 (t, *J* = 7.9, 2H), 3.84 (s, 3H). <sup>13</sup>C (150 MHz, CDCl<sub>3</sub>), δ 165.8, 165.3, 164.2, 129.7, 129.6, 127.8, 127.8, 115.8, 115.6, 64.2.

#### 4-Bromo-*N*-methoxybenzamide (**1h**)<sup>5</sup>

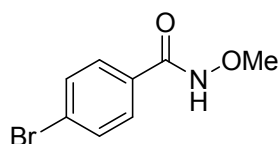

Following the general procedure, amide **1h** was isolated as a white solid. Yield: 89%; mp. 155-157 °C. <sup>1</sup>H (600 MHz, DMSO) δ 11.89 (s, 1H), 7.77 – 7.67 (m, 4H), 3.74 (s, 3H). <sup>13</sup>C (150 MHz, DMSO), δ 162.9, 131.5, 131.3, 129.1, 125.3, 63.2.

#### *N*-Methoxy-4-(trifluoromethyl)benzamide (**1i**)<sup>5</sup>

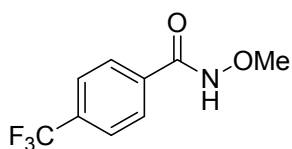

Following the general procedure, amide **1i** was isolated as a white solid. Yield: 78%; mp. 124-126 °C. <sup>1</sup>H (600 MHz, CDCl<sub>3</sub>) δ 7.87 (d, *J* = 8.1 Hz, 2H), 7.70 (d, *J* = 8.2 Hz, 2H), 3.91 (s, 3H). <sup>13</sup>C (150 MHz, CDCl<sub>3</sub>), δ 164.1, 134.8, 133.8, 133.5, 127.6, 125.7, 125.7, 125.6, 125.6, 124.4, 122.6, 64.3.

#### *N*, 3, 4-Trimethoxybenzamide (**1j**)<sup>5</sup>

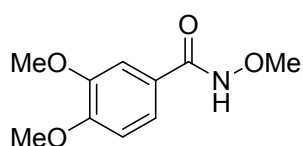

Following the general procedure, amide **1j** was isolated as a white solid. Yield: 86%; mp. 128-129 °C.  $^1\text{H}$  (600 MHz,  $\text{CDCl}_3$ )  $\delta$  7.37 (d,  $J = 1.9$  Hz, 1H ), 7.29 – 7.22 (m, 1H), 6.86 (d,  $J = 8.3$  Hz, 1H), 3.94 (s, 3H), 3.93 (s, 3H), 3.89 (s, 3H).  $^{13}\text{C}$  (150 MHz,  $\text{CDCl}_3$ ) ,  $\delta$  166.1, 152.2, 149.1, 124.1, 120.0, 110.4, 64.4, 56.0, 56.0.

### 2-Bromo-*N*-methoxy-5-methylbenzamide (**1k**)

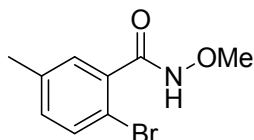

Following the general procedure, amide **1k** was isolated as a white solid. Yield: 93%; mp. 116-118 °C.  $^1\text{H}$  (600 MHz,  $\text{CDCl}_3$ )  $\delta$  8.55 (s, 1H), 7.46 (d,  $J = 8.2$  Hz, 1H), 7.34 (s, 1H), 7.12 (dd,  $J = 8.2$  Hz, 2.0 Hz, 1H ), 3.93 (s, 3H), 2.33 (s, 3H). C (150 Hz,  $\text{CDCl}_3$ ),  $\delta$  165.4, 137.8, 134.2, 133.1, 132.8, 130.6, 116.3, 64.6, 20.8. HRMS (ESI)  $m/z$  calcd for  $\text{C}_9\text{H}_{10}\text{BrNNaO}_2^+$  [ $\text{M} + \text{Na}^+$ ]265.9787, found 265.9767.

### 2-Bromo-5-chloro-*N*-methoxybenzamide (**1l**)

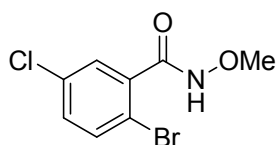

Following the general procedure, amide **1l** was isolated as a white solid. Yield: 89%; mp. 112-114 °C.  $^1\text{H}$  (600 MHz,  $\text{CDCl}_3$ )  $\delta$  9.05 (s, 1H), 7.50 (d,  $J = 8.6$  Hz, 1H), 7.43 (s, 1H), 7.27 (dd,  $J = 8.6$  Hz, 2.5 Hz, 1H ), 3.90 (s, 3H).  $^{13}\text{C}$  (150 MHz,  $\text{CDCl}_3$ ),  $\delta$  163.9, 135.9, 134.5, 133.9, 131.9, 129.8, 117.8, 64.6; HRMS (ESI)  $m/z$  calcd for  $\text{C}_8\text{H}_7\text{BrClNNaO}_2^+$  [ $\text{M} + \text{Na}^+$ ] 285.9241, found 285.9237.

### *N*, 3, 4, 5-Tetramethoxybenzamide (**1m**)

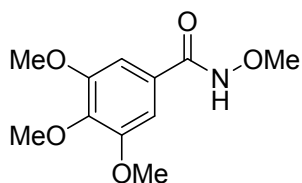

Following the general procedure, amide **1m** was isolated as a white solid. Yield: 91%; mp. 140-142 °C. <sup>1</sup>H (600 MHz, CDCl<sub>3</sub>) δ 6.98 (s, 2H), 3.89 (s, 6H), 3.88 (d, *J* = 1.7 Hz, 3H). <sup>13</sup>C (150 MHz, CDCl<sub>3</sub>), δ 165.9, 153.3, 141.4, 126.8, 104.4, 64.5, 60.9, 56.3. HRMS (ESI) *m/z* calcd for C<sub>11</sub>H<sub>15</sub>NNaO<sub>5</sub><sup>+</sup> [*M*+Na<sup>+</sup>] 264.0848, found 264.0826.

#### ***N*-Methoxy-1-naphthamide (1n)<sup>5</sup>**

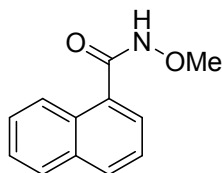

Following the general procedure, amide **1n** was isolated as a white solid. Yield: 91%; mp. 156-157 °C. <sup>1</sup>H (600 MHz, DMSO) δ 11.72 (s, 1H), 8.19 (d, *J* = 8.2 Hz, 1H), 8.05 (d, *J* = 8.2 Hz, 1H), 7.99 (d, *J* = 7.7 Hz, 1H), 7.60 (dt, *J* = 8.4 Hz, 6.7 Hz, 3H), 7.56 – 7.51 (m, 1H), 3.82 (s, 3H). <sup>13</sup>C (150 MHz, DMSO), δ 165.4, 133.1, 131.5, 130.4, 129.9, 128.3, 127.0, 126.4, 125.7, 124.9, 63.4.

#### ***N*-Methoxyfuran-2-carboxamide (1o)**

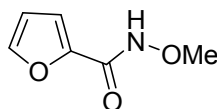

Following the general procedure, amide **1o** was isolated as a purple oil. <sup>1</sup>H (600 MHz, CDCl<sub>3</sub>) δ 8.96 (s, 1H), 7.45 (d, *J* = 1.0 Hz, 1H), 7.21 (d, *J* = 3.5 Hz, 1H), 6.53 (dd, *J* = 3.5 Hz, 1.7 Hz, 1H), 3.89 (s, 1H). <sup>13</sup>C (150 MHz, CDCl<sub>3</sub>), δ 157.5, 145.7, 144.4, 115.8, 112.1, 65.0. HRMS (ESI) *m/z* calcd for C<sub>6</sub>H<sub>7</sub>NNaO<sub>3</sub><sup>+</sup> (*M*+Na<sup>+</sup>) 164.0318; found 164.0305.

#### ***N*-Methoxythiophene-2-carboxamide (1p)<sup>7</sup>**

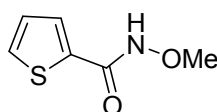



Following the general procedure, amide **1p** was isolated as a white solid. Yield: 70%; mp. 63-65 °C. <sup>1</sup>H (600 MHz, CDCl<sub>3</sub>) δ 9.82 (s, 1H), 7.75 (s, 1H), 7.52 (d, *J* = 4.8 Hz, 1H), 7.07 (dd, *J* = 4.8 Hz, 3.9 Hz, 1H ), 3.84 (s, 1H). <sup>13</sup>C (150 MHz, CDCl<sub>3</sub>), δ 161.8, 134.7, 131.1, 129.9, 127.7, 64.6.

#### ***N*-Methoxybenzofuran-2-carboxamide (1q)<sup>8</sup>**

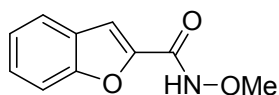

Following the general procedure, amide **1q** was isolated as a white solid. Yield: 70%; mp. 123-125 °C. <sup>1</sup>H (600 MHz, CDCl<sub>3</sub>) δ 9.49 (s, 1H), 7.68 – 7.59 (m, 1H), 7.55 (dd, *J* = 7.3 Hz, 1.3 Hz, 1H), 7.50 – 7.34 (m, 2H), 7.32 – 7.21 (m, 1H), 3.93 (dd, *J* = 8.2 Hz, 2.6 Hz, 3H). <sup>13</sup>C (150 MHz, CDCl<sub>3</sub>) δ 157.5, 154.8, 146.6, 127.3, 127.1, 123.9, 122.7, 111.8, 111.7, 64.9.

#### ***N*-Methoxy-2-phenylacetamide (1r)<sup>9</sup>**

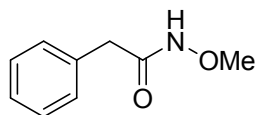

Following the general procedure, amide **1p** was isolated as a white solid. Yield: 93%; mp. 70-72 °C. <sup>1</sup>H (600 MHz, DMSO) δ 11.25 (1H, s), 7.30 (t, *J* = 7.5 Hz, 2H ), 7.24 (dd, *J* = 13.3 Hz, 7.2 Hz, 3H), 3.58 (s, 3H), 3.28 (s, 2H). <sup>13</sup>C (150 MHz, DMSO) δ 166.9, 135.5, 128.9, 128.3, 126.5, 99.5, 63.2.

#### **3-(2-Bromophenyl)-*N*-methoxypropanamide (1s)<sup>10</sup>**

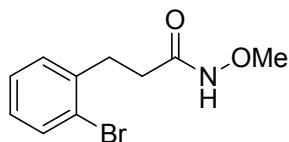

Following the general procedure, amide **1s** was isolated as a white solid. Yield: 87%; mp. 75-76 °C. <sup>1</sup>H (600 MHz, CDCl<sub>3</sub>) δ 7.53 (d, *J* = 7.9 Hz, 1H, ), 7.30 – 7.25 (m, 1H), 7.23 (t, *J* = 7.4 Hz, 1H ), 7.08 (td, *J* = 7.7 Hz, 1.7 Hz, 1H), 3.69 (s, 3H), 3.15 – 3.03 (m,

2H), 2.87 – 2.67 (m, 0.5H), 2.41 (s, 1.5H).  $^{13}\text{C}$  (150 MHz,  $\text{CDCl}_3$ )  $\delta$  169.7, 139.5, 132.9, 130.9, 128.2, 127.7, 124.2, 64.4, 32.9, 31.8.

#### ***N*-Methoxycinnamamide (**1t**)<sup>11</sup>**

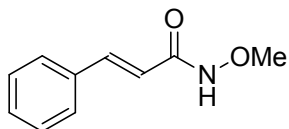

Following the general procedure, amide **1t** was isolated as a white solid. Yield: 90%; mp. 93-94 °C.  $^1\text{H}$  (600 MHz,  $\text{CDCl}_3$ )  $\delta$  7.74 (d,  $J = 15.3$  Hz, 1H), 7.49 (s, 2H), 7.31 (s, 3H), 6.60 (s, 1H), 3.84 (s, 3H).  $^{13}\text{C}$  (150 MHz,  $\text{CDCl}_3$ )  $\delta$  164.4, 141.8, 134.7, 130.0, 128.9, 128.0, 117.0, 64.4.

#### **Benzamide (**2a**)<sup>12</sup>**

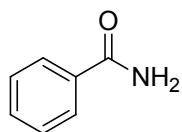

Following the general procedure, benzamide **2a** was isolated as a white solid. Yield: 85%; mp. 125-127 °C.  $^1\text{H}$  (600 MHz,  $\text{CDCl}_3$ )  $\delta$  7.82 (dd,  $J = 8.3$  Hz, 1.2 Hz, 2H), 7.54 (dd,  $J = 10.7$  Hz, 4.2 Hz, 1H), 7.46 (t,  $J = 7.7$  Hz, 2H), 6.09 (d, 1H), 6.18 (s, 1H), 5.99 (s, 1H).

#### **4-Methylbenzamide (**2b**)<sup>12</sup>**

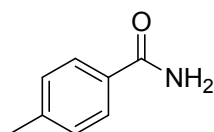

Following the general procedure, **2b** was isolated as a white solid. Yield: 85%; mp. 160-162 °C.  $^1\text{H}$  (600 MHz,  $\text{CDCl}_3$ )  $\delta$  7.72 (d,  $J = 8.2$  Hz, 2H), 7.26 (d,  $J = 7.5$  Hz, 2H), 6.08 (s, 1H), 5.69 (s, 1H), 2.41 (s, 3H).

#### **4-Methoxybenzamide (**2c**)<sup>13</sup>**

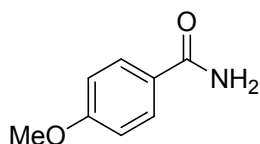

Following the general procedure, **2c** was isolated as a white solid. Yield: 82%; mp. 155-157 °C.  $^1\text{H}$  (600 MHz,  $\text{CDCl}_3$ )  $\delta$  7.79 (d,  $J = 8.8$  Hz, 2H ), 6.94 (d,  $J = 8.8$  Hz, 2H), 6.21 – 5.51 (m, 2H), 3.86 (s, 3H).

#### 2-Chlorobenzamide (**2d**)<sup>14</sup>

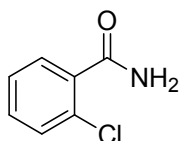

Following the general procedure, **2d** was isolated as a white solid. Yield: 77%; mp. 138-139 °C.  $^1\text{H}$  (600 MHz,  $\text{CDCl}_3$ )  $\delta$  7.81 (dd,  $J = 7.6$  Hz, 1.6 Hz, 1H), 7.46 – 7.41 (m, 1H), 7.42 (d,  $J = 1.6$  Hz, 1H ), 7.36 (td,  $J = 7.4$  Hz, 1.3 Hz, 1H), 6.37 (s, 1H), 5.94 (s, 1H).

#### 2-Iodobenzamide (**2e**)

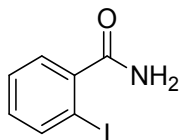

Following the general procedure, **2e** was isolated as a white solid. Yield: 76%; mp. 185-187 °C.  $^1\text{H}$  (600 MHz,  $\text{CDCl}_3$ )  $\delta$  7.90 (d,  $J = 7.9$  Hz, 1H), 7.48 (dd,  $J = 7.6$  Hz, 1.4 Hz, 1H), 7.40 (t,  $J = 7.5$  Hz, 1H), 7.13 (td,  $J = 7.8$  Hz, 1.4 Hz, 1H), 5.89 (s, 1H), 5.85 (s, 1H).

#### 2-Nitrobenzamide (**2f**)<sup>14</sup>

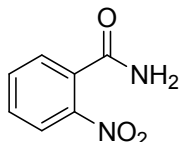

Following the general procedure, **2f** was isolated as a white solid. Yield: 94%; mp. 175-177 °C.  $^1\text{H}$  (600 MHz,  $\text{CDCl}_3$ )  $\delta$  8.09 (d,  $J = 8.2$  Hz, 1H ), 7.71 (td,  $J = 7.5$  Hz, 1.0 Hz, 1H ), 7.65 – 7.59 (m, 2H), 5.83 (s, 2H).

#### 4-Fluorobenzamide (**2g**)<sup>13</sup>

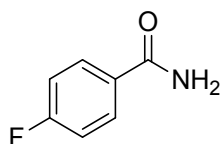

Following the general procedure, **2g** was isolated as a white solid. Yield: 90%; mp. 155-156 °C.  $^1\text{H}$  (600 MHz,  $\text{CDCl}_3$ )  $\delta$  7.84 (dd,  $J = 8.8$  Hz, 5.3 Hz, 2H), 7.13 (t,  $J = 8.6$  Hz, 2H), 6.08 (s, 1H), 5.92 (s, 1H).

#### 4-Bromobenzamide (**2h**)<sup>12</sup>

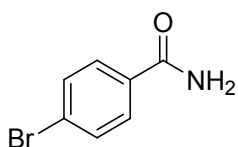

Following the general procedure, **2h** was isolated as a white solid. Yield: 70%; mp. 187-191 °C.  $^1\text{H}$  (600 MHz,  $\text{CDCl}_3$ )  $\delta$  7.71 – 7.67 (2 H, m), 7.62 – 7.59 (2 H, m), 6.06 (1 H, s), 5.73 (1 H, s).

#### 4-(Trifluoromethyl)benzamide (**2i**)<sup>14</sup>

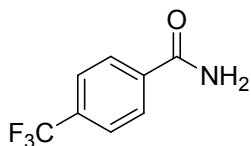

Following the general procedure, **2i** was isolated as a white solid. Yield: 80%; mp. 183-185 °C.  $^1\text{H}$  (600 MHz,  $\text{CDCl}_3$ )  $\delta$  7.93 (d,  $J = 8.1$  Hz, 1H), 7.73 (d,  $J = 8.1$  Hz, 1H), 6.13 (s, 1H), 5.81 (s, 1H).

#### 3,4-Dimethoxybenzamide (**2j**)<sup>13</sup>

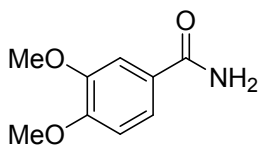

Following the general procedure, **2j** was isolated as a white solid. Yield: 82%; mp. 164-165 °C.  $^1\text{H}$  (600 MHz,  $\text{CDCl}_3$ )  $\delta$  7.47 (d,  $J = 1.9$  Hz, 1H), 7.34 (dd,  $J = 8.3$  Hz, 2.0 Hz, 1H), 6.89 (d,  $J = 8.3$  Hz, 1H), 6.11 (s, 1H), 5.70 (s, 1H), 3.95 (s, 3H), 3.94 (s, 3H).

#### 2-Bromo-5-methylbenzamide (**2k**)<sup>15</sup>

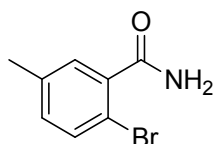

Following the general procedure, **2k** was isolated as a white solid. Yield: 80%; mp. 197-199 °C.  $^1\text{H}$  (600 MHz,  $\text{CDCl}_3$ )  $\delta$  7.48 (d,  $J = 2.7$  Hz, 1H), 7.48 (d,  $J = 3.8$  Hz, 1H), 7.11 (dd,  $J = 8.2$  Hz, 1.8 Hz, 1 H), 6.18 (s, 1H), 6.09 (s, 1H), 2.34 (s, 3H).

### 2-Bromo-5-chlorobenzamide (**2l**)

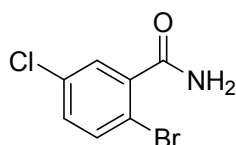

Following the general procedure, **2l** as isolated as a white solid. Yield: 76%; mp. 160-162 °C.  $^1\text{H}$  (600 MHz,  $\text{CDCl}_3$ )  $\delta$  7.64 (d,  $J = 2.6$  Hz, 1H), 7.55 (d,  $J = 8.5$  Hz, 1H), 7.29 (dd,  $J = 8.5$  Hz, 2.6 Hz, 1H), 6.13 (s, 1H), 5.99 (s, 1H). HRMS (ESI)  $m/z$  calcd for  $\text{C}_7\text{H}_5\text{BrClINNaO}^+$  ( $M + \text{Na}^+$ ) 255.9135; found 255.9130.

### 3,4,5-Trimethoxybenzamide (**2m**)<sup>12</sup>

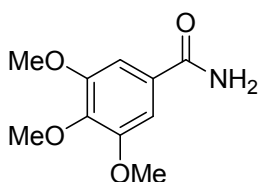

Following the general procedure, **2m** as isolated as a white solid. Yield: 85%; mp. 173-174 °C.  $^1\text{H}$  (600 MHz,  $\text{CDCl}_3$ )  $\delta$  7.05 (s, 2H), 6.07 (s, 1H), 5.73 (s, 1H), 3.92 (s, 6H), 3.90 (s, 3H).

### $\alpha$ -Naphthamide (**2n**)<sup>12</sup>

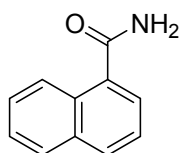

Following the general procedure, **2n** was isolated as a white solid. Yield: 83%; mp. 197-199 °C.  $^1\text{H}$  (600 MHz,  $\text{CDCl}_3$ )  $\delta$  8.42 (d,  $J = 8.4$  Hz, 1H), 7.96 (d,  $J = 8.3$  Hz, 1H), 7.89 (d,  $J = 7.9$  Hz, 1H), 7.72 (dd,  $J = 7.0$  Hz, 0.9 Hz, 1H), 7.59 (ddd,  $J = 8.4$  Hz, 6.9 Hz, 1.3 Hz, 1H), 7.56 – 7.51 (m, 1H), 7.48 (dd,  $J = 8.1$  Hz, 7.2 Hz, 1H), 6.08 (s, 2H).

#### Furan-2-carboxamide (**2o**)<sup>13</sup>

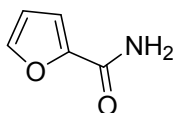

Following the general procedure, **2o** was isolated as a white solid. Yield: 76%; mp. 140-141 °C.  $^1\text{H}$  (600 MHz, DMSO)  $\delta$  7.81 (dd,  $J = 1.6$  Hz, 0.7 Hz, 1H), 7.78 (s, 1H), 7.38 (s, 1H), 7.10 (dd,  $J = 3.4$  Hz, 0.6 Hz, 1H), 6.60 (dd,  $J = 3.4$  Hz, 1.7 Hz, 1H).

#### Thiophene-2-carboxamide (**2p**)<sup>12</sup>

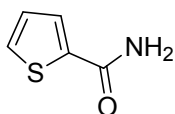

Following the general procedure, **2p** was isolated as a white solid. Yield: 81%; mp. 190-191 °C.  $^1\text{H}$  (600 MHz,  $\text{CDCl}_3$ )  $\delta$  7.57 – 7.55 (m, 1H), 7.54 (d,  $J = 5.0$  Hz, 1H), 7.10 (dt,  $J = 12.0$  Hz, 6.0 Hz, 1H), 5.85 (s, 2H).

#### Benzofuran-2-carboxamide (**2q**)<sup>16</sup>

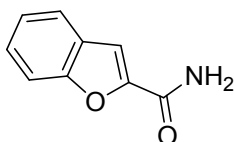

Following the general procedure, **2q** was isolated as a white solid. Yield: 85%; mp. 155-157 °C.  $^1\text{H}$  (600 MHz,  $\text{CDCl}_3$ )  $\delta$  7.69 (d,  $J = 7.9$  Hz, 1H), 7.52 (d,  $J = 7.1$  Hz, 2H), 7.44 (t,  $J = 7.8$  Hz, 1H), 7.31 (t,  $J = 7.5$  Hz, 1H), 6.57 (s, 1H), 6.04 (s, 1H).

#### *N*-Methoxy-2-phenylacetamide (**2r**)<sup>17</sup>

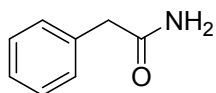

Following the general procedure, **2r** was isolated as a white solid. Yield: 70%; mp. 154-156 °C.  $^1\text{H}$  (600 MHz,  $\text{CDCl}_3$ )  $\delta$  7.37 (t,  $J = 7.4$  Hz, 2H), 7.31 (t,  $J = 4.7$  Hz, 1H), 7.30 – 7.27 (m, 2H), 5.69 (s, 1H), 5.40 (s, 1H), 3.59 (s, 2H).

### 3-(2-Bromophenyl)-*N*-methoxypropanamide (**2s**)<sup>18</sup>

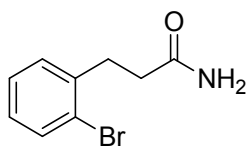

Following the general procedure, **2s** was isolated as a white solid. Yield: 77%; mp. 105-107 °C.  $^1\text{H}$  (600 MHz,  $\text{CDCl}_3$ )  $\delta$  7.54 (dd,  $J = 8.0$  Hz, 1.0 Hz, 1H), 7.28 (dd,  $J = 7.6$  Hz, 1.7 Hz, 1H), 7.24 (td,  $J = 7.5$  Hz, 1.1 Hz, 1H), 7.09 (td,  $J = 7.7$  Hz, 1.8 Hz, 1H), 5.55 (s, 1H), 5.43 (s, 1H), 3.37 – 2.89 (m, 2H), 2.74 – 2.33 (m, 2H).

### *N*-Cinnamamide (**2t**)<sup>17</sup>

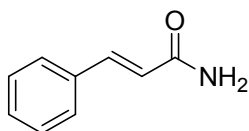

Following the general procedure, **2t** was isolated as a white solid. Yield: 88%; mp. 145-147 °C.  $^1\text{H}$  (600 MHz,  $\text{CDCl}_3$ )  $\delta$  7.66 (d,  $J = 15.7$  Hz, 1 H), 7.52 (dd,  $J = 6.5$  Hz, 3.0 Hz, 2H), 7.39 (dd,  $J = 5.0$  Hz, 1.9 Hz, 3H), 6.47 (d,  $J = 15.7$  Hz, 1H), 5.69 (s, 1H).

### *N*-(Benzyloxy)benzamide (**3a**)<sup>5</sup>

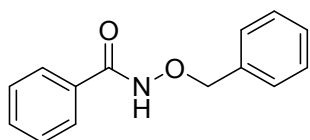

Following the modified procedure, **3a** was isolated as a white solid. Yield: 78%; m.p. 107-110 °C.  $^1\text{H}$  (600 MHz,  $\text{CDCl}_3$ )  $\delta$  7.67 (d,  $J = 7.5$  Hz, 1H), 7.50 (dd,  $J = 10.7$  Hz, 4.2 Hz, 1H), 7.44 (d,  $J = 7.2$  Hz, 1H), 7.42 – 7.34 (m, 2H), 5.03 (s, 1H).

### Methyl-*N*-((4-methylbenzyl)oxy)benzamide (**3b**)

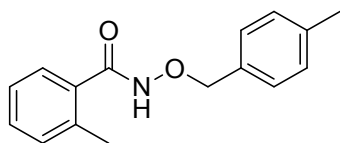

Following the modified procedure, **3b** was isolated as a white solid. Yield: 95%; m.p. 84-86 °C. <sup>1</sup>H (600 MHz, CDCl<sub>3</sub>) δ 7.38 – 7.29 (m, 3H), 7.24 (d, *J* = 7.3 Hz, 1H), 7.20 (t, *J* = 7.8, 3H), 7.15 (t, *J* = 7.4, 1H), 5.02 (s, 2H), 2.41 (s, 3H), 2.36 (s, 3H). HRMS (ESI) *m/z* calcd for C<sub>16</sub>H<sub>17</sub>NNaO<sub>2</sub><sup>+</sup> [*M* + Na<sup>+</sup>] 278.1151, found 278.1137.

### *N*-((4-Methoxybenzyl)oxy)cinnamamide (**3c**)

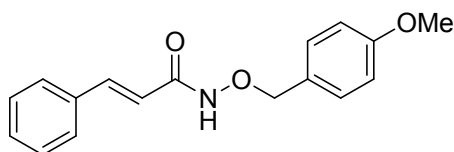

Following the modified procedure, **3c** was isolated as a white solid. Yield: 88%; m.p. 117-118 °C. <sup>1</sup>H (600 MHz, CDCl<sub>3</sub>) δ 7.68 (d, *J* = 15.7 Hz, 1H), 7.46 (s, 2H), 7.33 (d, *J* = 8.2 Hz, 5H), 6.87 (d, *J* = 8.3 Hz, 2H), 6.34 (br s, 1H), 4.90 (s, 2H), 3.76 (s, 3H). HRMS (ESI) *m/z* calcd for C<sub>17</sub>H<sub>17</sub>NNaO<sub>3</sub><sup>+</sup> [*M* + Na<sup>+</sup>] 306.1101, found 306.1088

### 2-Methylbenzamide (**4b**)<sup>5</sup>

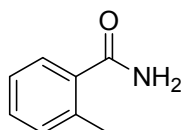

Following the general procedure, **4b** was isolated as a white solid. Yield: 78%; mp. 143-144 °C. <sup>1</sup>H (600 MHz, CDCl<sub>3</sub>) δ 7.46 (1 H, dd, *J* = 7.6, 1.0), 7.34 (1 H, td, *J* = 7.6, 1.3), 7.24 (1 H, d, *J* = 7.7), 7.22 (1 H, t, *J* = 7.5), 5.97 (1H, s), 5.91 – 5.58 (1 H, m), 2.50 (1 H, s).

### 2-Benzyl-*N*-methoxybenzamide (**6a**)<sup>2</sup>

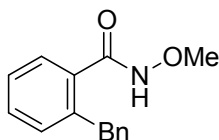



Following the general procedure, **6a** was isolated as a white solid. Yield: 70%; mp. 100-102 °C.  $^1\text{H}$  (600 MHz,  $\text{CDCl}_3$ )  $\delta$  8.02 (d,  $J = 7.8$  Hz, 1H), 7.41 – 7.37 (m, 1H), 7.35 (d,  $J = 7.2$  Hz, 1H), 7.29 – 7.22 (m, 5H), 7.20 – 7.12 (m, 3H), 4.19 (s, 2H), 3.70 (s, 3H).

### 2-Butyl-N-methoxy-1-naphthamide (**6b**)<sup>2</sup>

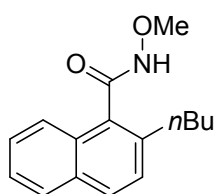

Following the general procedure, **6b** was isolated as a colorless oil. Yield: 65%.  $^1\text{H}$  (600 MHz,  $\text{CDCl}_3$ )  $\delta$  8.42 (s, 1H), 7.79 – 7.68 (m, 4H), 7.42 (dd,  $J = 11.2$  Hz, 4.0 Hz, 2H), 7.37 (t,  $J = 7.4$  Hz, 2H), 7.25 (d,  $J = 8.5$  Hz, 1H), 3.90 (s, 4H), 2.73 – 2.64 (m, 3H), 1.61 (dd,  $J = 15.0$  Hz, 7.5 Hz, 3H), 1.36 – 1.27 (m, 3H), 0.80 (t,  $J = 7.0$  Hz, 4H).

### 2-Benzylbenzamide (**7a**)

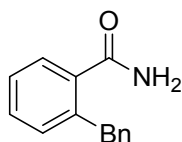

Following the general procedure, **7a** was isolated as a white solid. Yield: 80%; mp. 165-167 °C.  $^1\text{H}$  (600 MHz,  $\text{CDCl}_3$ )  $\delta$  7.48 (dd,  $J = 7.6$  Hz, 0.9 Hz, 1H), 7.41 – 7.34 (m, 1H), 7.31 – 7.25 (m, 4H), 7.24 (t,  $J = 7.1$  Hz, 1H), 7.18 (t,  $J = 8.0$  Hz, 3H), 5.84 (s, 1H), 5.70 (s, 1H), 4.24 (s, 2H). HRMS (ESI)  $m/z$  calcd for  $\text{C}_{14}\text{H}_{13}\text{NNaO}^+$  [ $\text{M} + \text{Na}^+$ ] 234.0889, found 306.1073.

### 2-Butyl-1-naphthamide (**7b**)

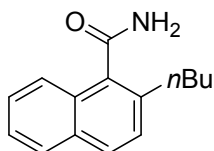

Following the general procedure, **7b** was isolated as a white solid. Yield: 89%; mp. 68-70 °C.  $^1\text{H}$  (600 MHz,  $\text{CDCl}_3$ )  $\delta$  7.93 (d,  $J = 8.3$  Hz, 1H), 7.81 (d,  $J = 3.3$  Hz, 1H), 7.80 (d,  $J = 3.8$  Hz, 1H), 7.58 – 7.48 (m, 1H), 7.48 – 7.41 (m, 1H), 7.36 (d,  $J = 8.5$  Hz, 1H), 6.31 (s, 1H), 5.91 (s, 1H), 2.99 – 2.58 (m, 2H), 1.70 (dt,  $J = 15.6$  Hz, 7.7 Hz, 2H), 1.48 – 1.35 (m, 2H), 0.89 (dd,  $J = 9.3$  Hz, 4.8 Hz, 3H). HRMS (ESI)  $m/z$  calcd for

$C_{15}H_{17}NNaO^+$  [ $M + Na^+$ ] 250.1202, found 250.1193.

### 2-Iodo-N-methoxy-N-methylbenzamide (6)

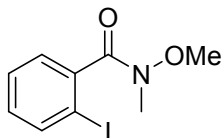

Following the literature procedure,<sup>1</sup> **6** was isolated as a white solid. Yield: 50%; mp. 55-58 °C.  $^1H$  (600 MHz,  $CDCl_3$ )  $\delta$  7.83 (dd,  $J = 8.0$  Hz, 0.9 Hz, 1H), 7.39 (t,  $J = 7.4$  Hz, 1H), 7.27 (dd,  $J = 7.6$  Hz, 1.4 Hz, 1H), 7.10 (td,  $J = 7.8$  Hz, 1.4 Hz, 1H), 3.93 (s, 1H), 3.46 (s, 2H), 3.40 (s, 2H), 3.11 (s, 1H).  $^{13}C$  (150 MHz,  $CDCl_3$ )  $\delta$  170.8, 141.7, 138.9, 130.3, 127.7, 127.2, 92.5, 61.4, 32.6

### 2-Methoxyisoindoline-1,3-dione (7)

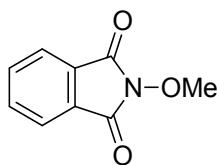

Following the literature procedure,<sup>3</sup> **7** was isolated as a white solid. Yield: 89%; mp. 135-138 °C.  $^1H$  (600 MHz,  $CDCl_3$ )  $\delta$  7.85 (ddd,  $J = 5.3$  Hz, 3.1 Hz, 1.0 Hz, 2H), 7.78 – 7.75 (m, 2H), 4.08 (d,  $J = 0.9$  Hz, 3H).  $^{13}C$  (150 MHz,  $CDCl_3$ )  $\delta$  163.3, 134.6, 128.9, 123.6, 65.9.

### N-(tert-Butoxy)-3,4-dimethoxybenzamide (8)

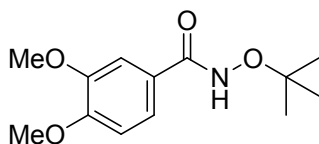

Following the literature procedure,<sup>1</sup> **8** was isolated as a white solid. Yield: 71%; mp. 114-115 °C.  $^1H$  (600 MHz,  $CDCl_3$ )  $\delta$  7.39 (d,  $J = 1.5$  Hz, 1H), 7.30 (d,  $J = 7.9$  Hz, 1H), 6.85 (d,  $J = 8.3$  Hz, 1H), 3.93 (s, 3H), 3.92 (s, 3H), 1.34 (s, 8H).  $^{13}C$  (150 MHz,  $CDCl_3$ )  $\delta$  167.2, 152.1, 149.2, 124.8, 119.6, 110.7, 110.3, 82.3, 56.1, 56.0, 26.4. HRMS (ESI)  $m/z$  calcd for  $C_{13}H_{19}NNaO_4^+$  [ $M + Na^+$ ] 276.1206, found 276.1177.

#### 4-Chloro-*N*-hydroxybenzamide (**9**)

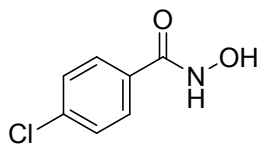

Following the literature procedure,<sup>4</sup> **9** was isolated as a white solid. Yield: 70 %; mp. 183-185 °C. <sup>1</sup>H (600 MHz, DMSO) δ 11.30 (s, 1H), 9.11 (s, 1H), 7.76 (d, *J* = 8.6 Hz, 2H), 7.53 (d, *J* = 8.5Hz, 2H). <sup>13</sup>C (150 MHz, DMSO) δ 163.1, 135.9, 131.5, 128.8, 128.5.

#### 1,4-Diazabicyclo[2.2.2]octane-1,4-dium-1,4-disulfinate

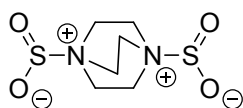

In the reaction of substrate **1a**, DABSO was isolated as a white solid. <sup>1</sup>H (600 MHz, CD<sub>3</sub>OD) δ 3.20 (s); <sup>13</sup>C (150 MHz, MeOD) δ 45.59. IR ν max (KBr)/cm<sup>-1</sup> 3441, 3010, 2802, 2284, 1646, 1474, 1411, 1174, 1098, 1055.

#### 4. References

1. S. Rakshit, C. Grohmann, T. Besset, F. Glorius. *J. Am. Chem. Soc.* 2011, **133**, 2350.
2. Z. H. Chen, L. A. Hu, F. Y. Zeng, R. R. Zhu, S. S. Zheng, Q. Z. Yu, J. H. Huang. *Chem. Commun.* 2017, **53**, 4258.
3. J. N. Kim, K. M. Kim, E. K. Ryu. *Synth. Commun.* 1992, **22**, 1427.
4. G. Dettori, S. Gaspa, A. Porcheddu, L. De Luca. *Adv. Synth. Catal.* 2014, **356**, 2709.
5. J. W. Wrigglesworth, B. Cox, G. C. L. Jones, K. I. B. Milburn. *Org. Lett.* 2011, **13**, 5326.
6. Z. W. Chen, Y. Z. Zhu, J. W. Ou, Y. P. Wang, J. Y. Zheng, *J. Org. Chem.* 2014, **79**, 10988.
7. K. Inamoto, J. Kawasaki, K. Hiroya, Y. Kondo, T. Doi, *Chem. Commun.* 2012, **48**, 4332.
8. R. Zeng, C. L. Fu, S. M. Ma, *J. Am. Chem. Soc.* 2012, **134**, 9597.
9. J. Willwacher, S. Rakshit, F. Glorius, *Org. Biomol. Chem.* 2011, **9**, 4736.
10. T. Kukosha, N. Trufilkina, M. Katkevics, *Synlett* 2011, 2525.
11. K. Inamoto, J. Kawasaki, K. Hiroya, Y. Kondo, T. Doi. *Chem. Commun.* 2012, **48**, 4332.
12. S. Rakshit, C. Grohmann, T. Besset, F. Glorius, *J. Am. Chem. Soc.* 2011, **133**, 2350.
13. K. Rajendar, R. Kant, T. Narendara, *Adv. Synth. Catal.* 2013, **355**, 3591.
14. Q. L. Song, Q. Feng, K. Yang, *Org. Lett.* 2014, **16**, 624.
15. Y. H. Long, Z. G. She, X. C. Liu, Y. C. *J. Org. Chem.* 2013, **78**, 2579.
16. M. W. Bundesmann, S. B. Coffey, S. W. Wright, *Tetrahedron Lett.* 2010, **51**, 3879.
17. W. Zhan, L. Ji, Z. M. Ge, X. Wang, R. T. Li. *Tetrahedron* 2018, **74** 1522.
18. M. Mori, K. Chiba, Y. Ban. *J. Org. Chem.* 1978, **43**, 1978.

## 5. $^1\text{H}$ -NMR and $^{13}\text{C}$ -NMR Spectra

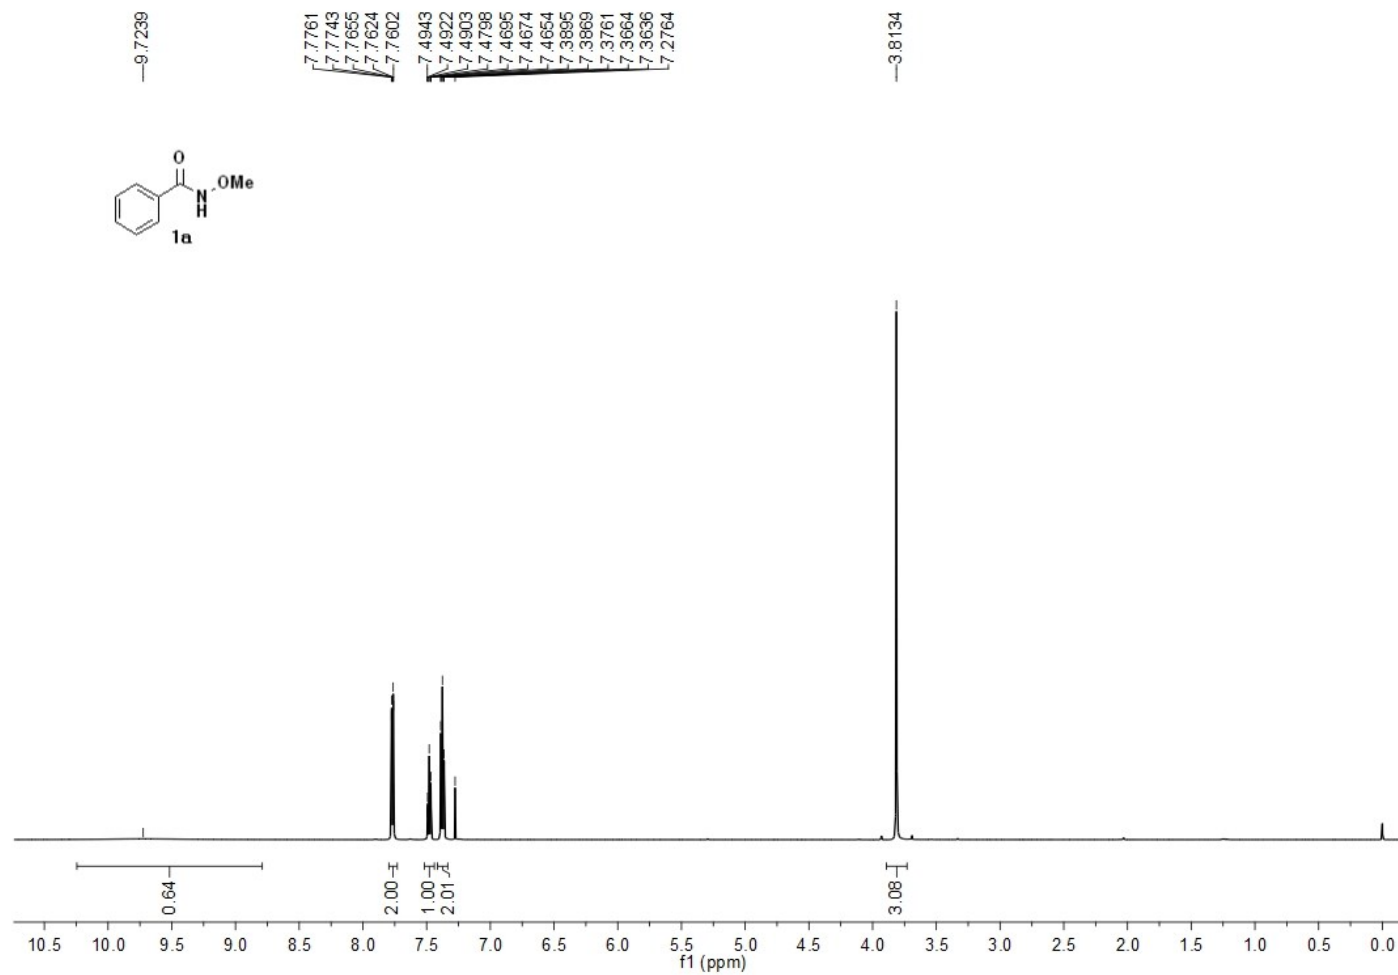

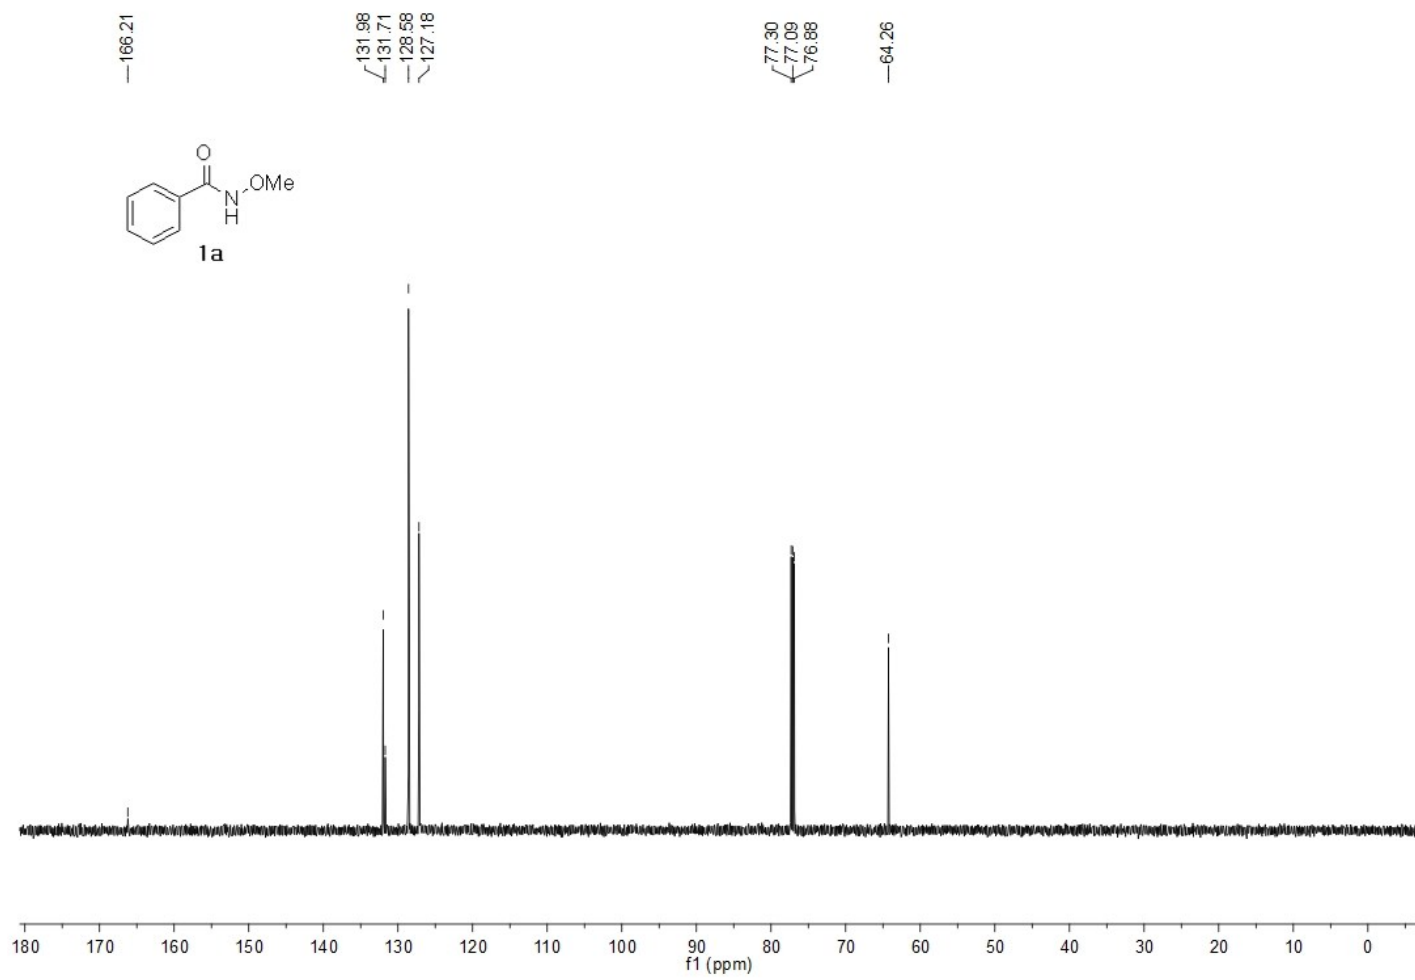

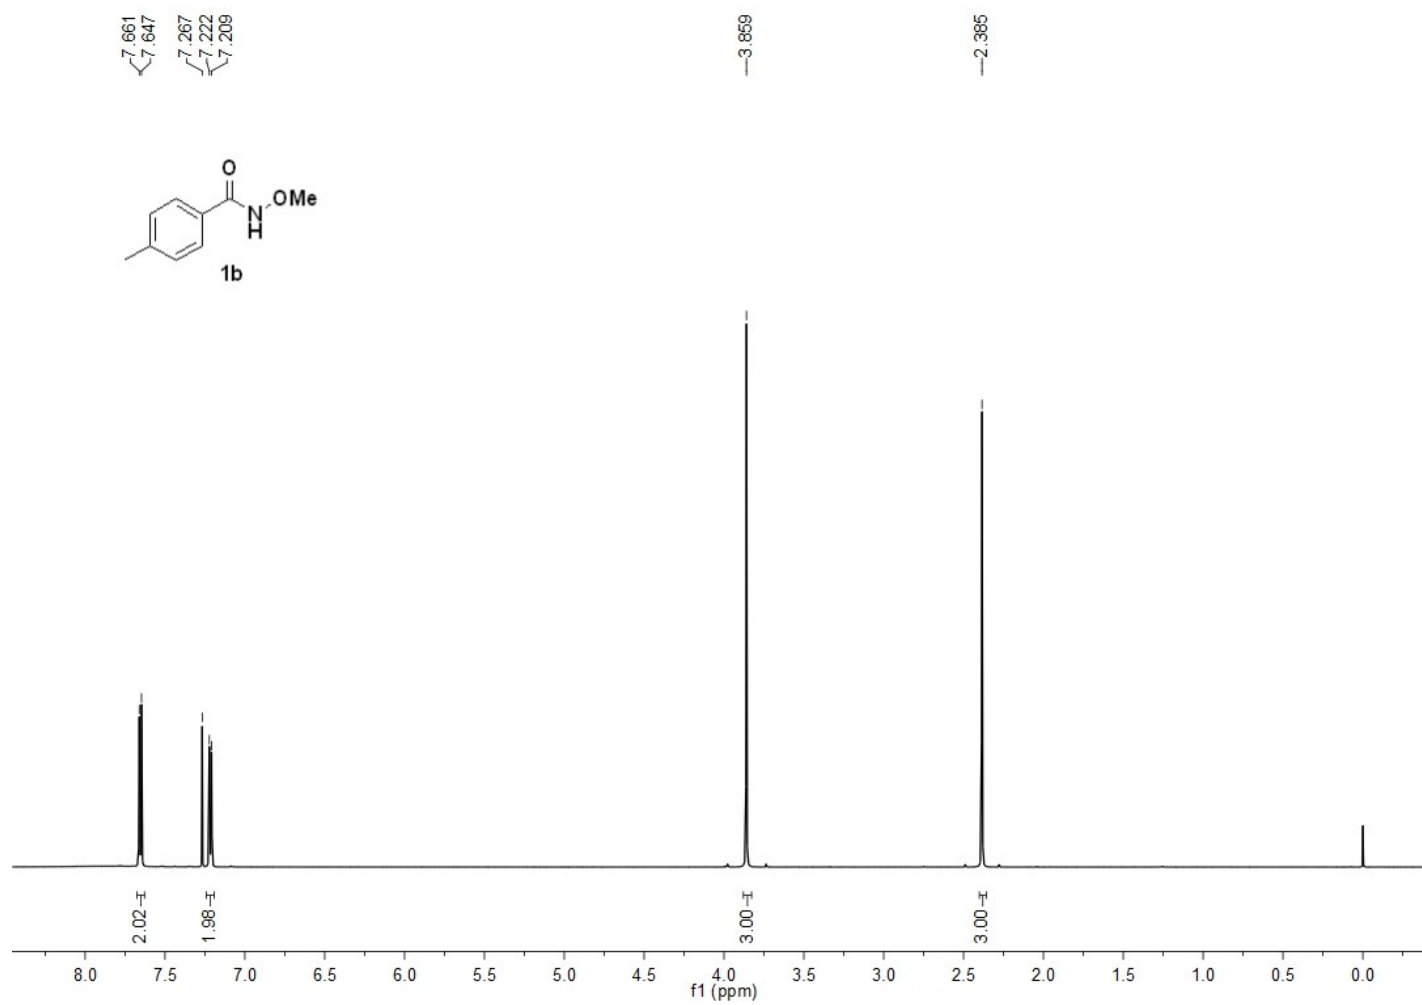

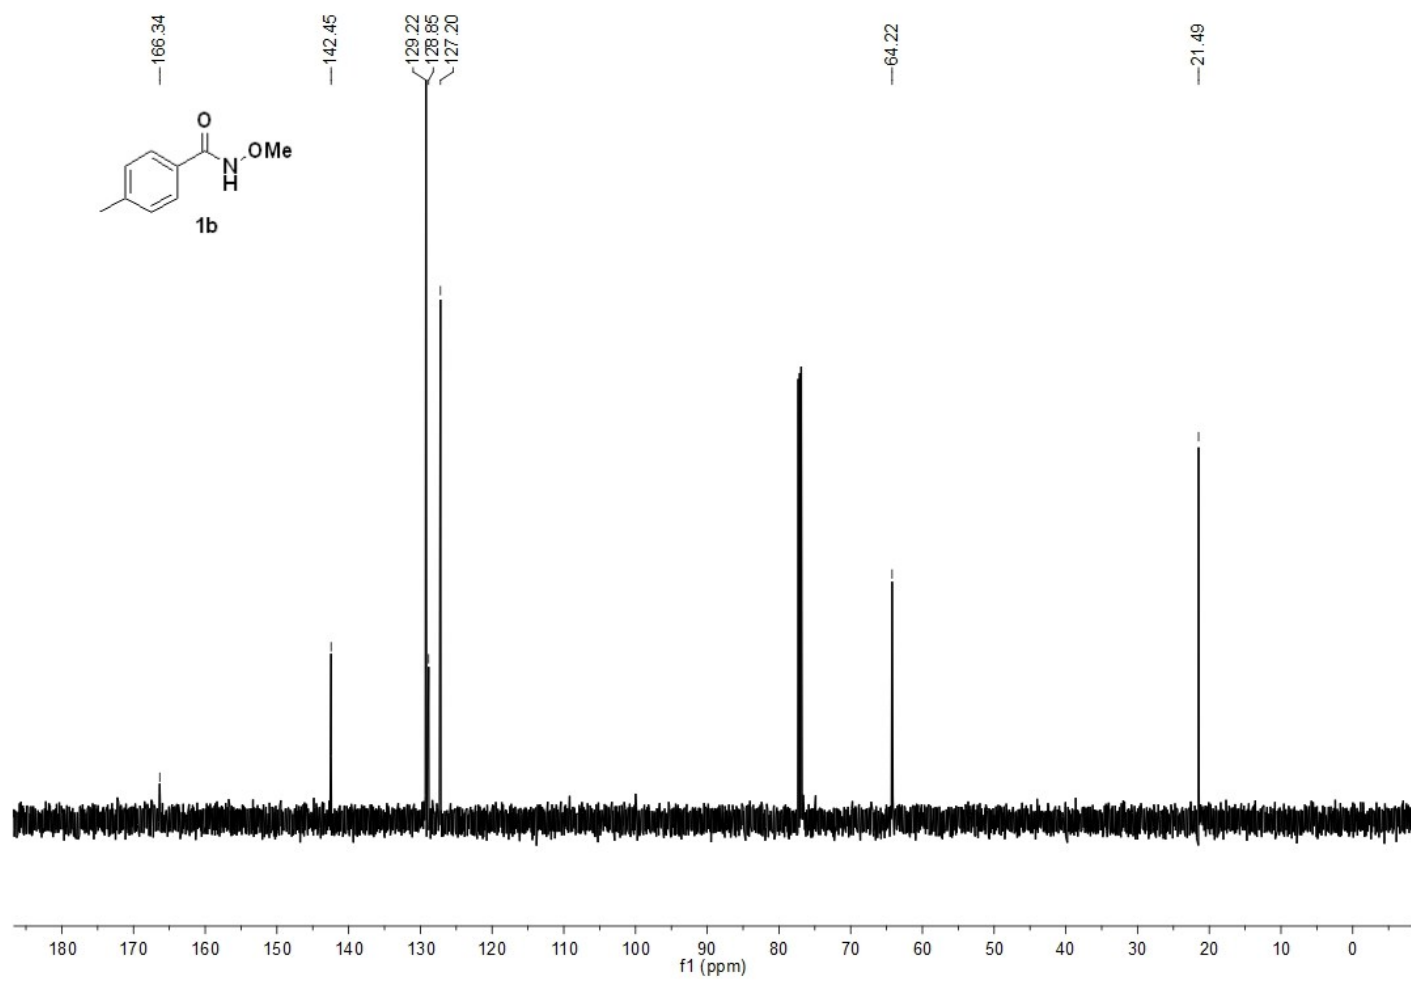



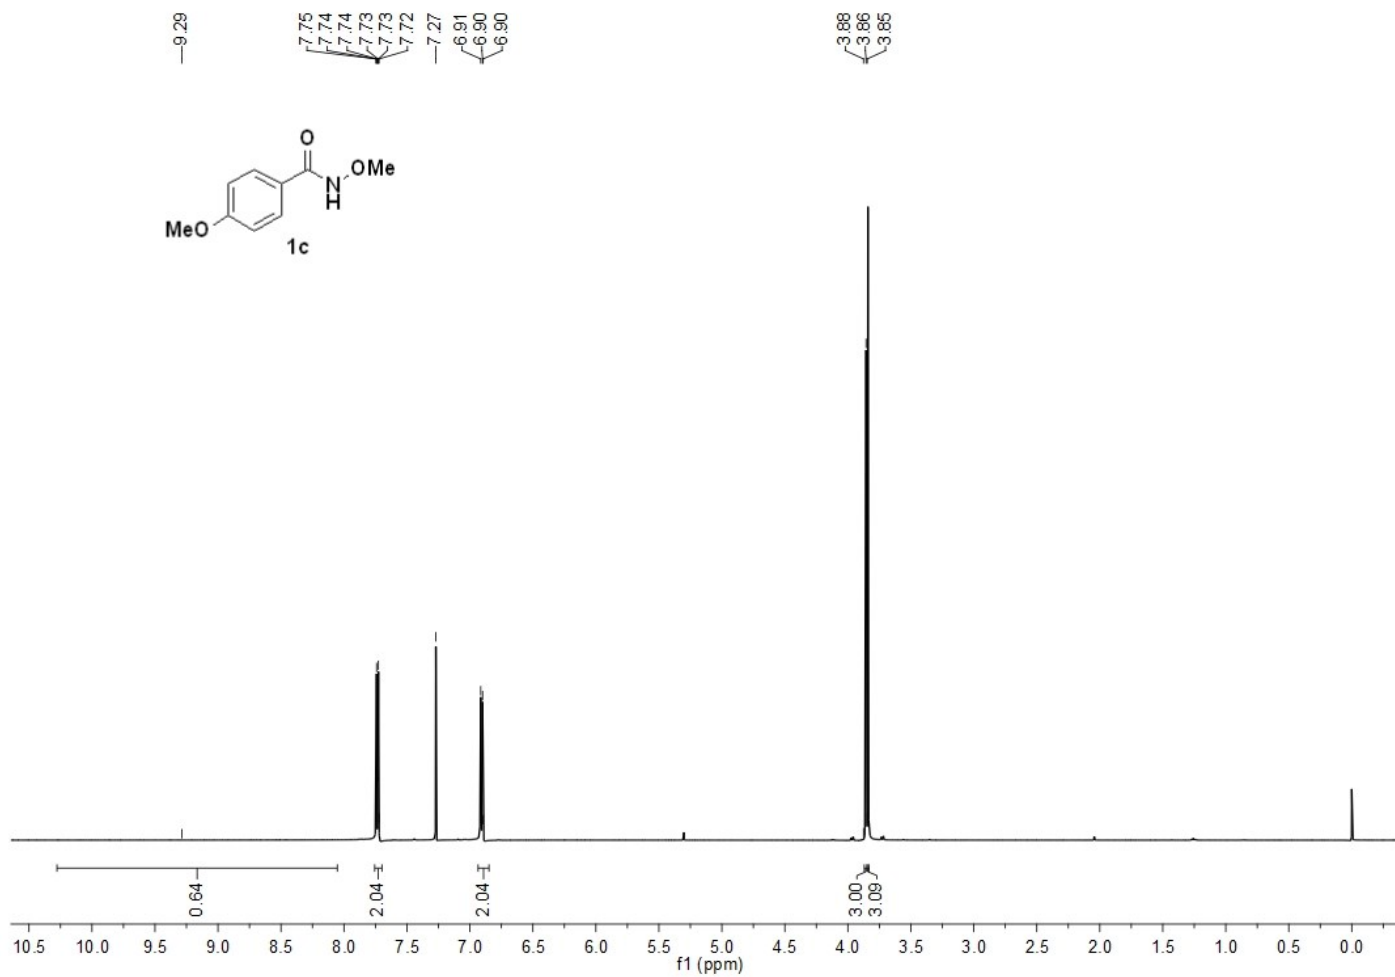

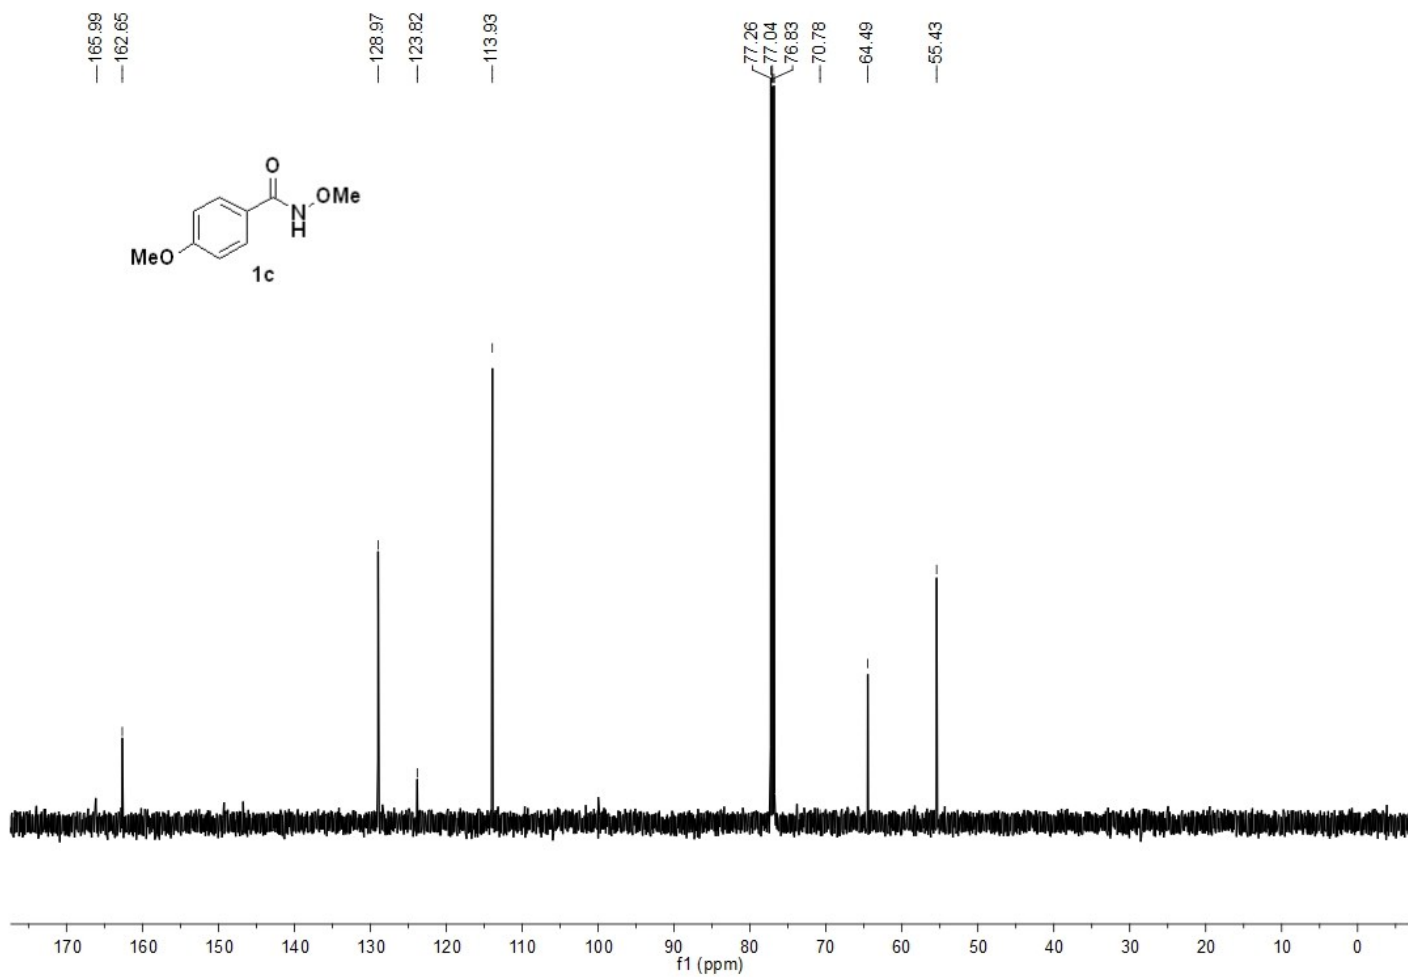

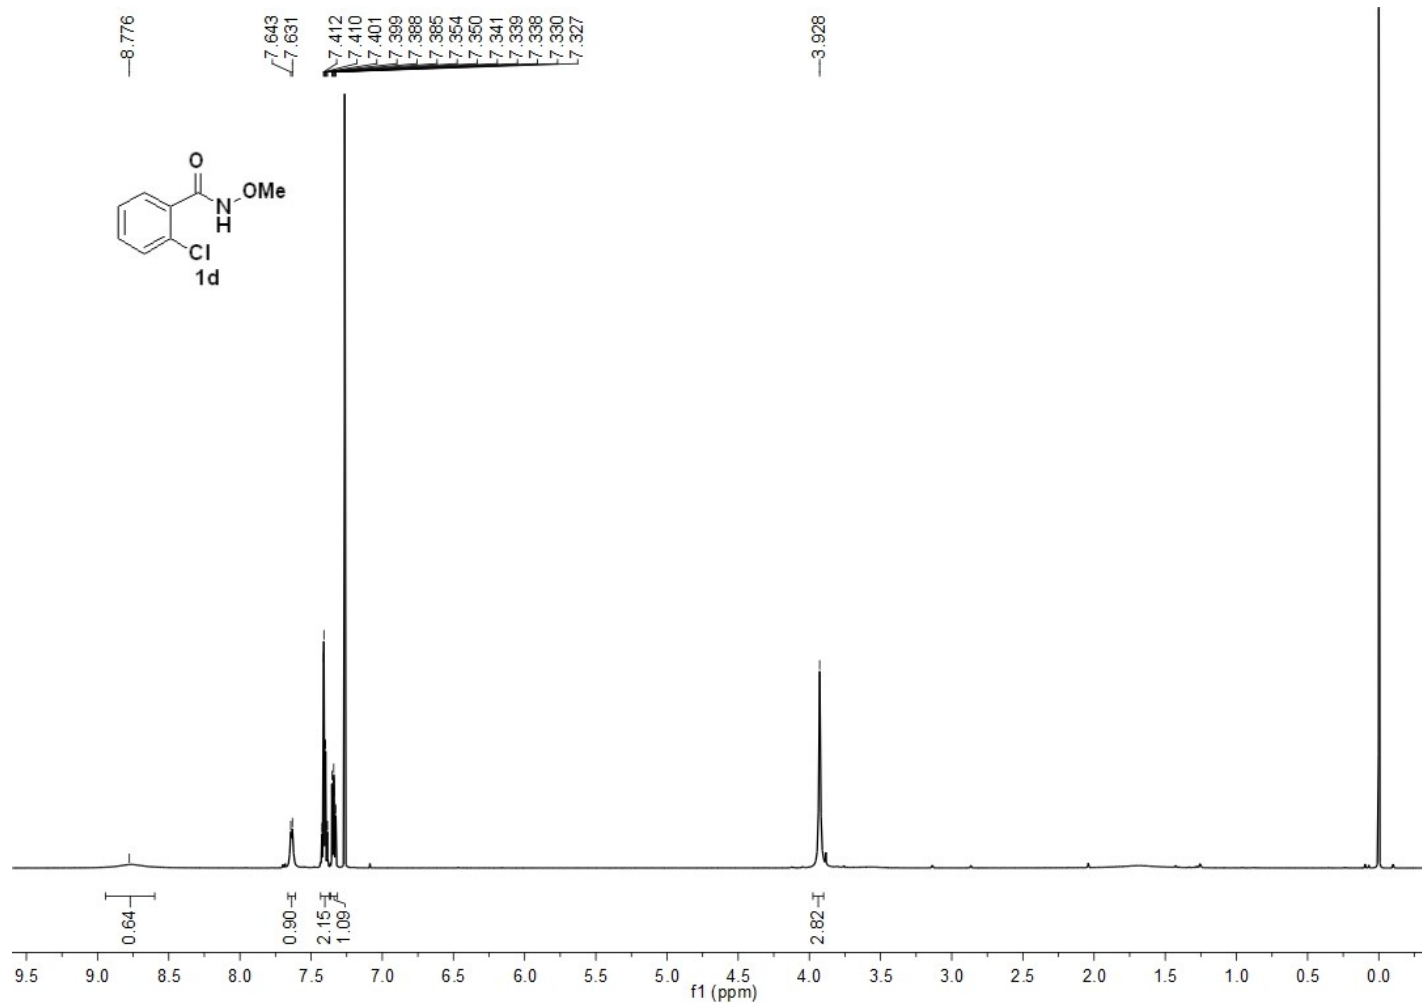

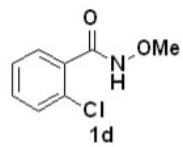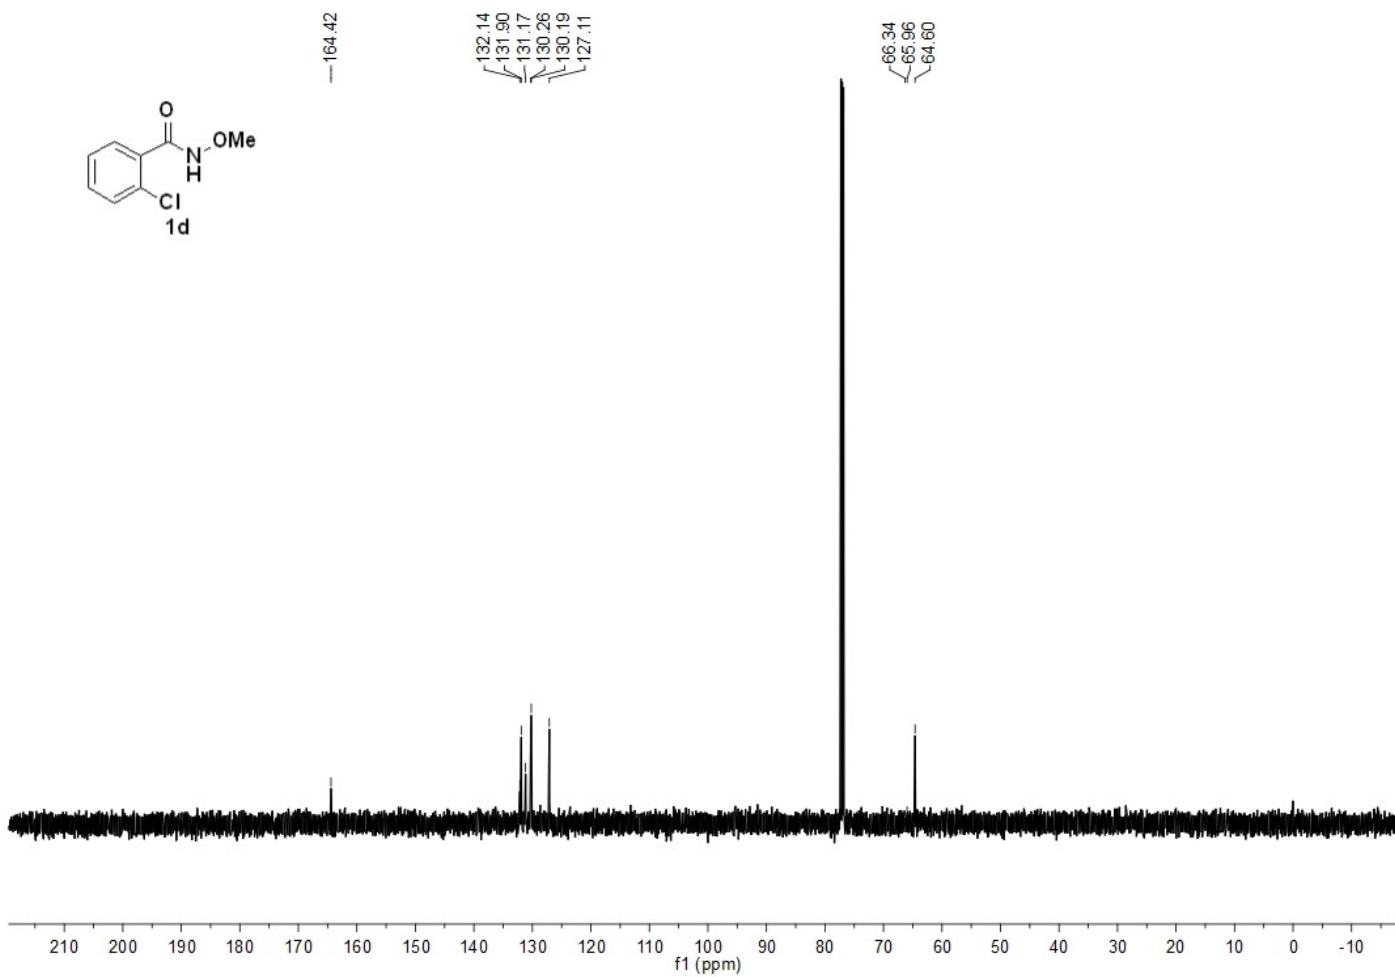

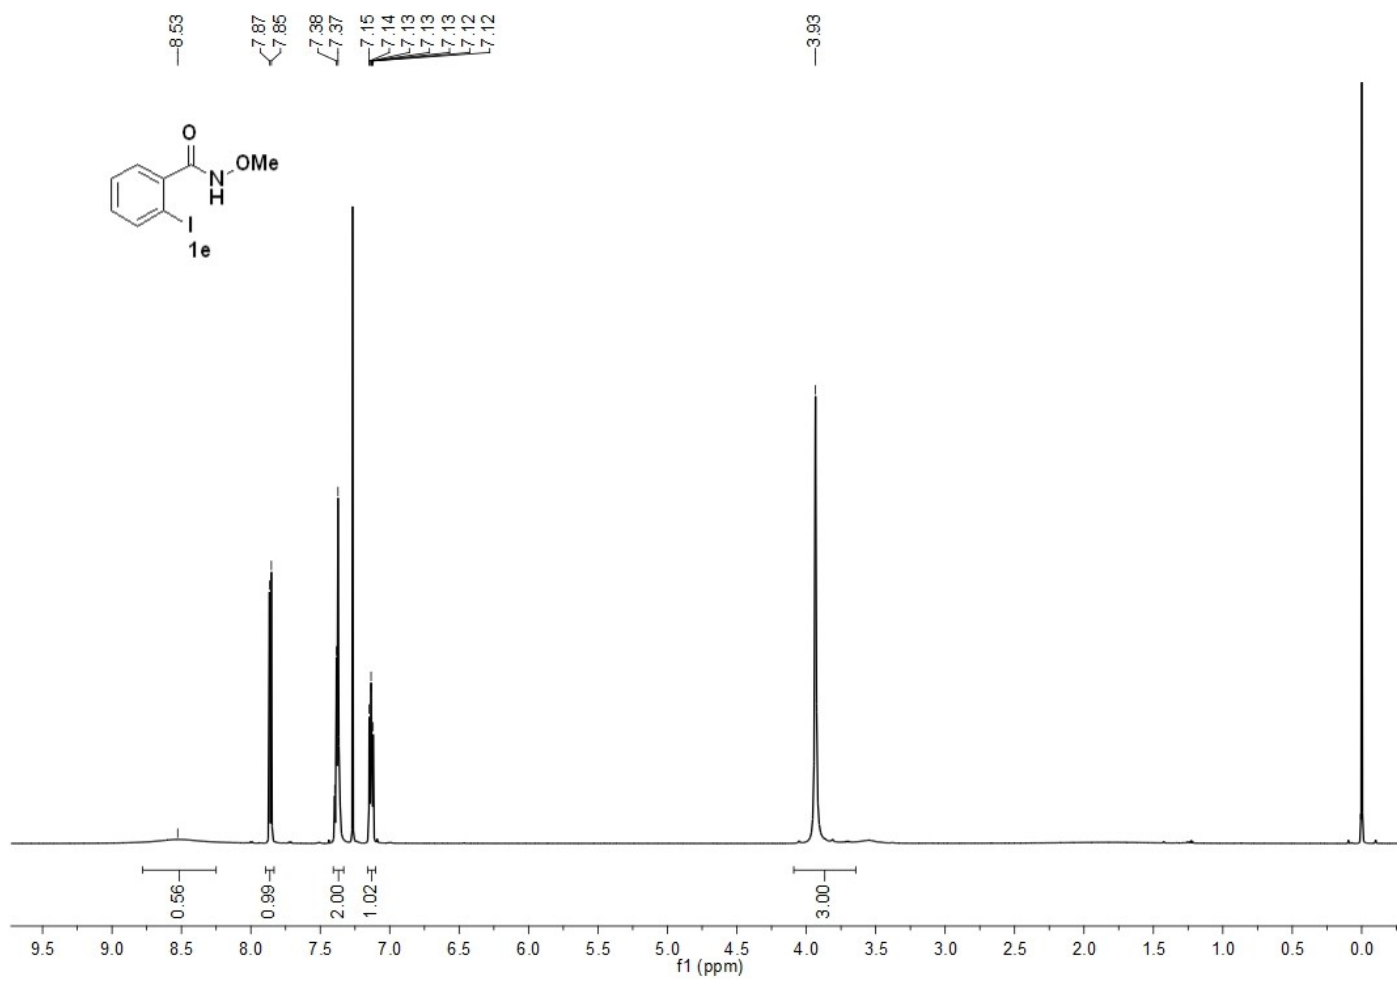

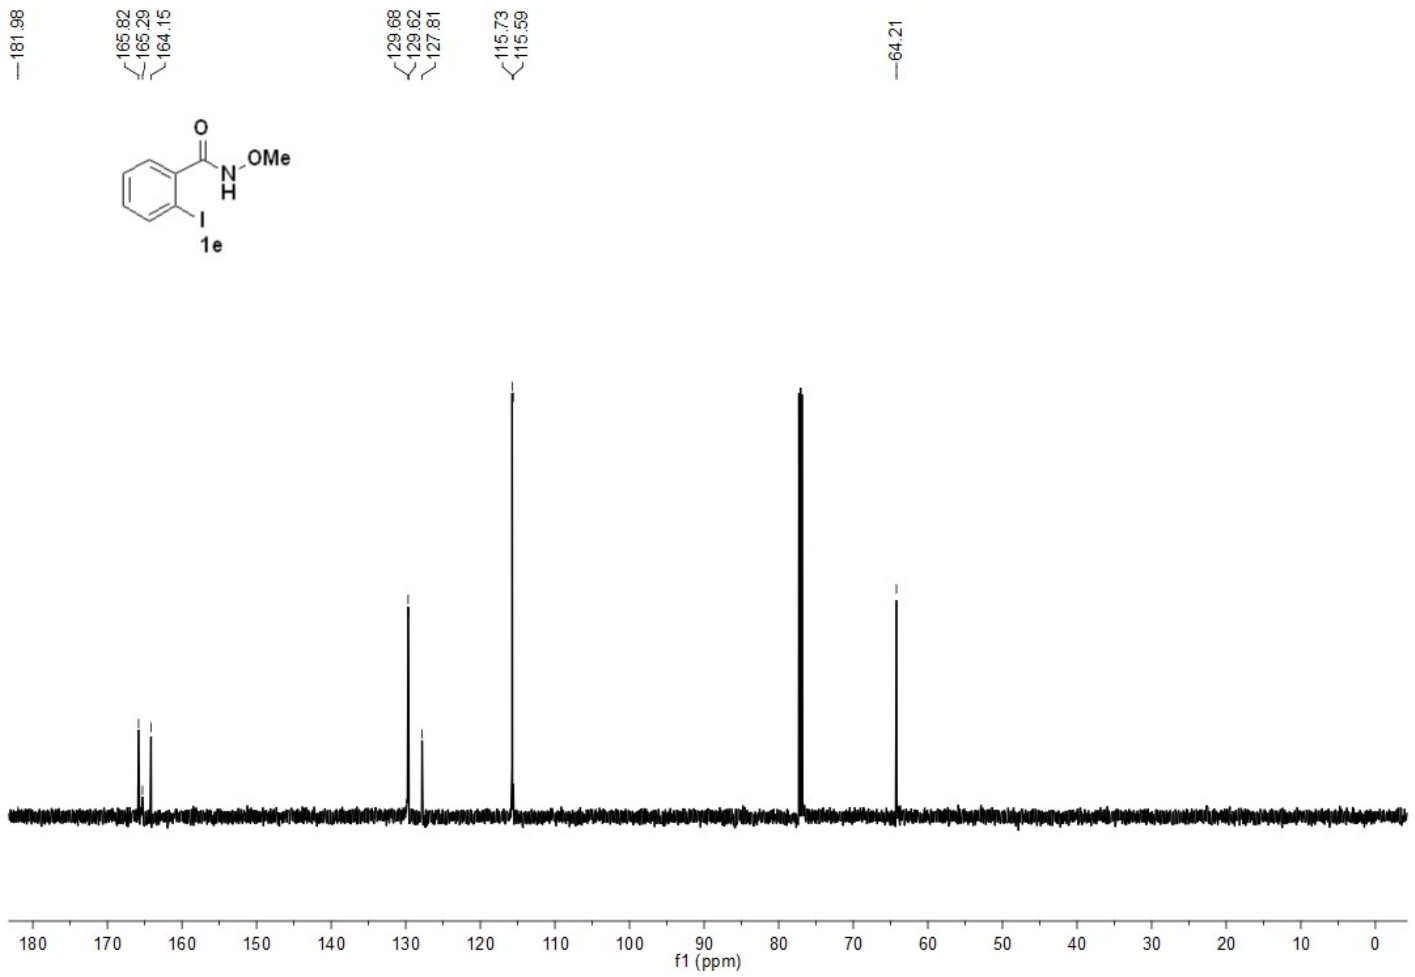

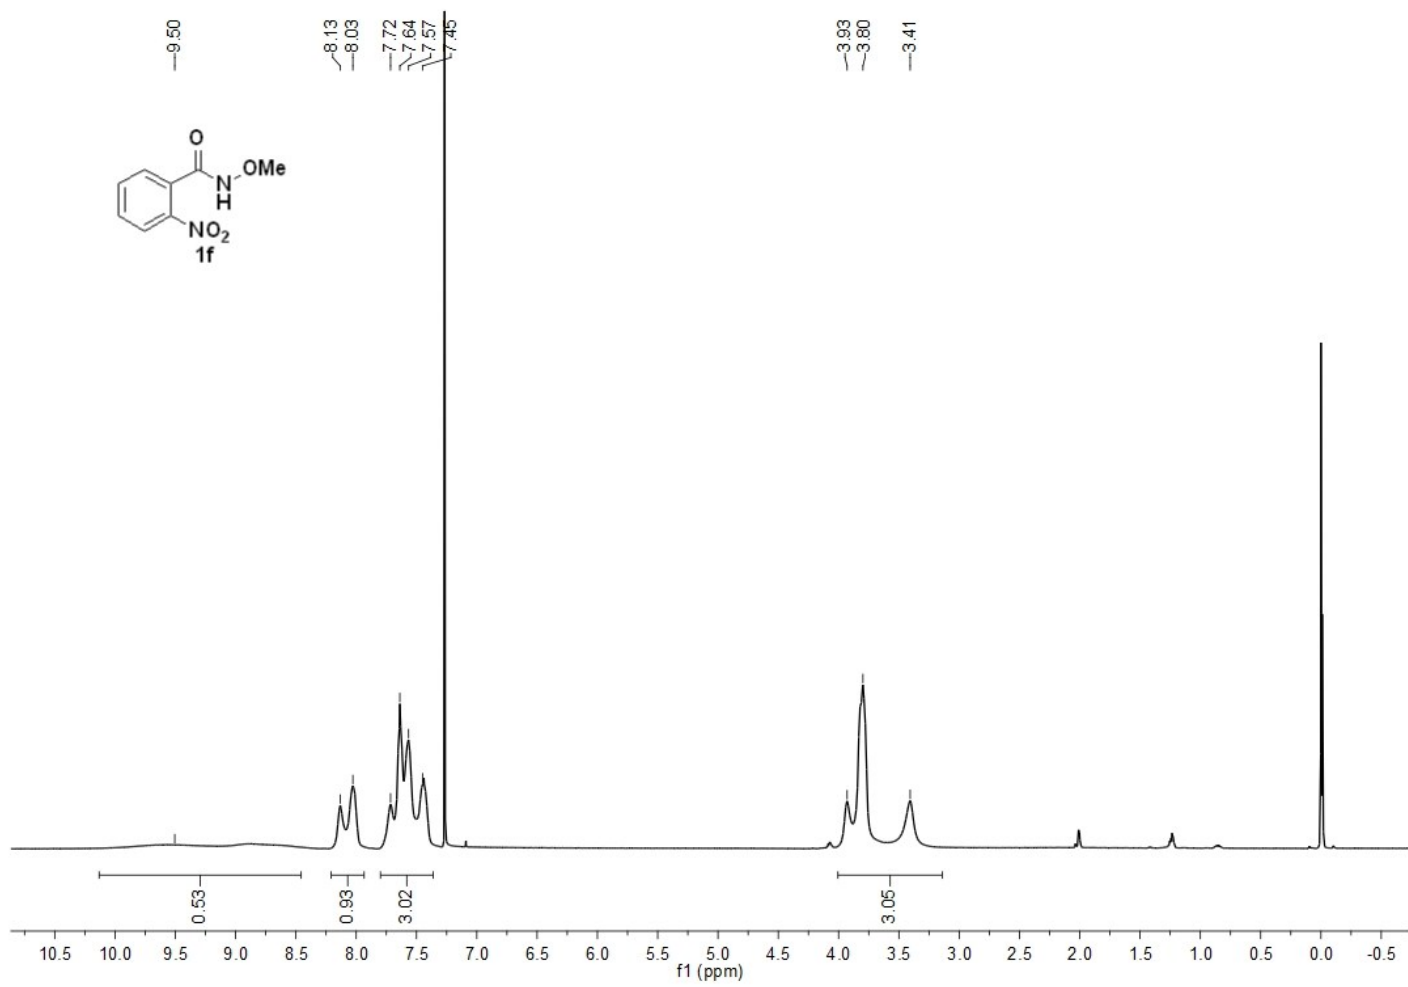

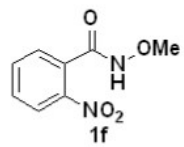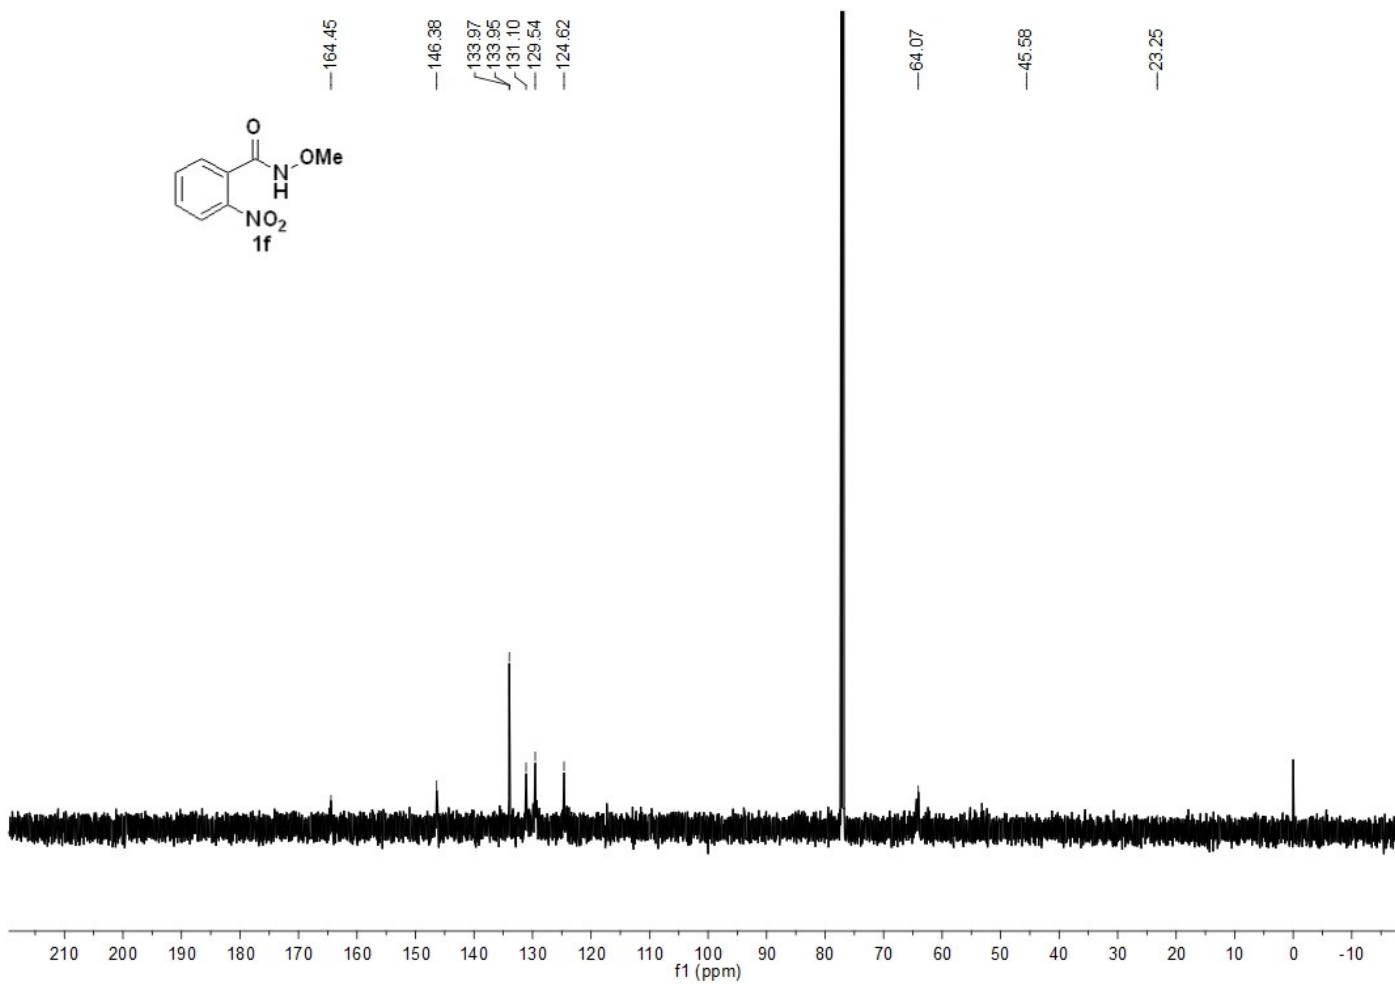



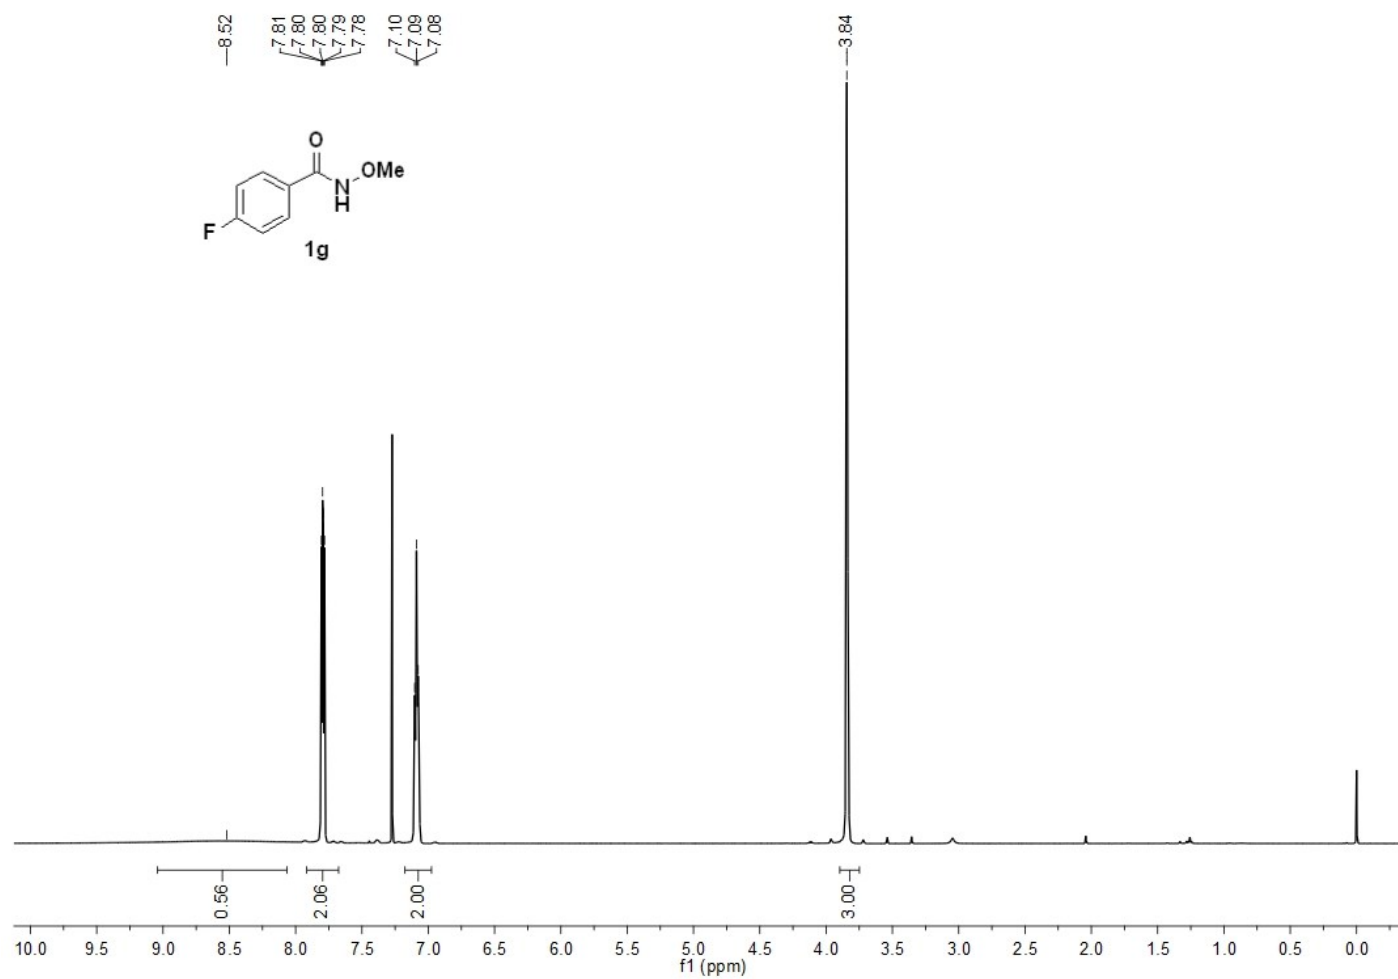

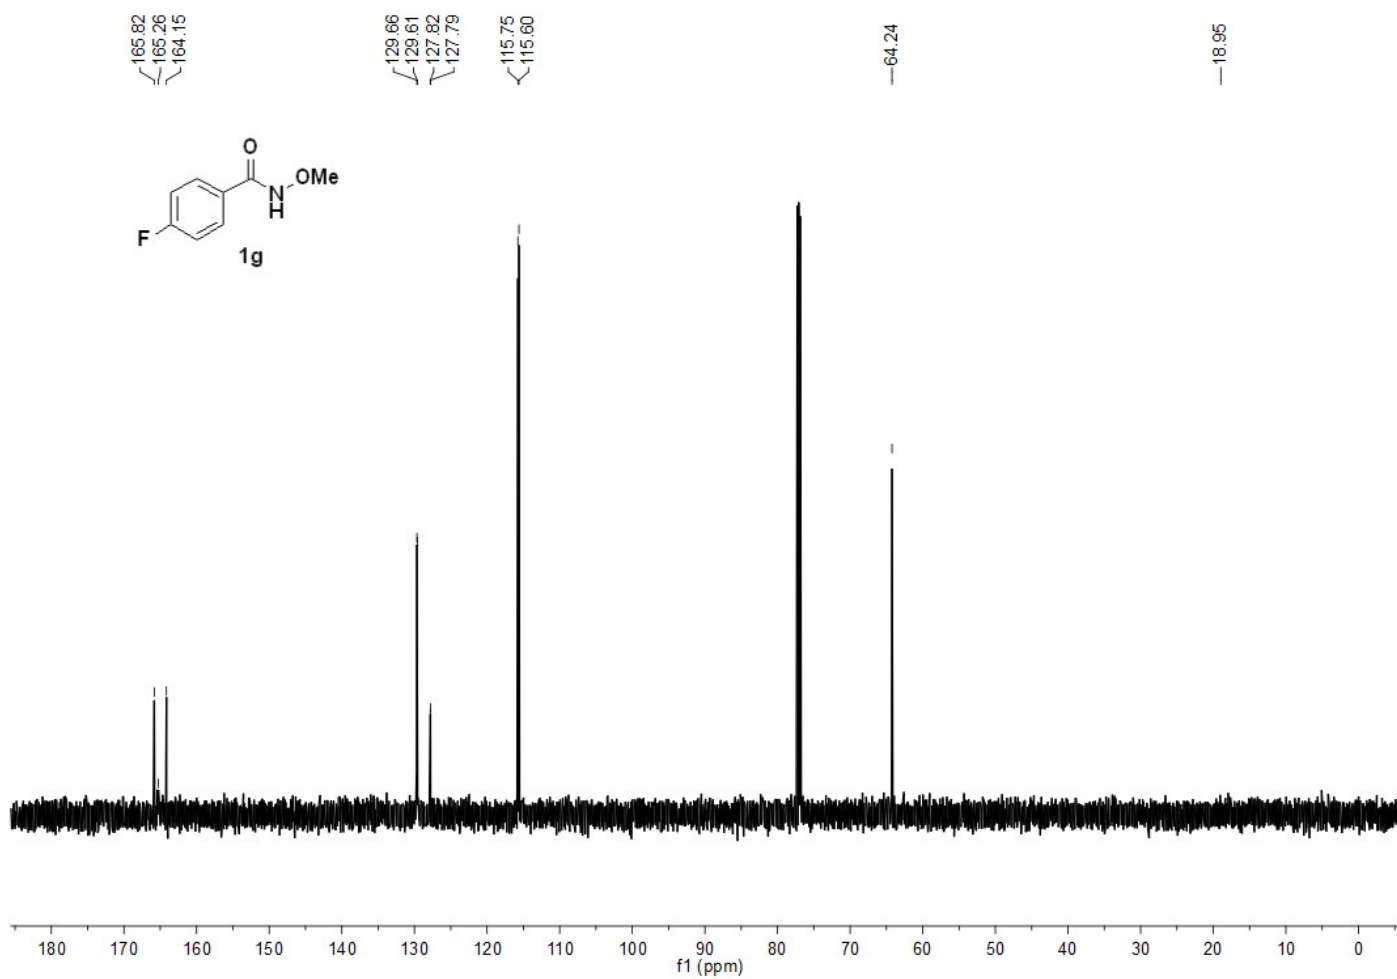

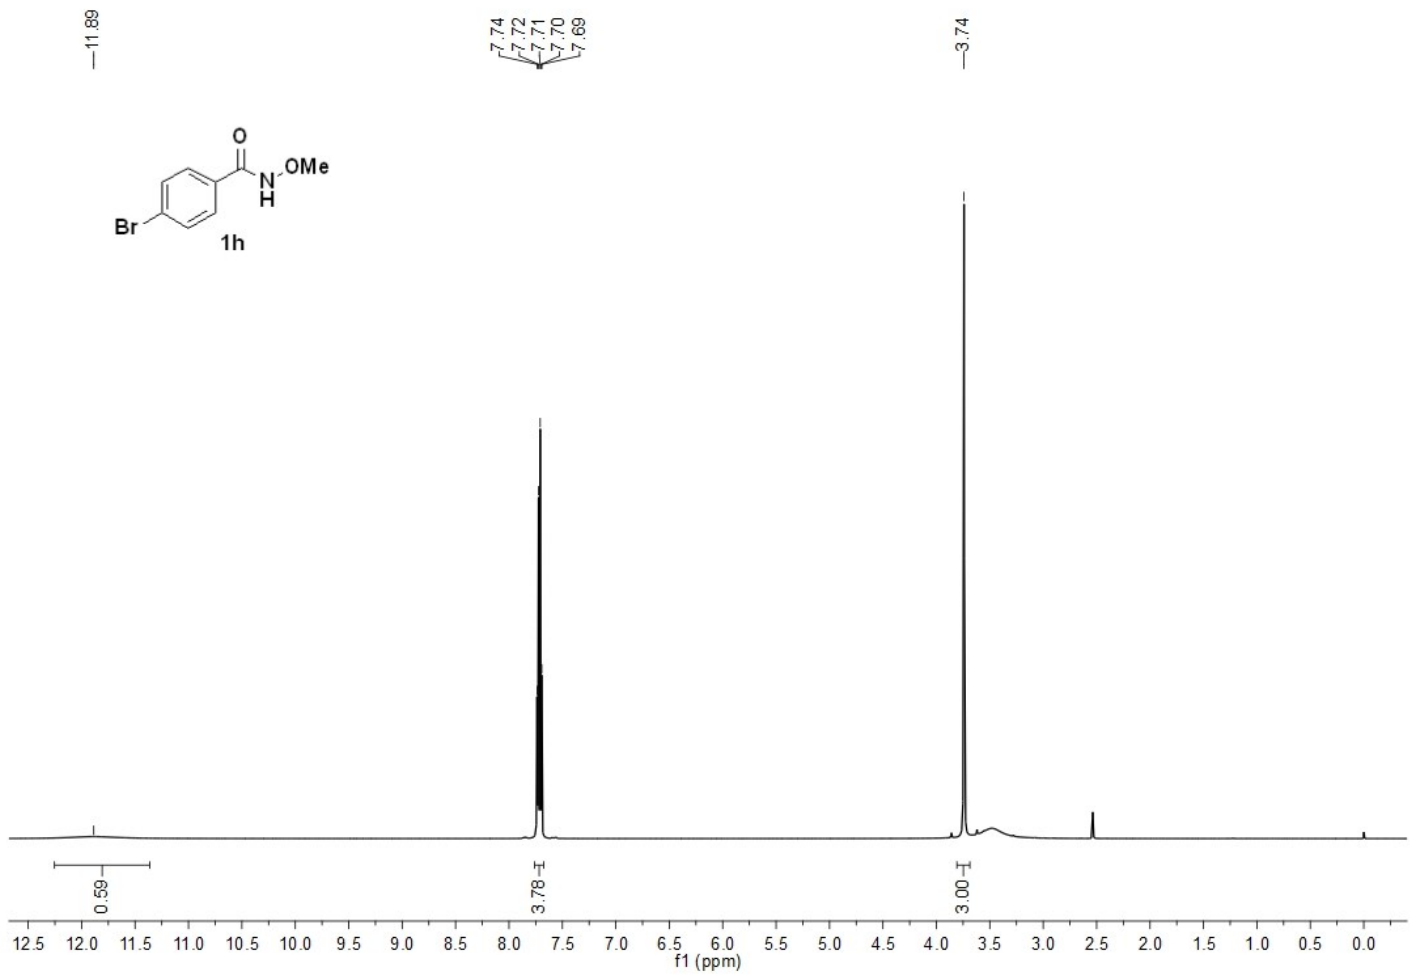

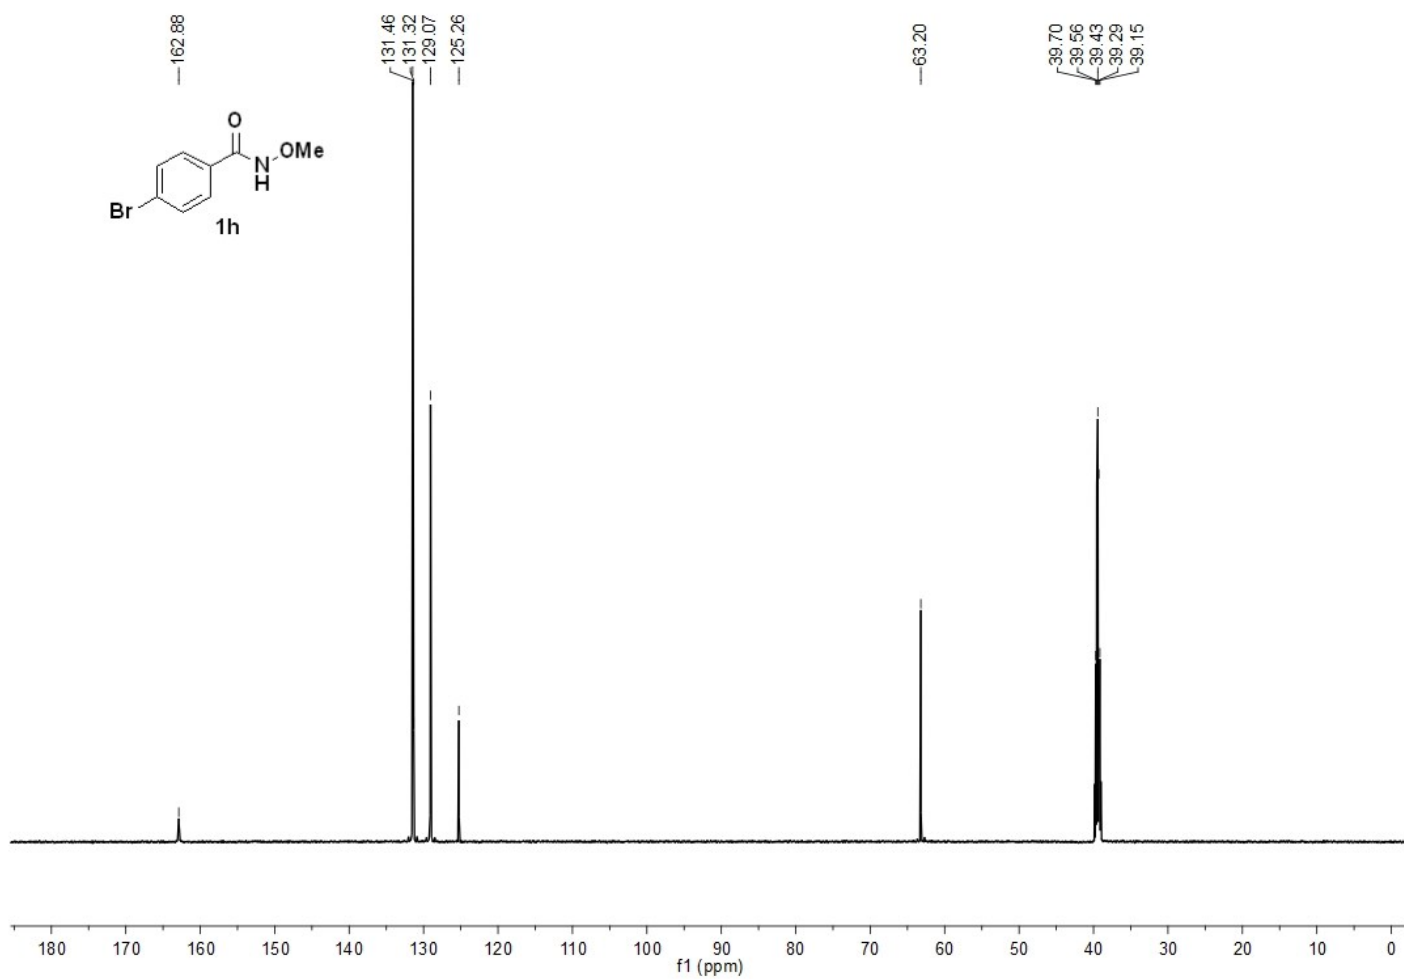

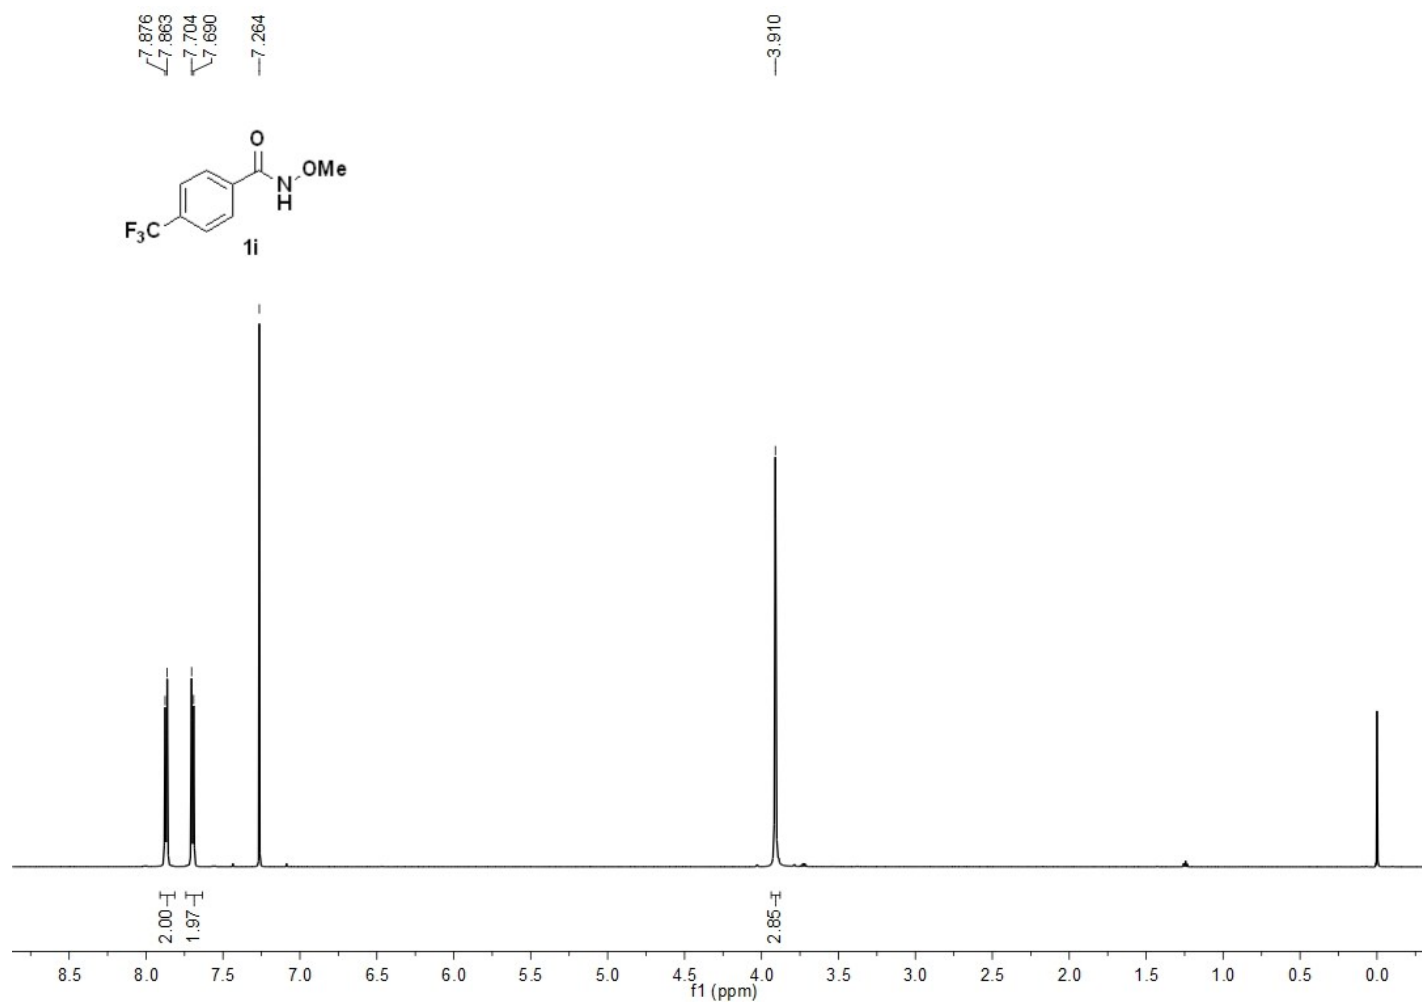

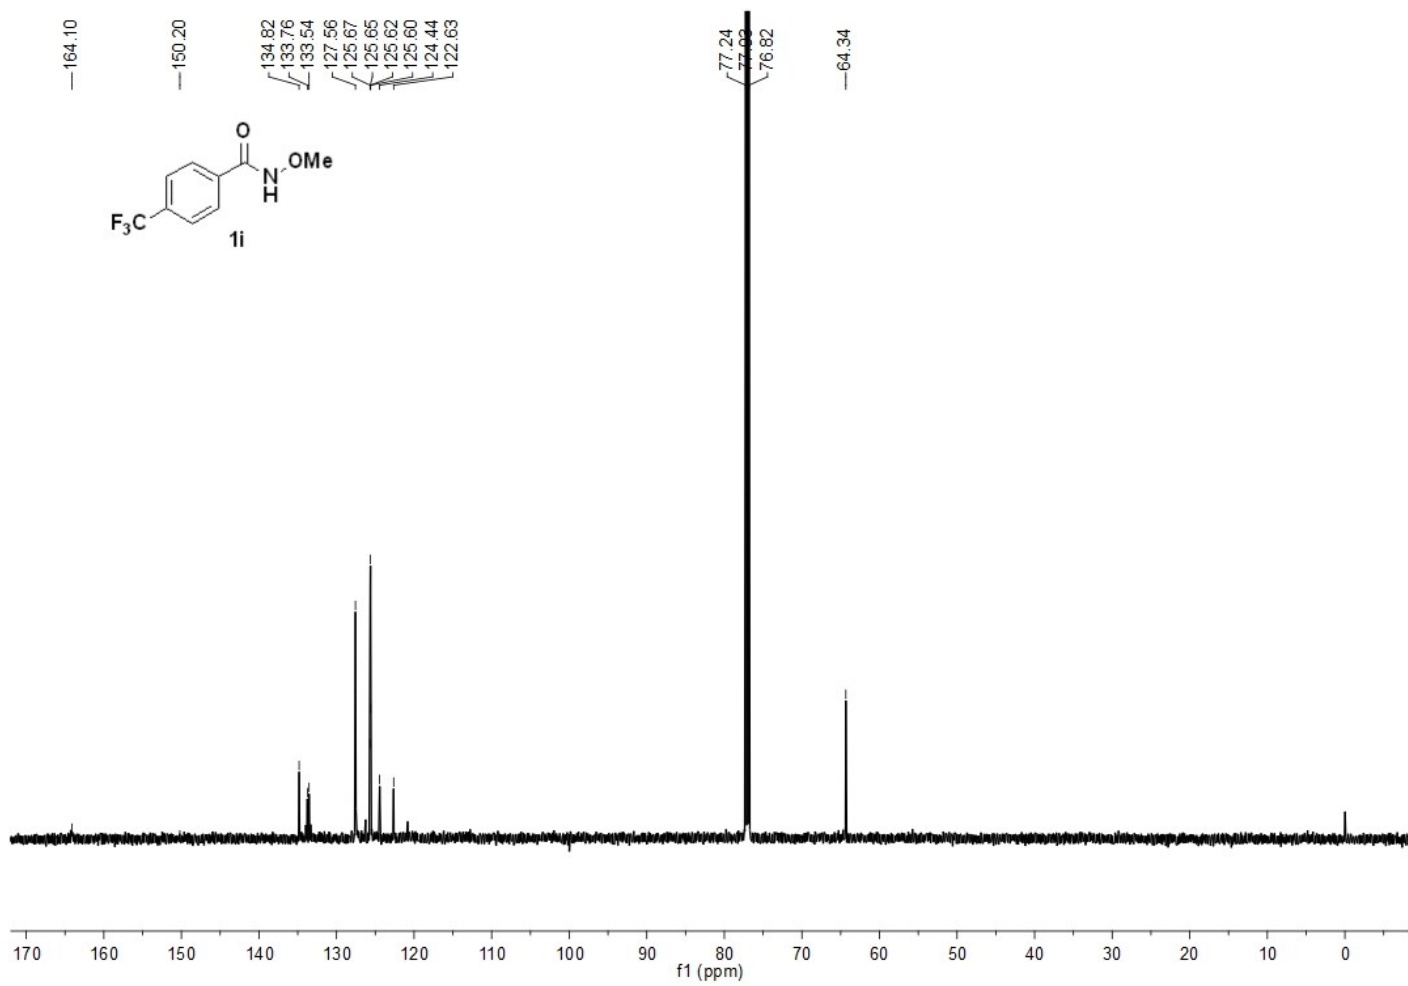

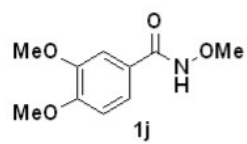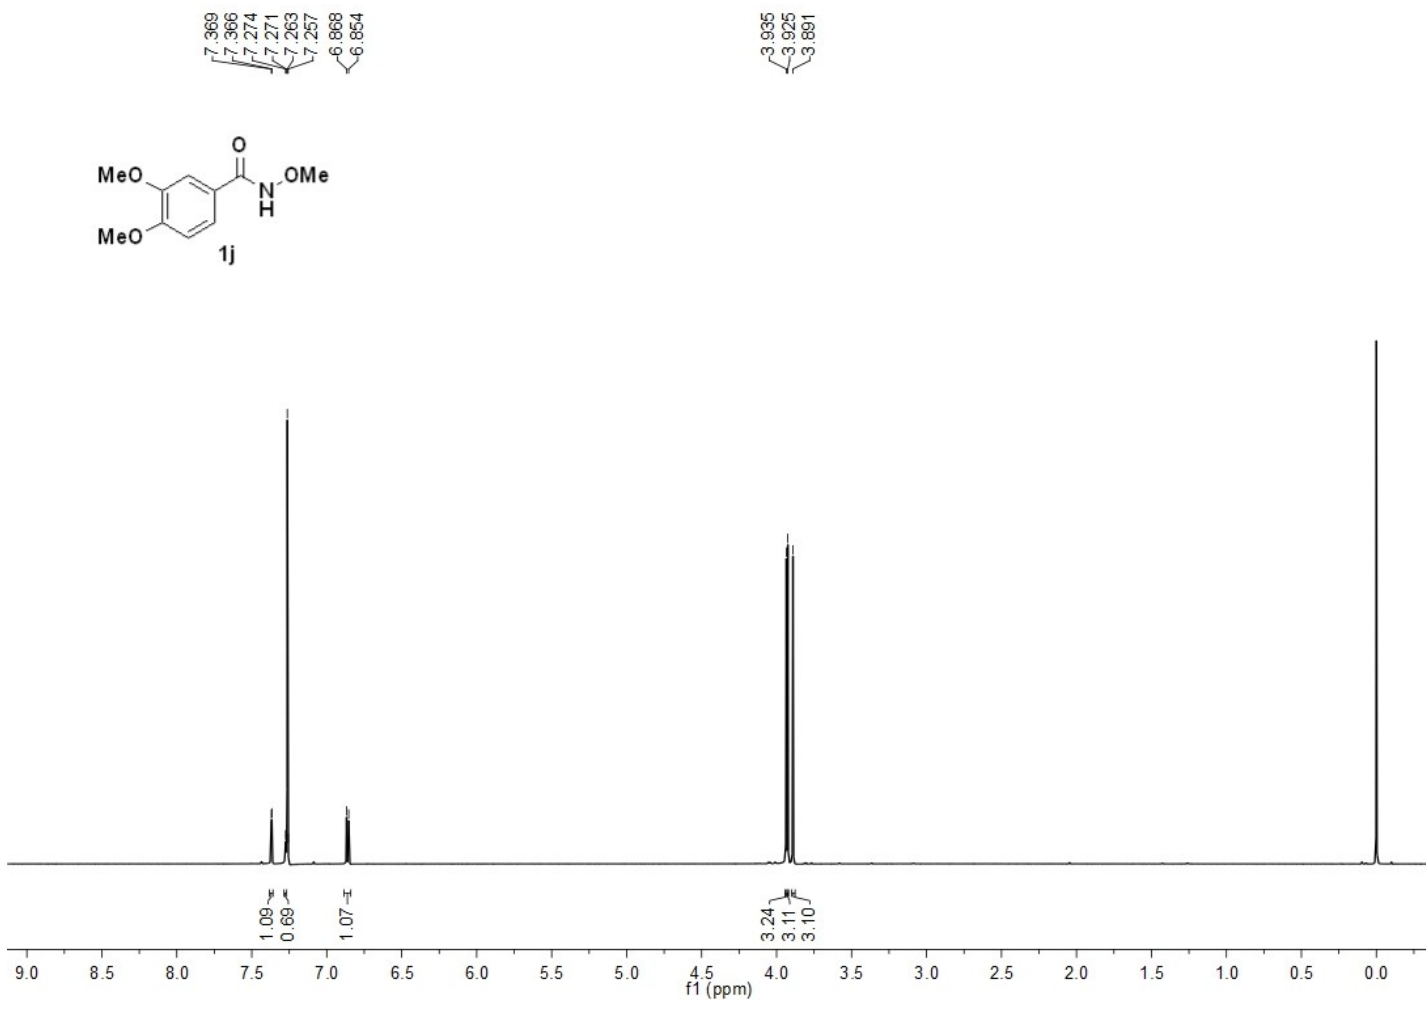

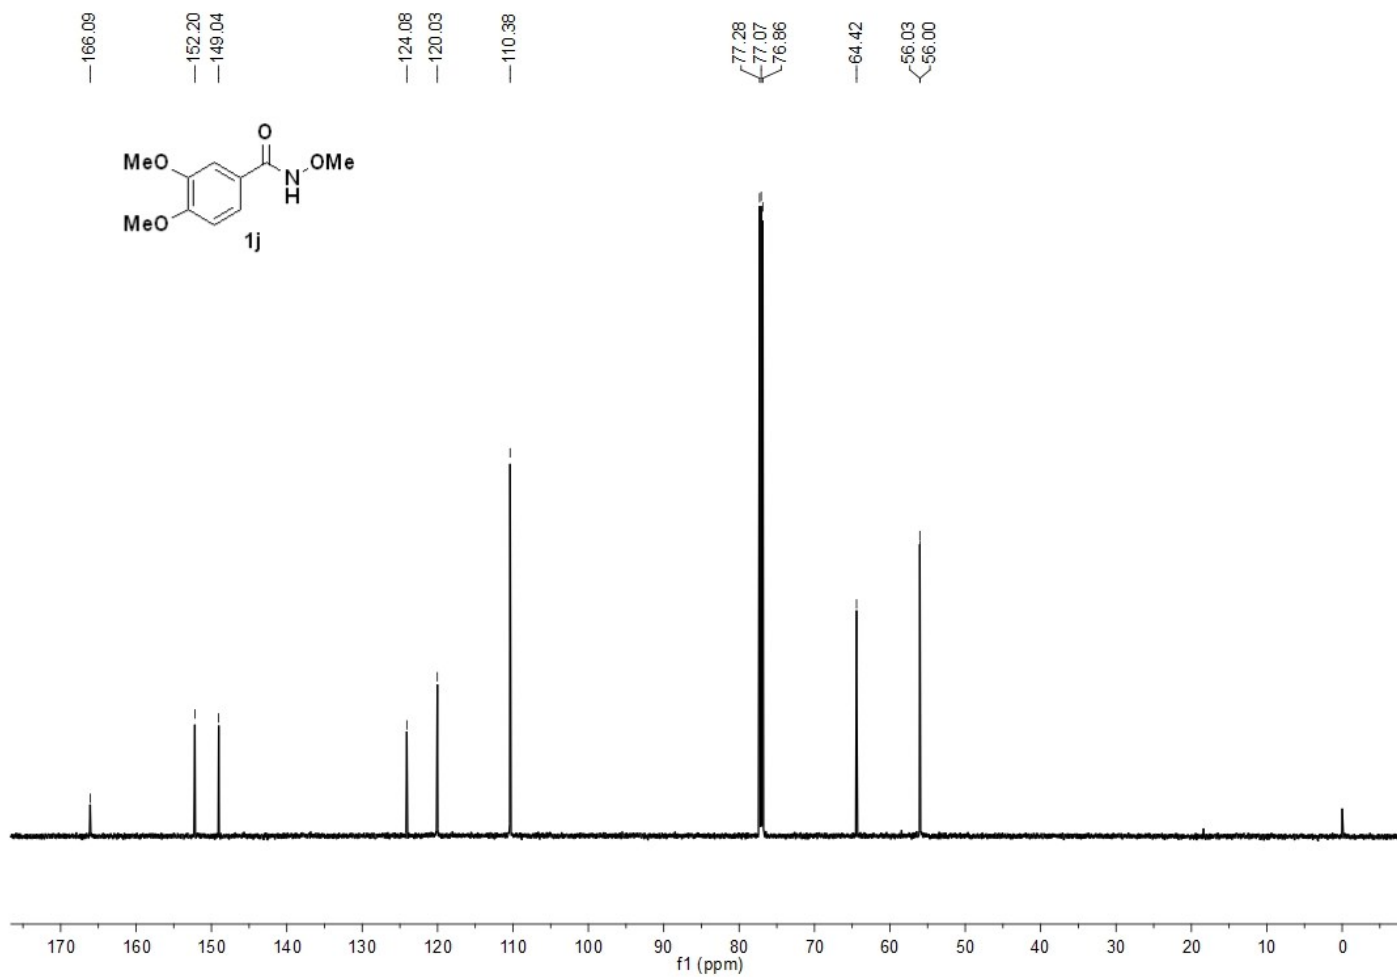



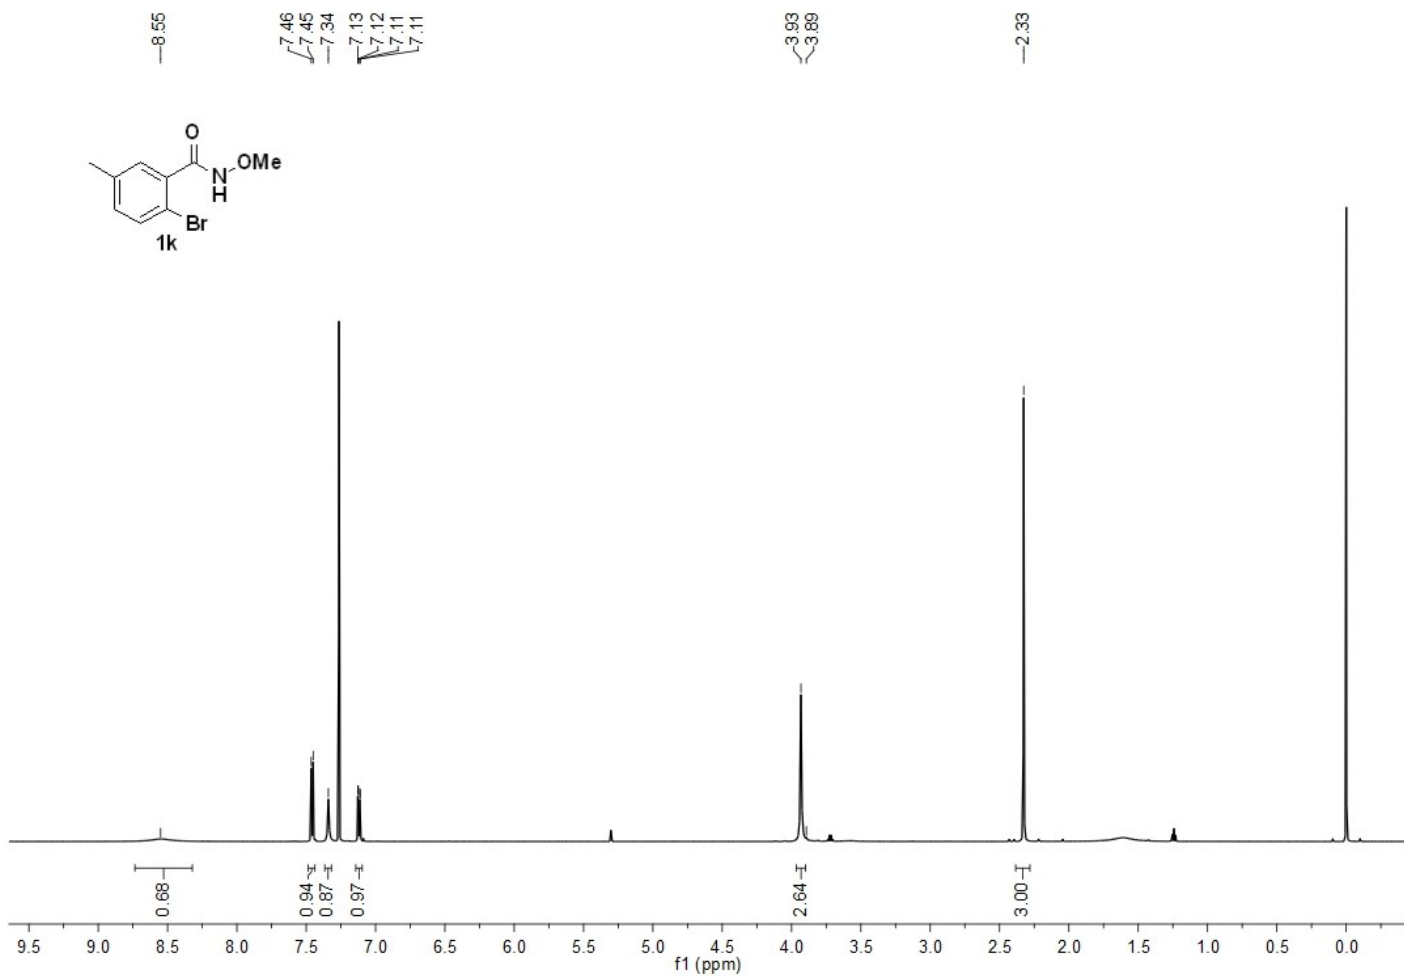

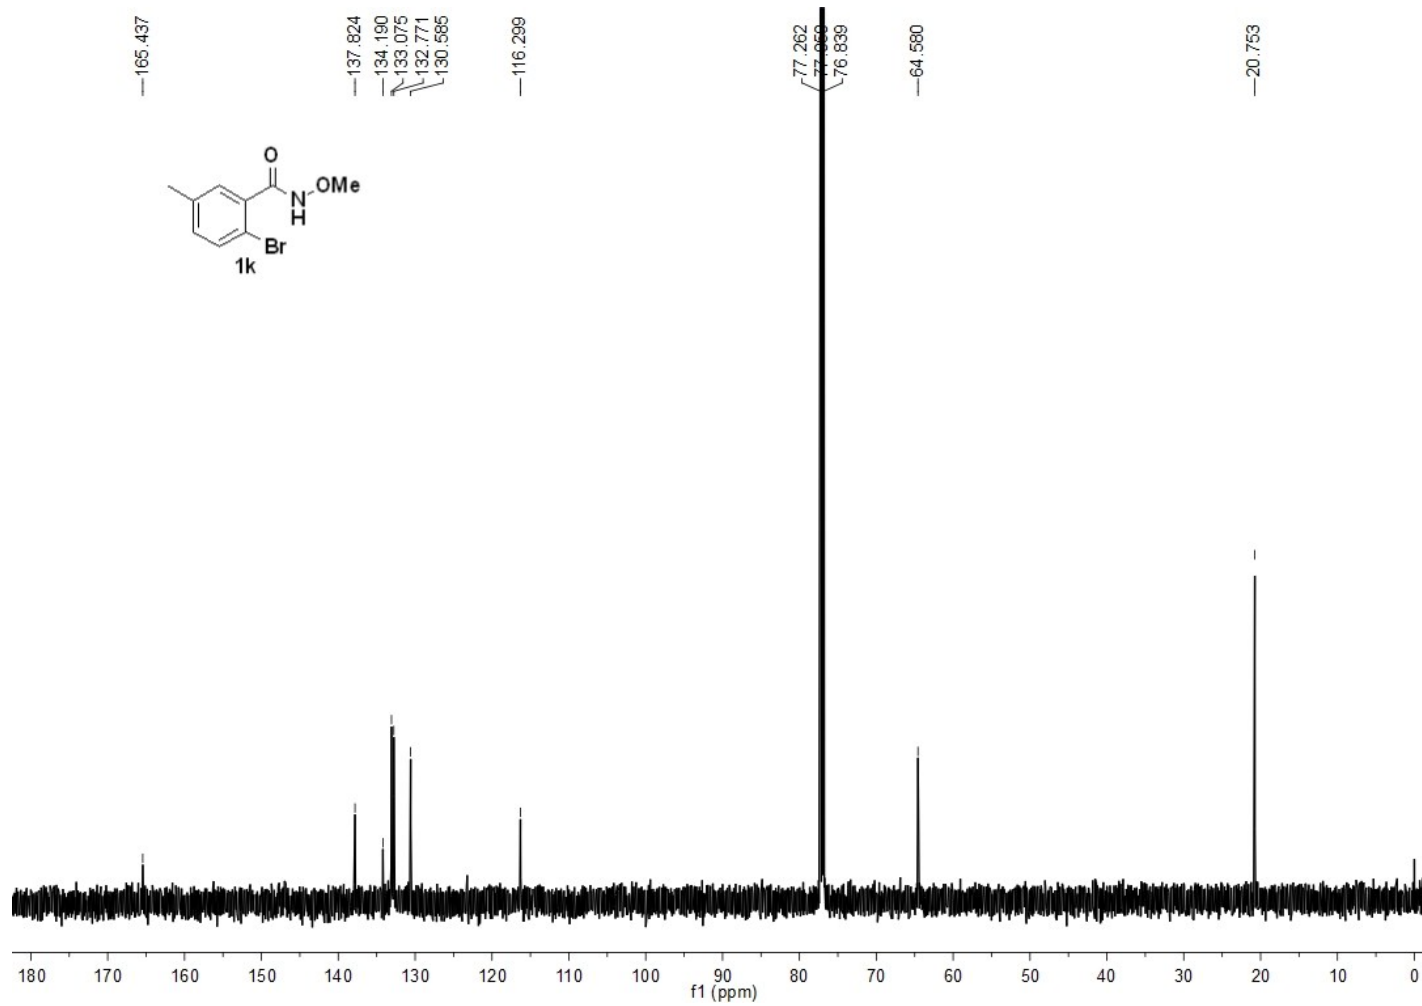

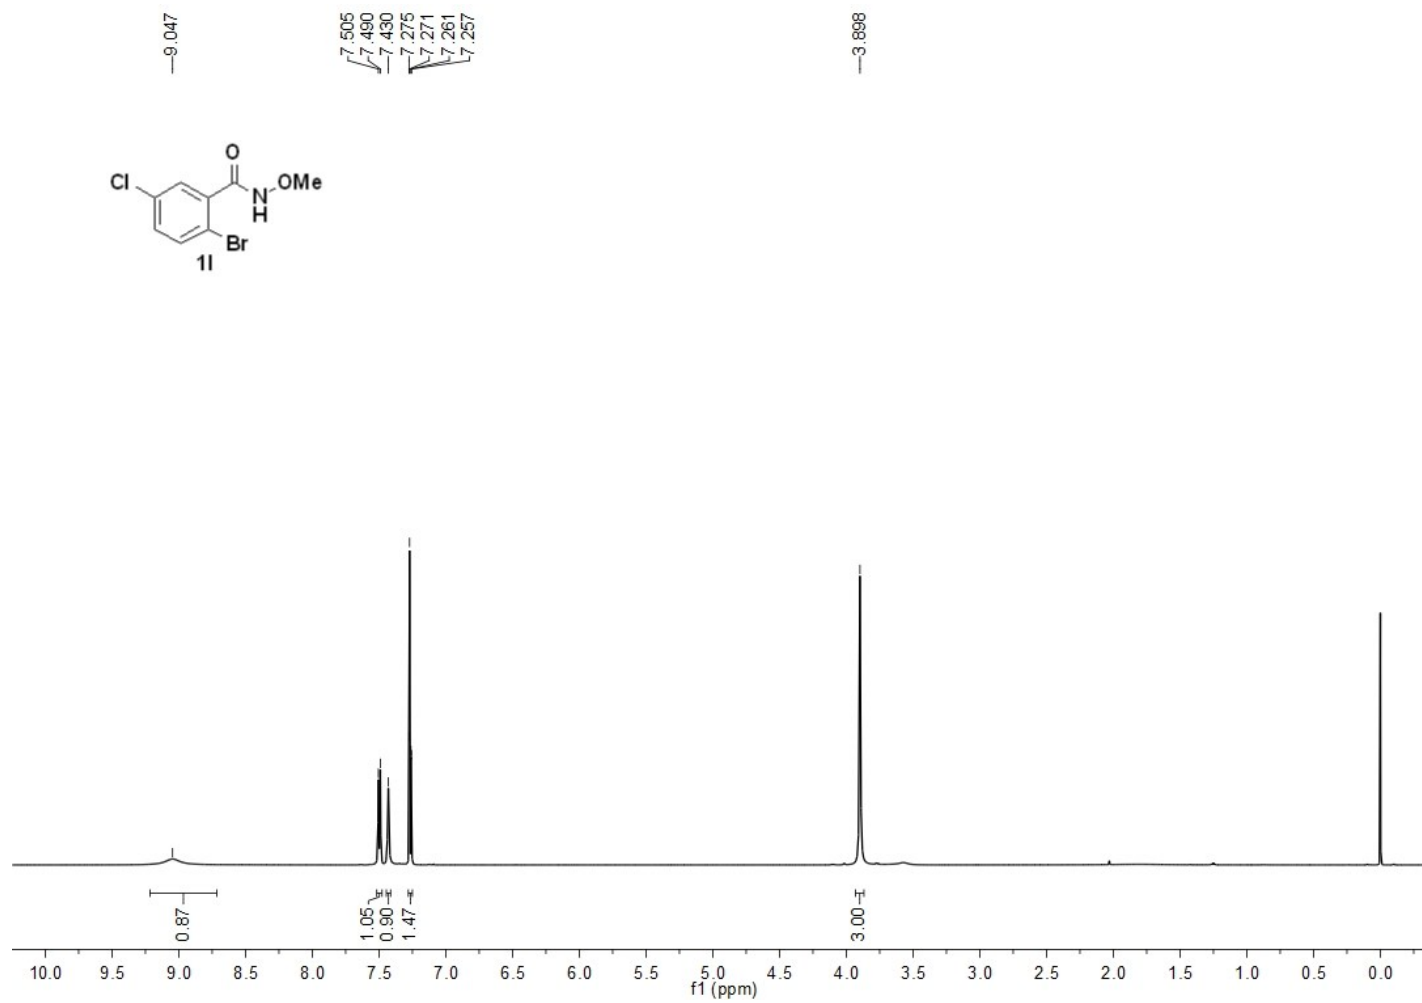

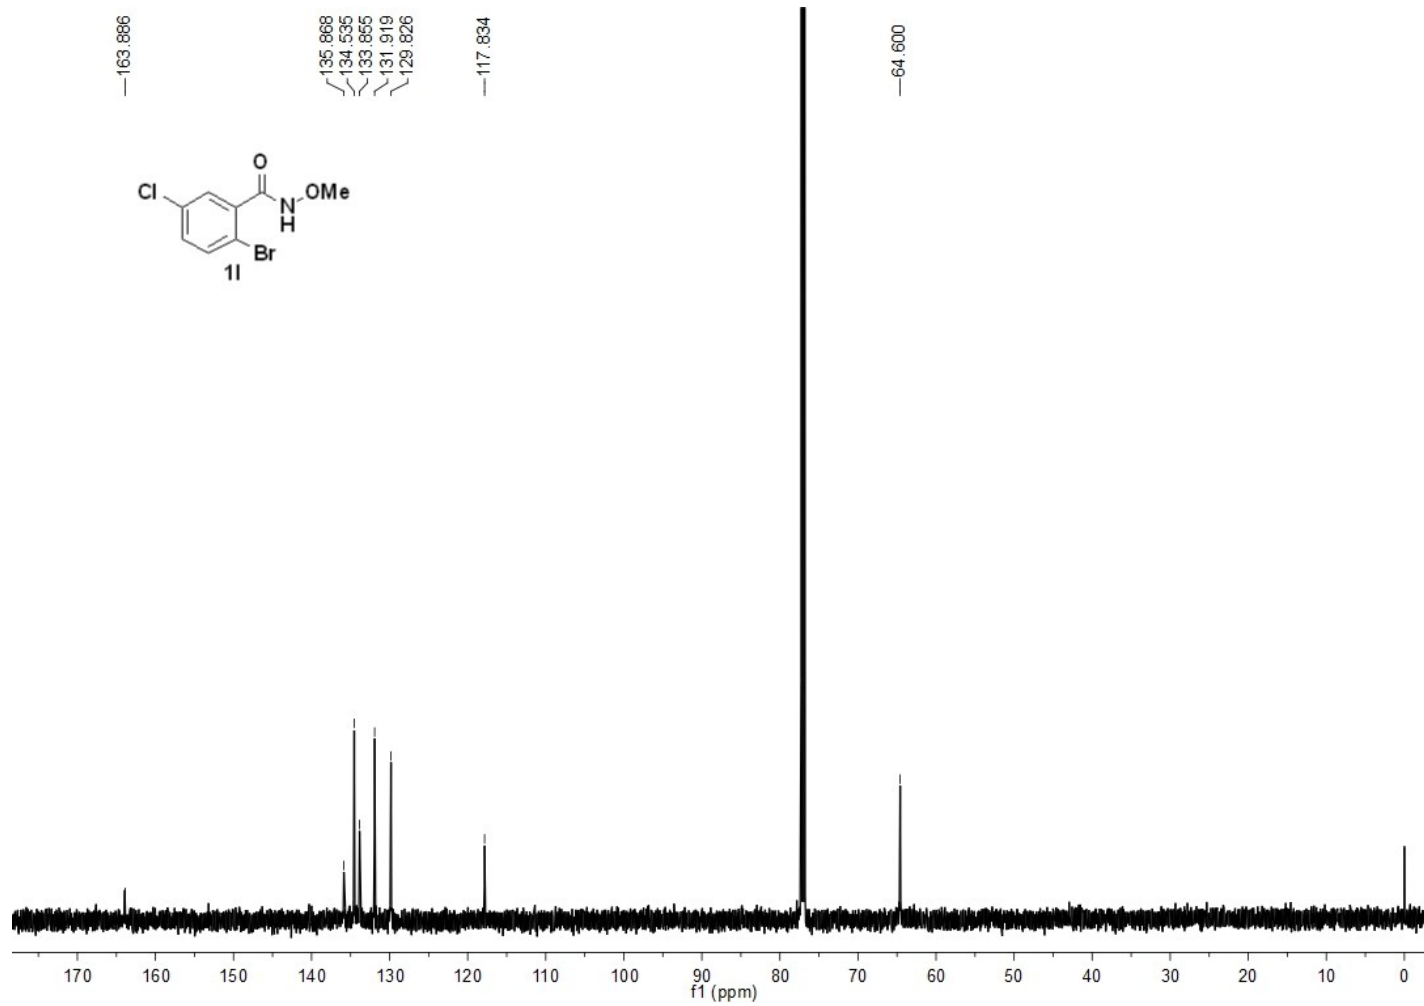

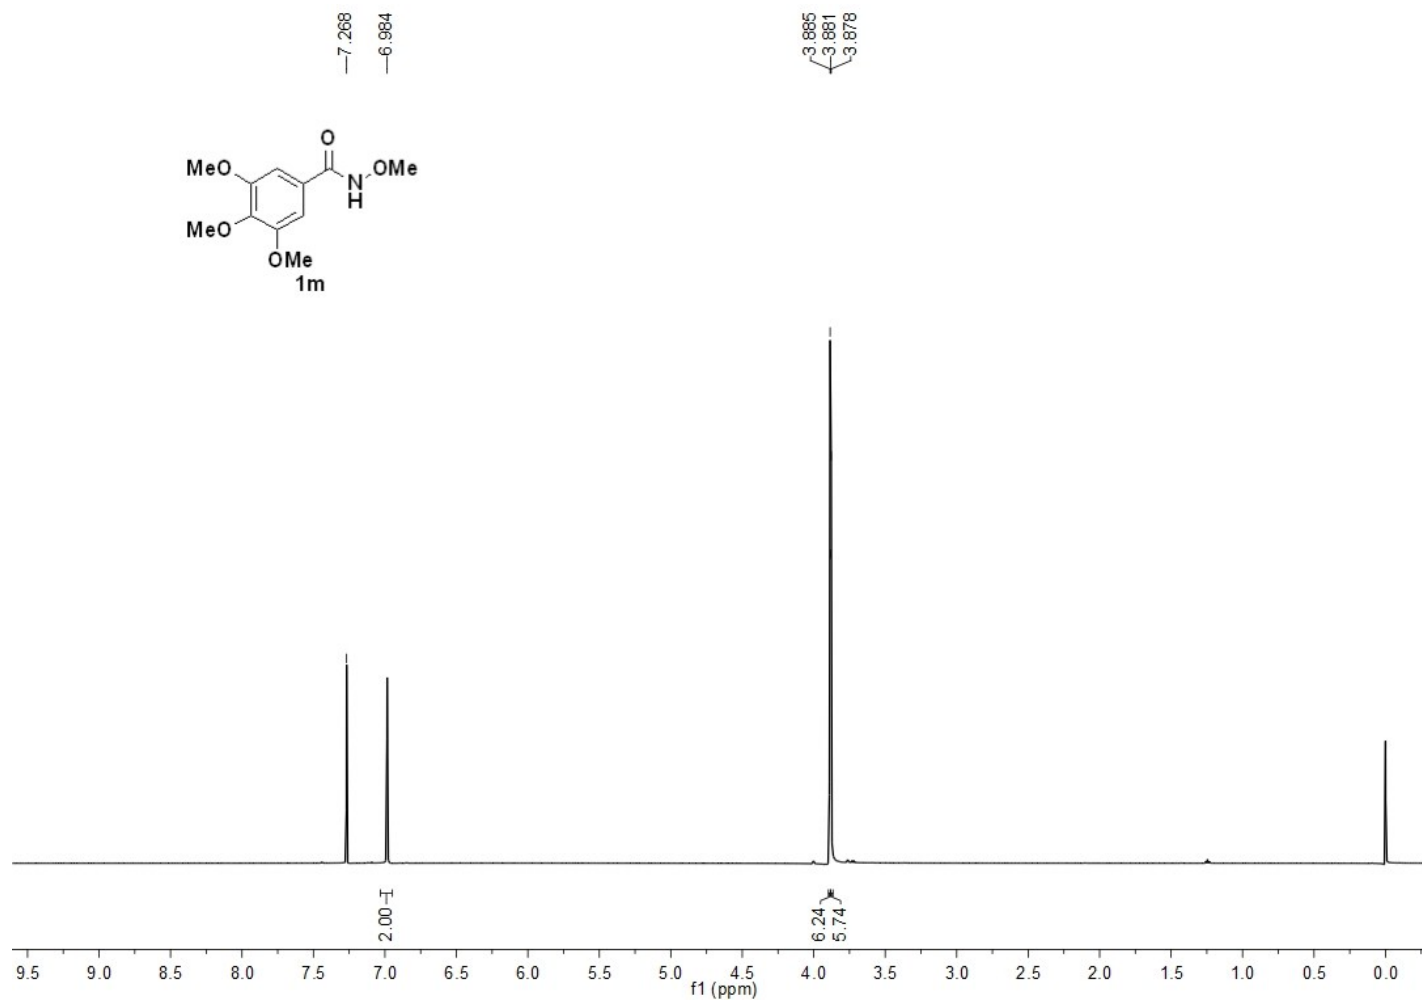

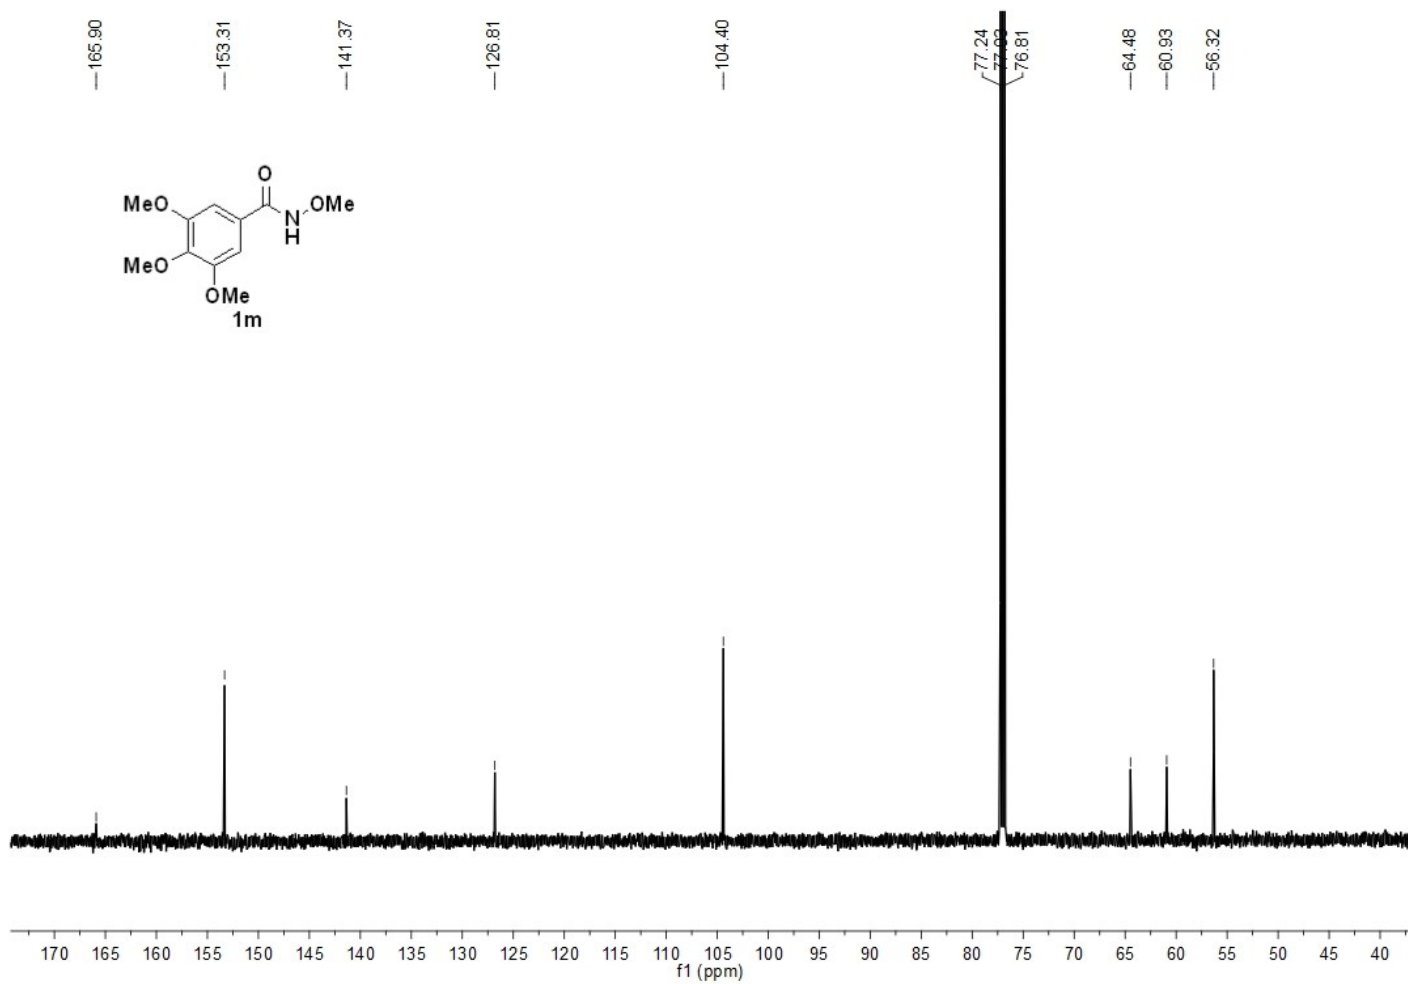

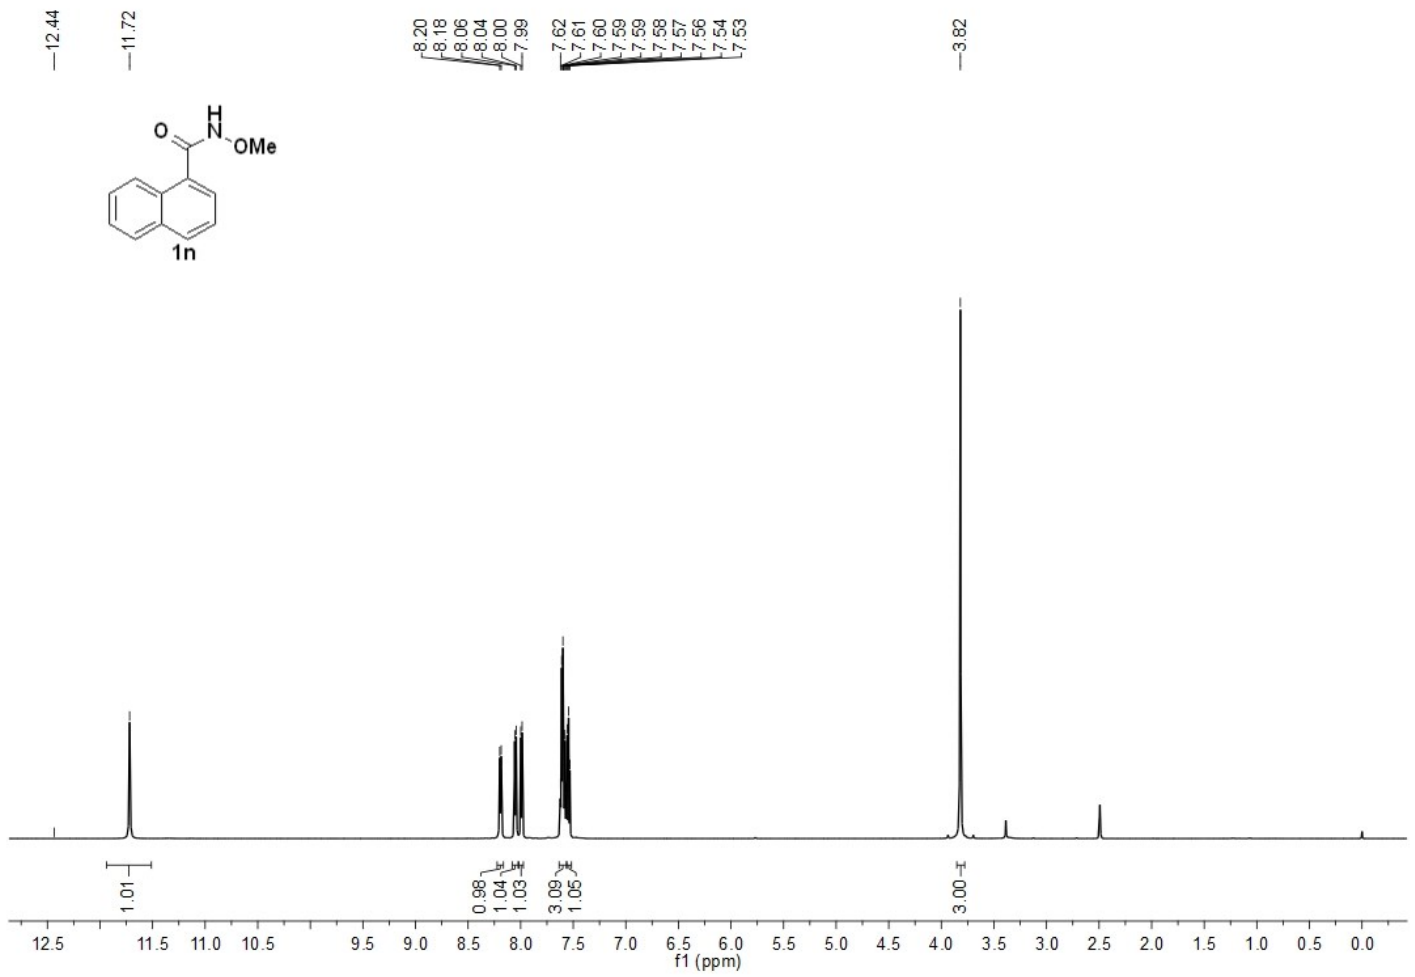

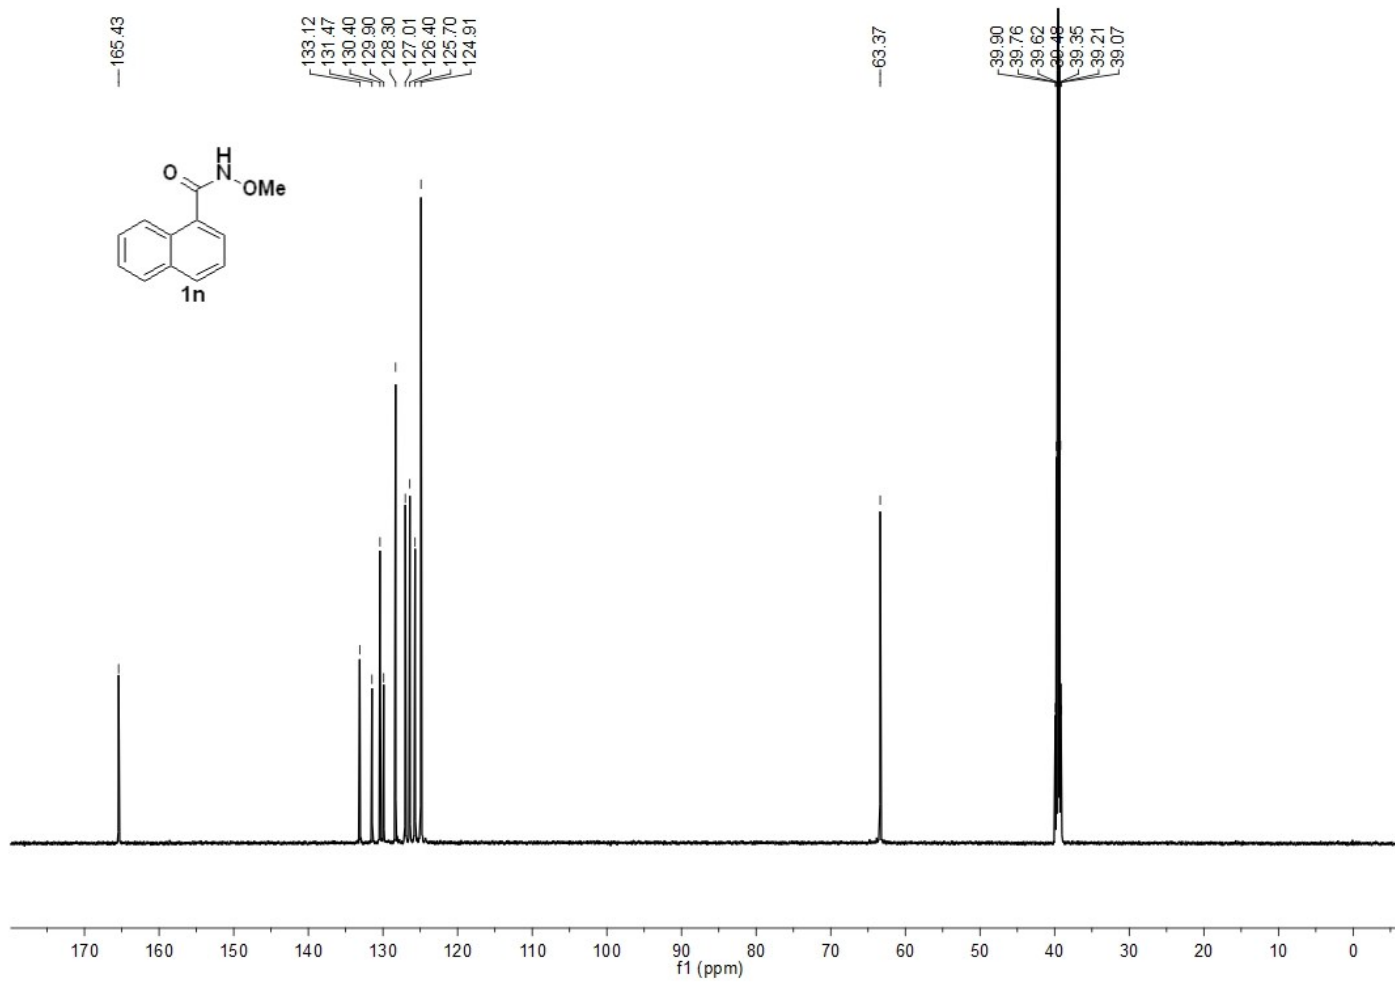



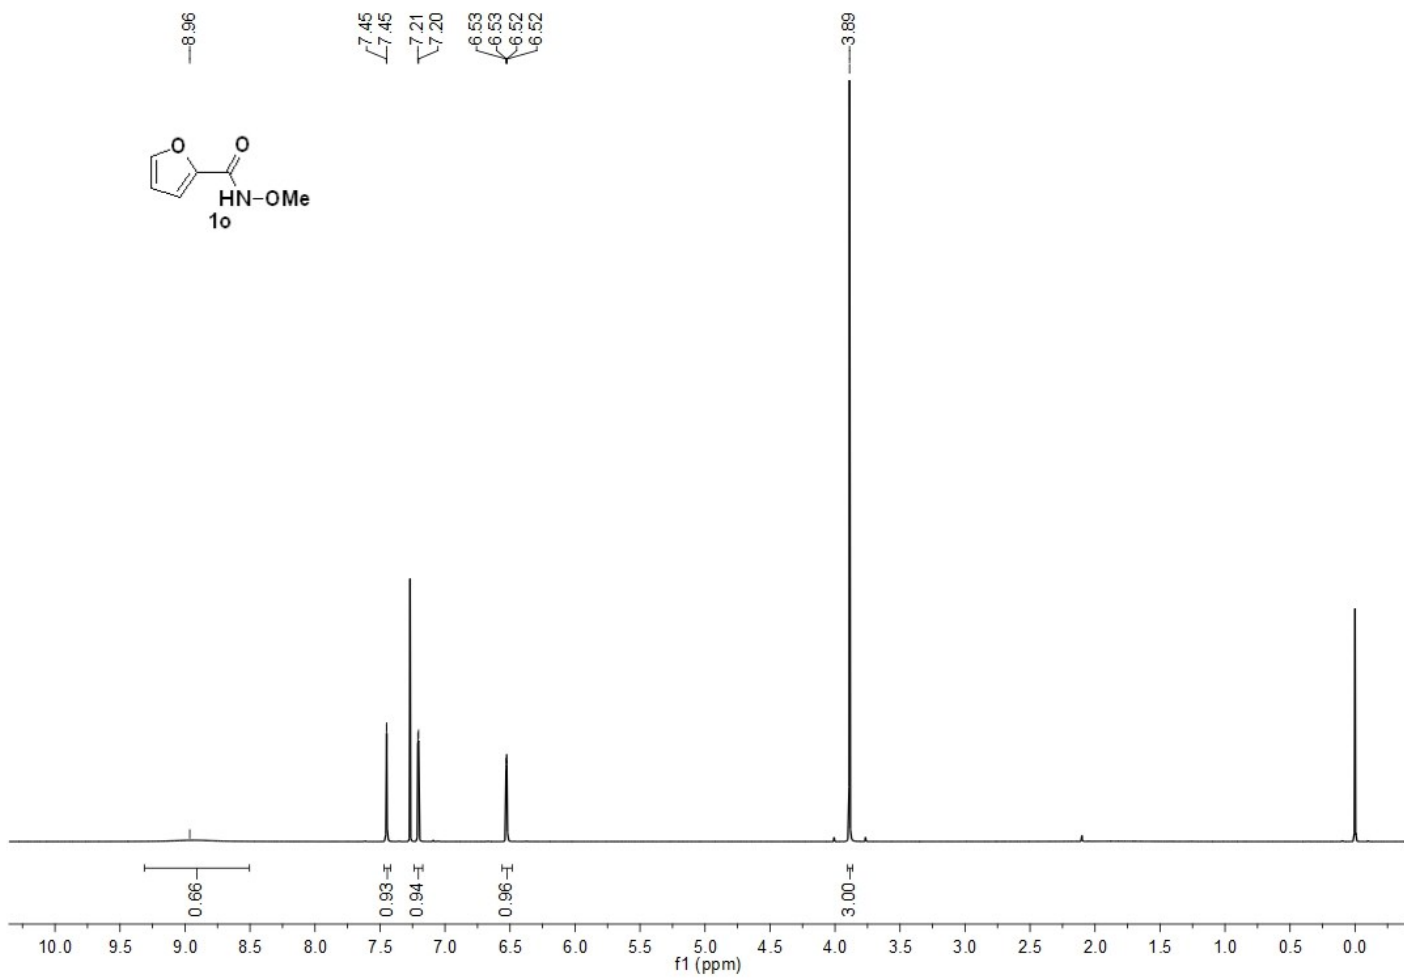

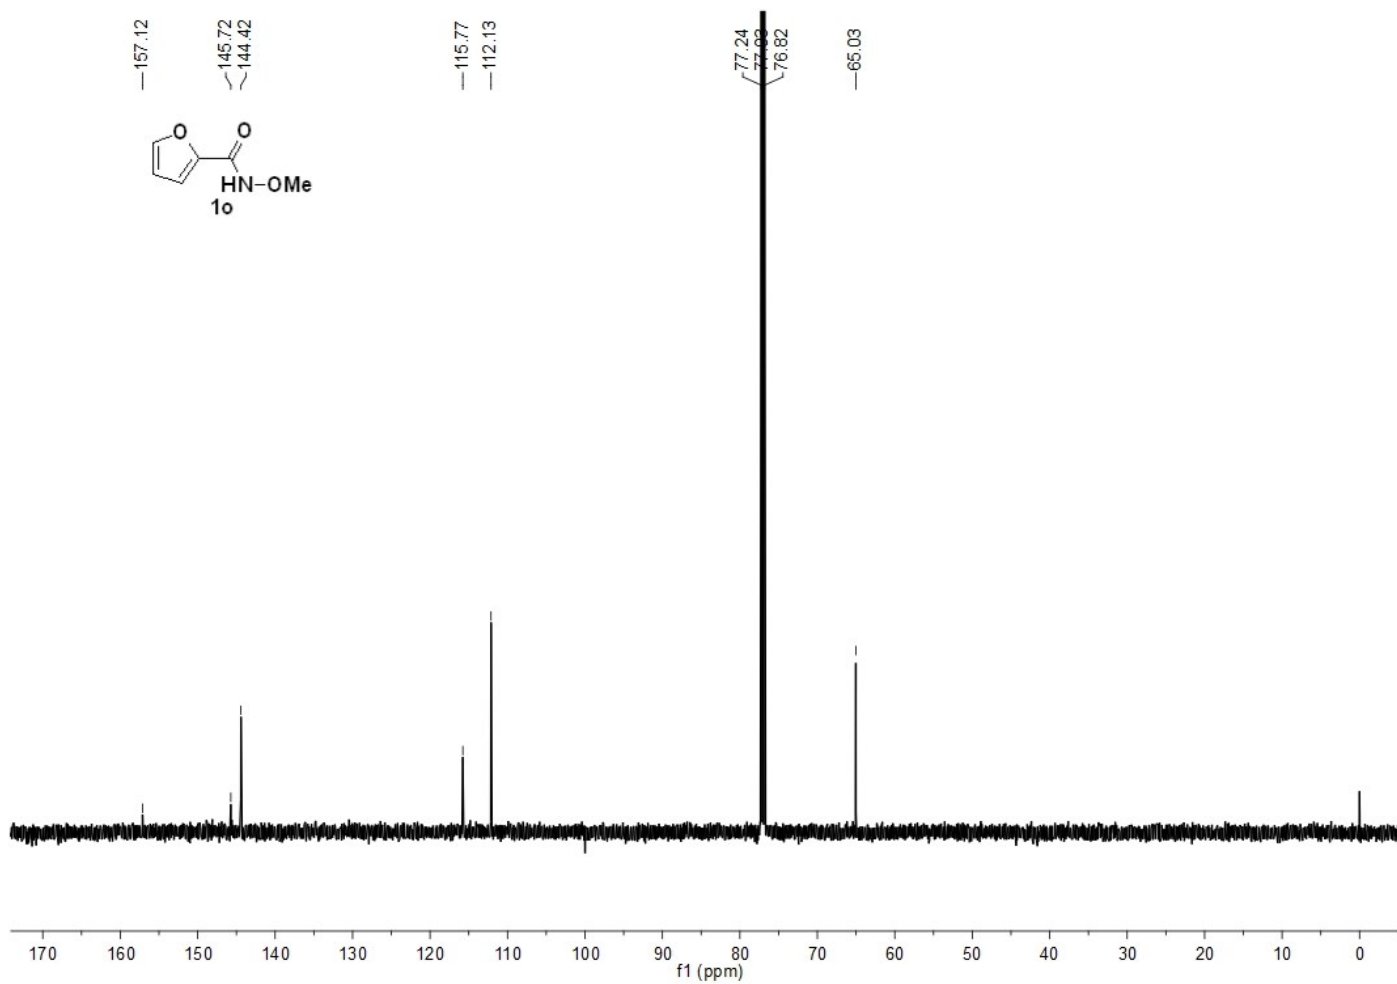

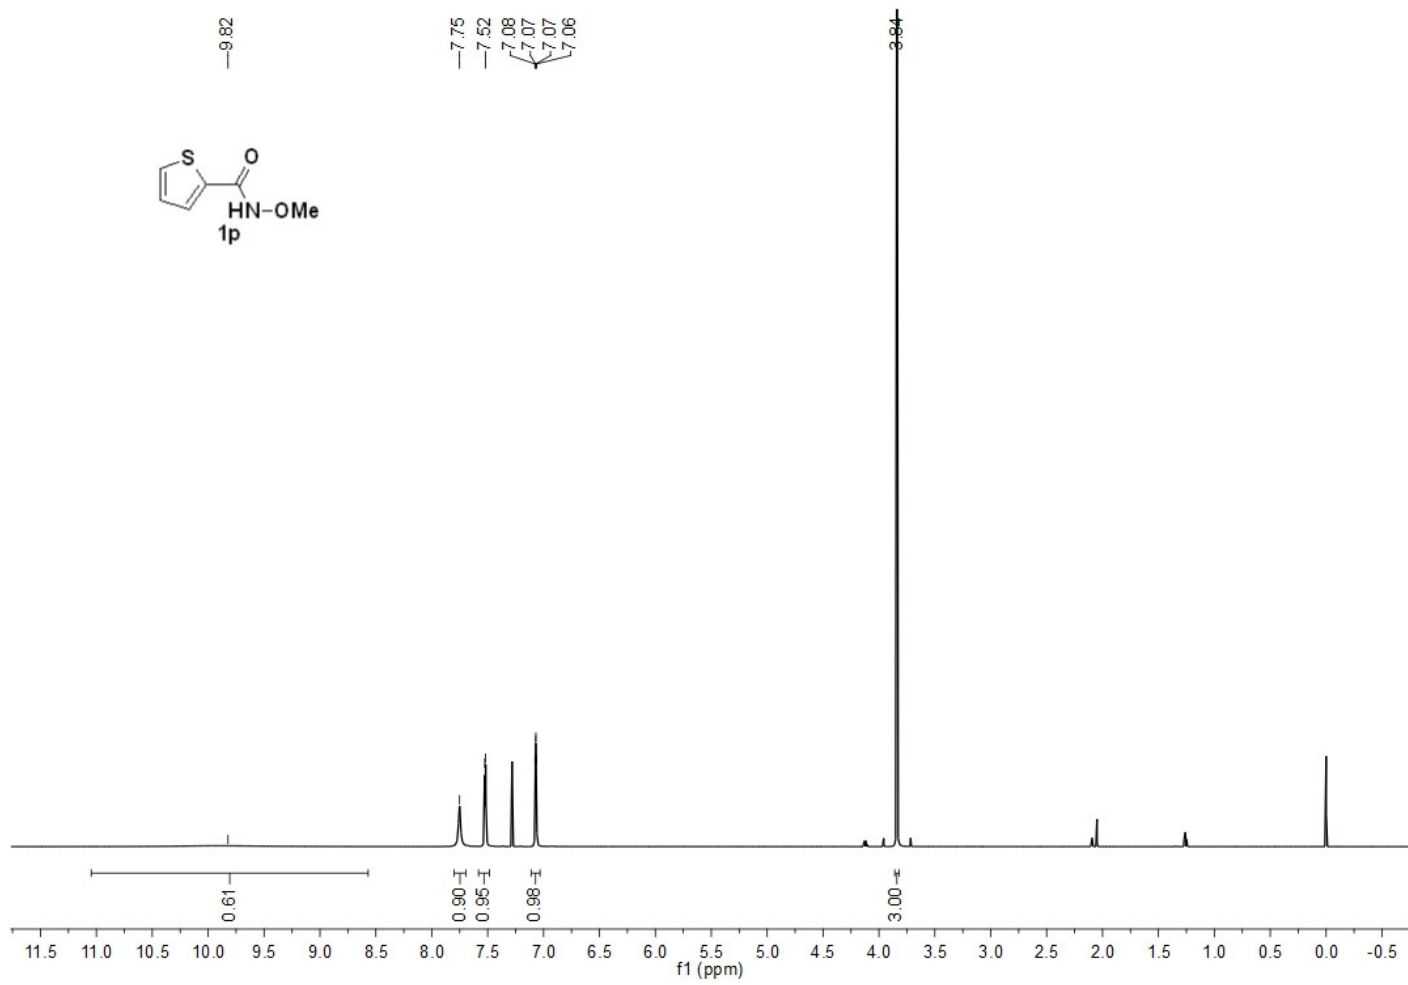

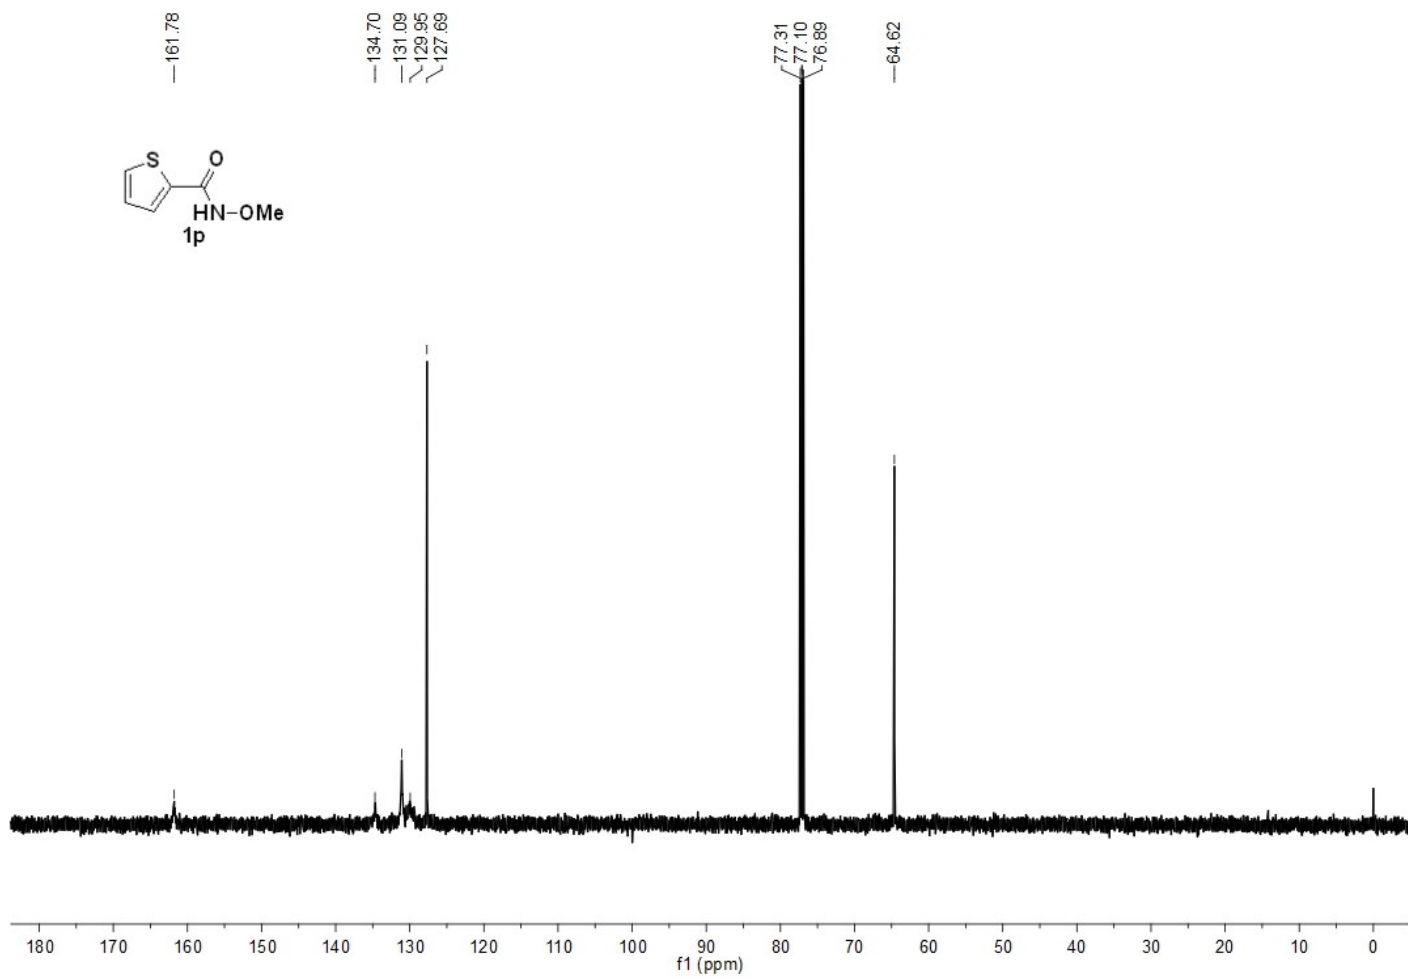

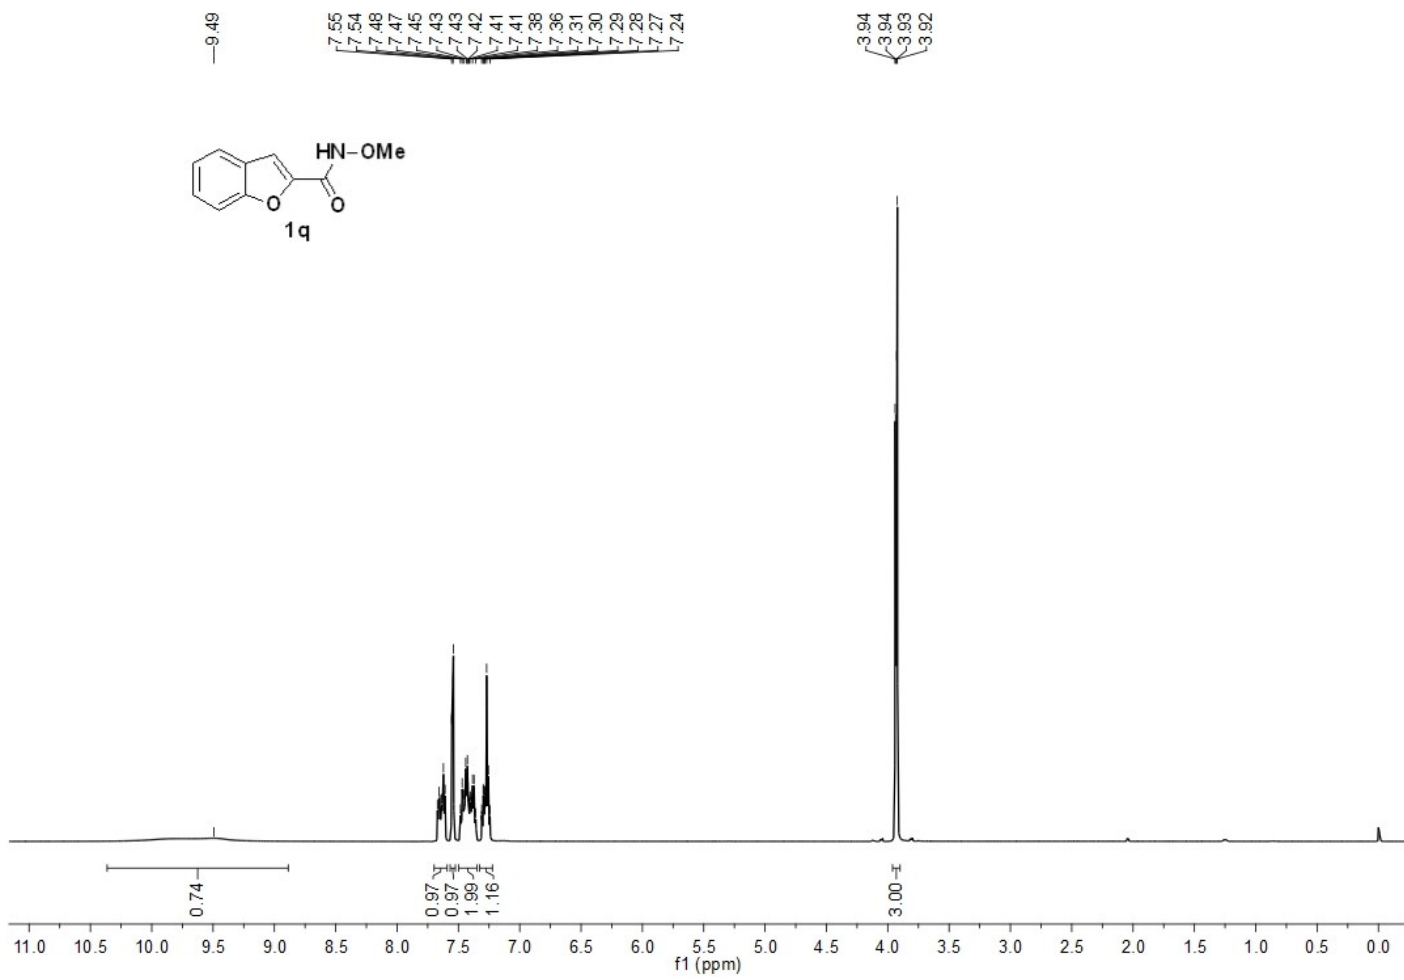

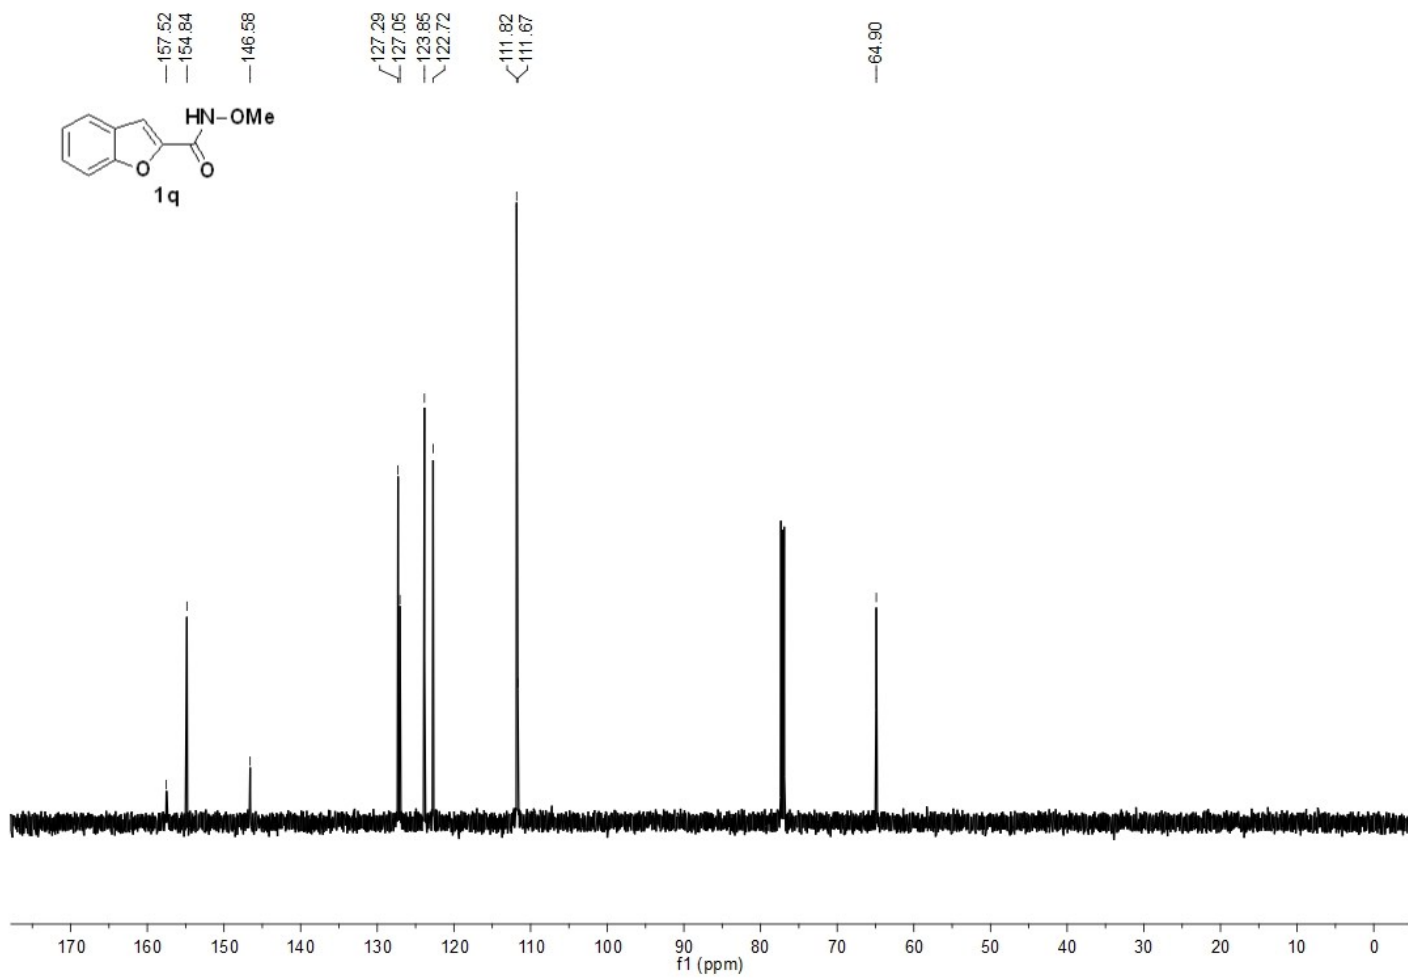

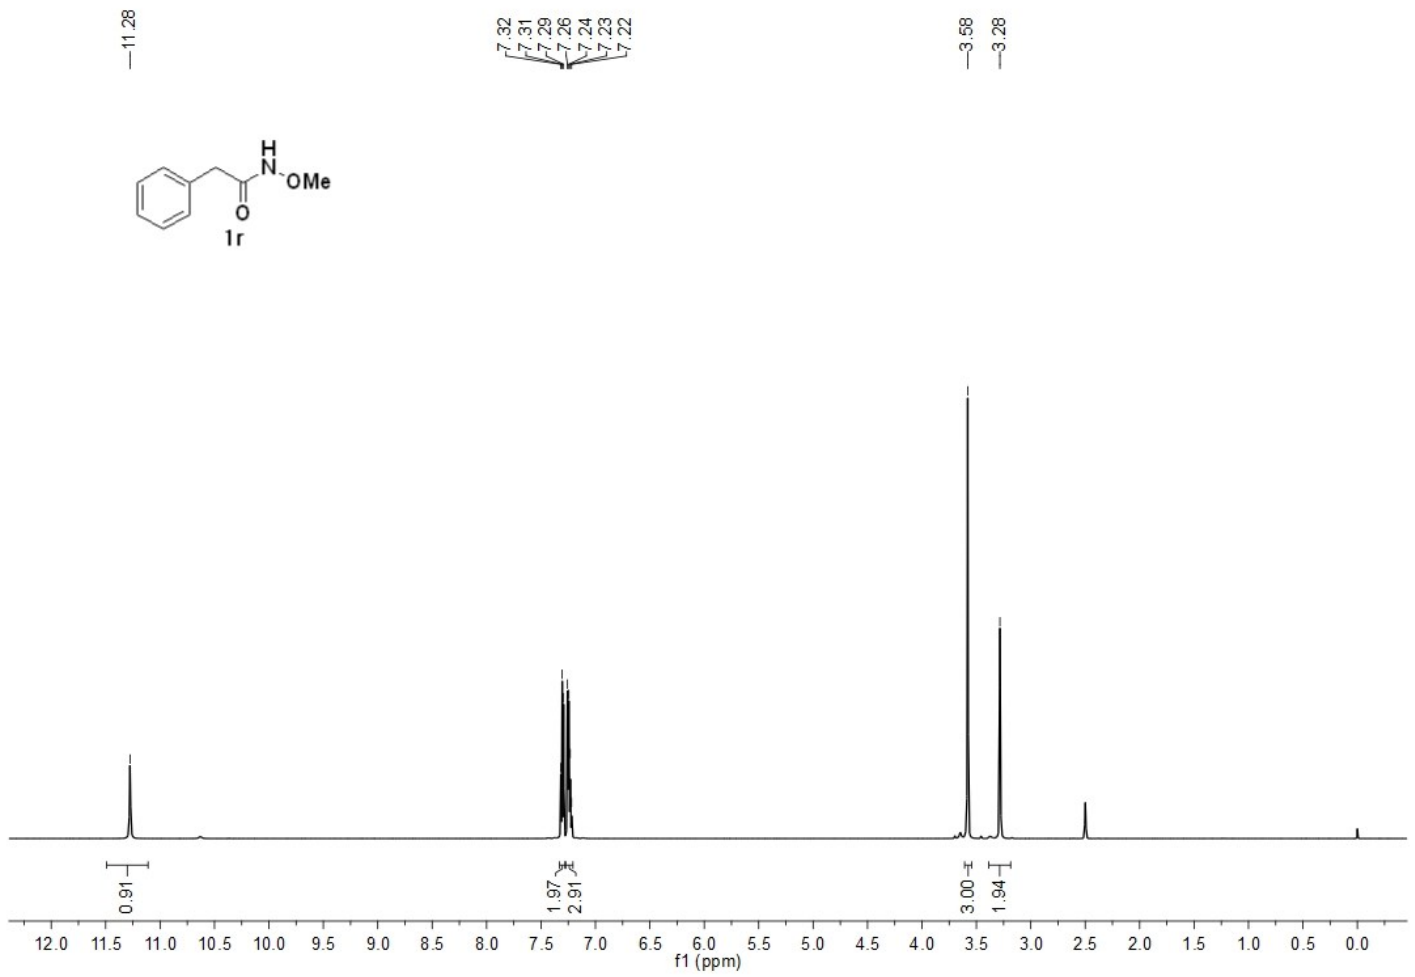

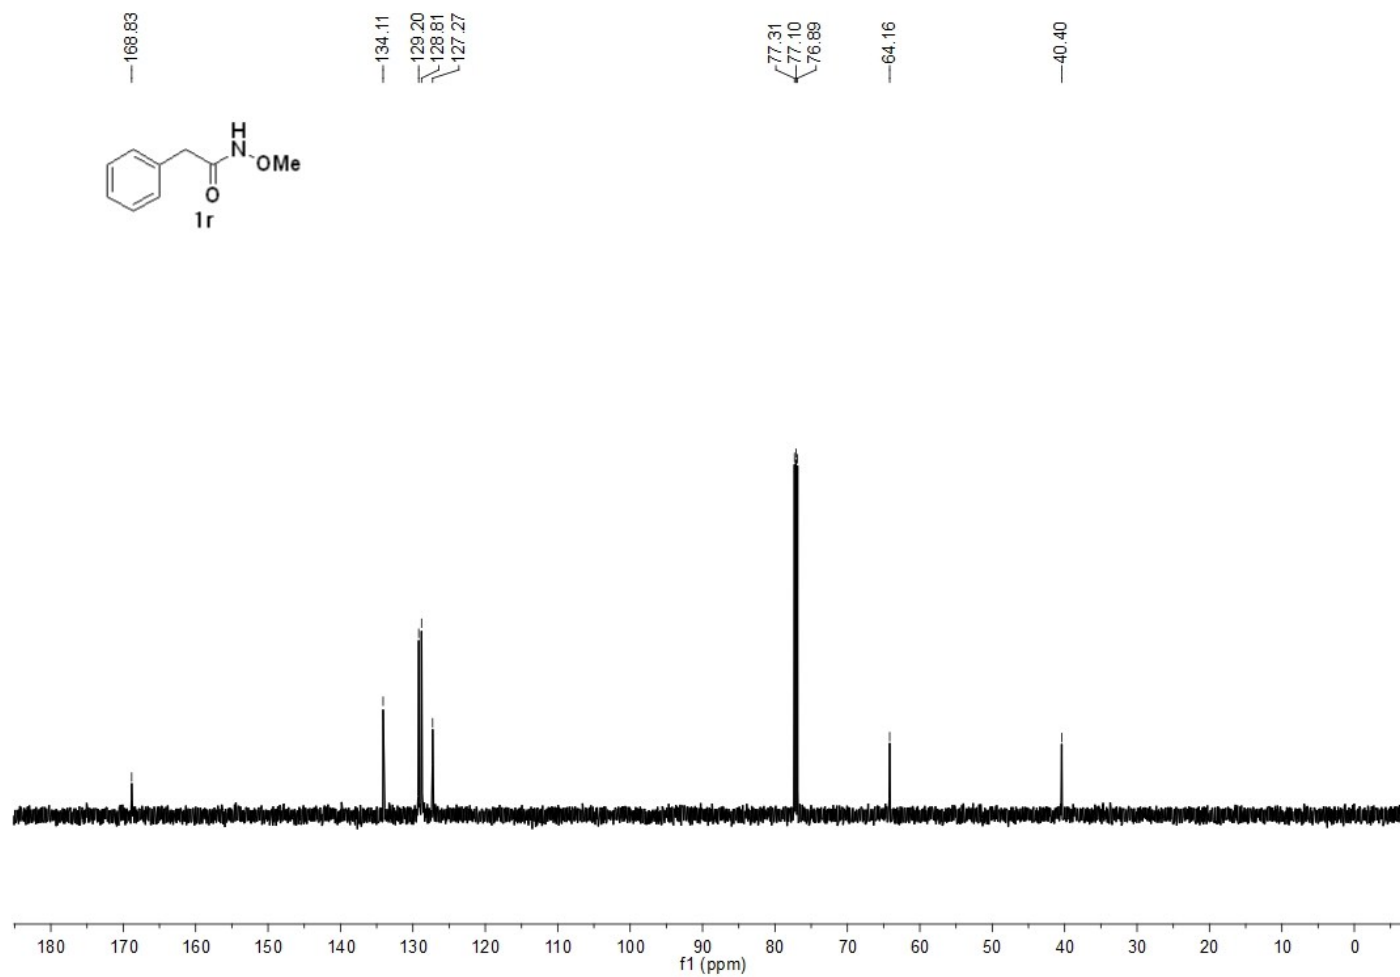



7.537  
7.524  
7.265  
7.218  
7.097  
7.094  
7.084  
7.081  
7.071  
7.068

-3.687

3.113  
3.100  
3.087

-2.405

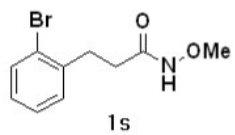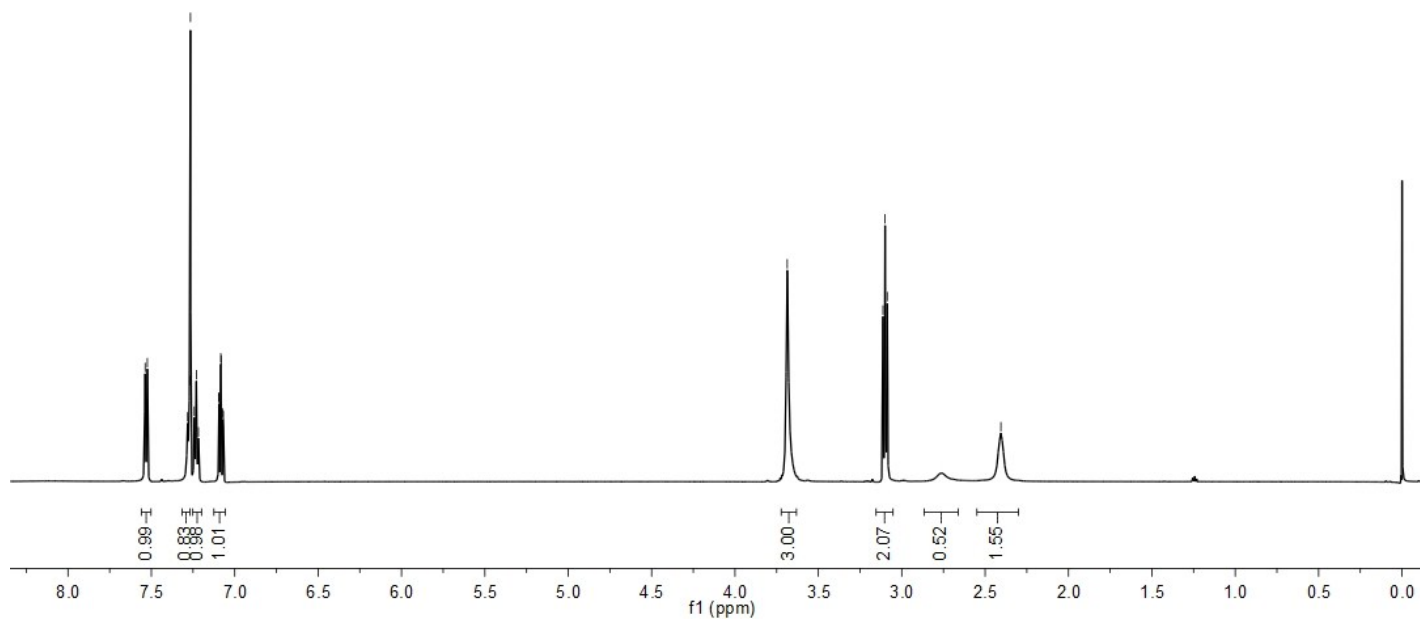

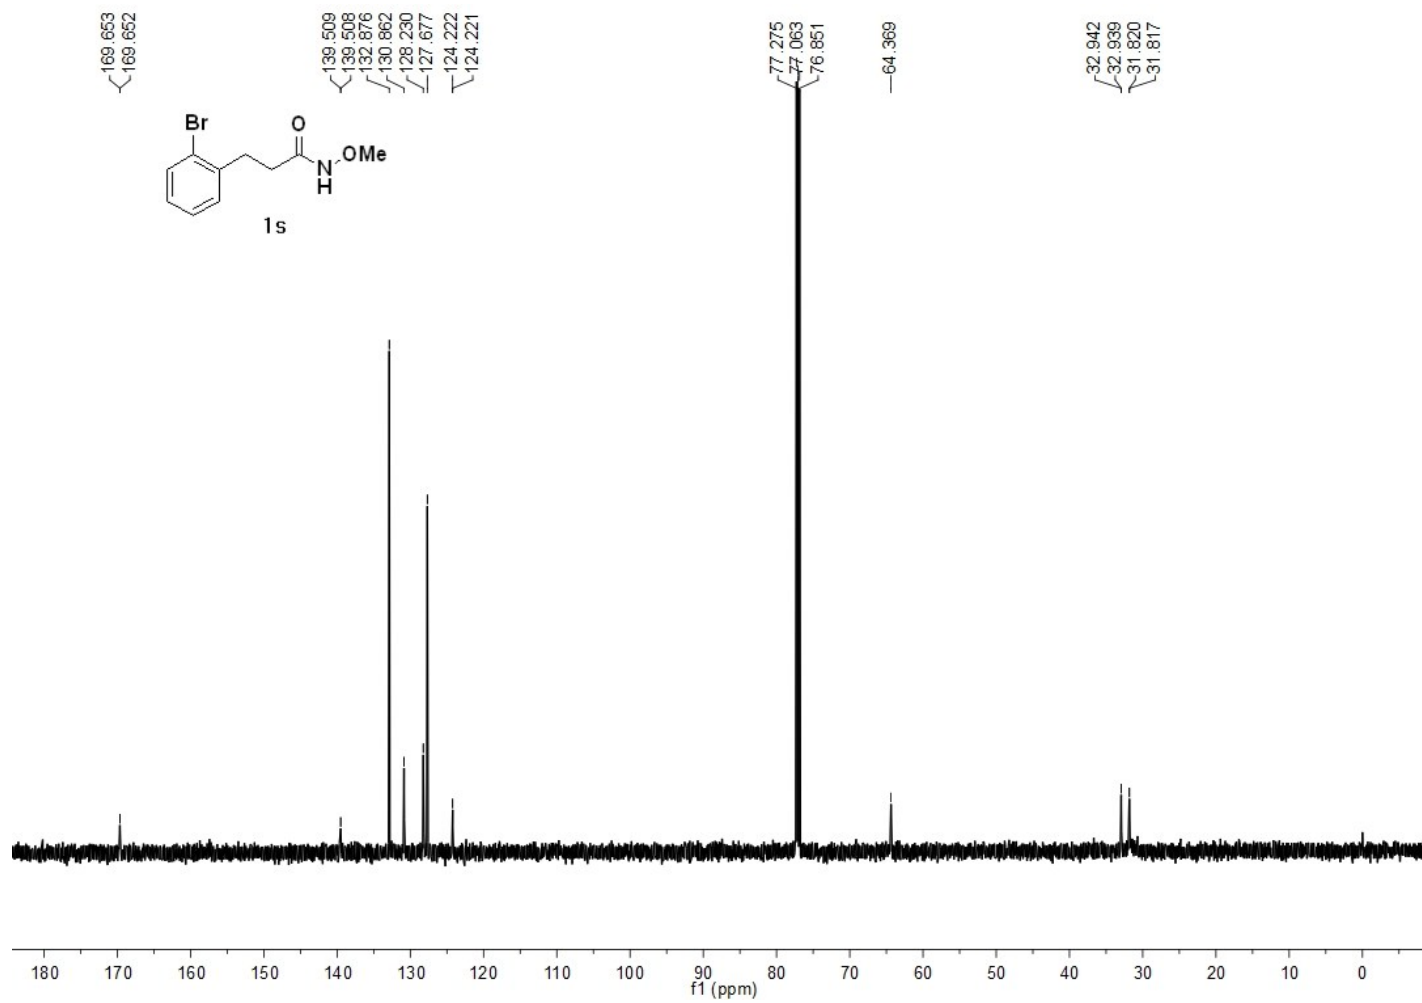

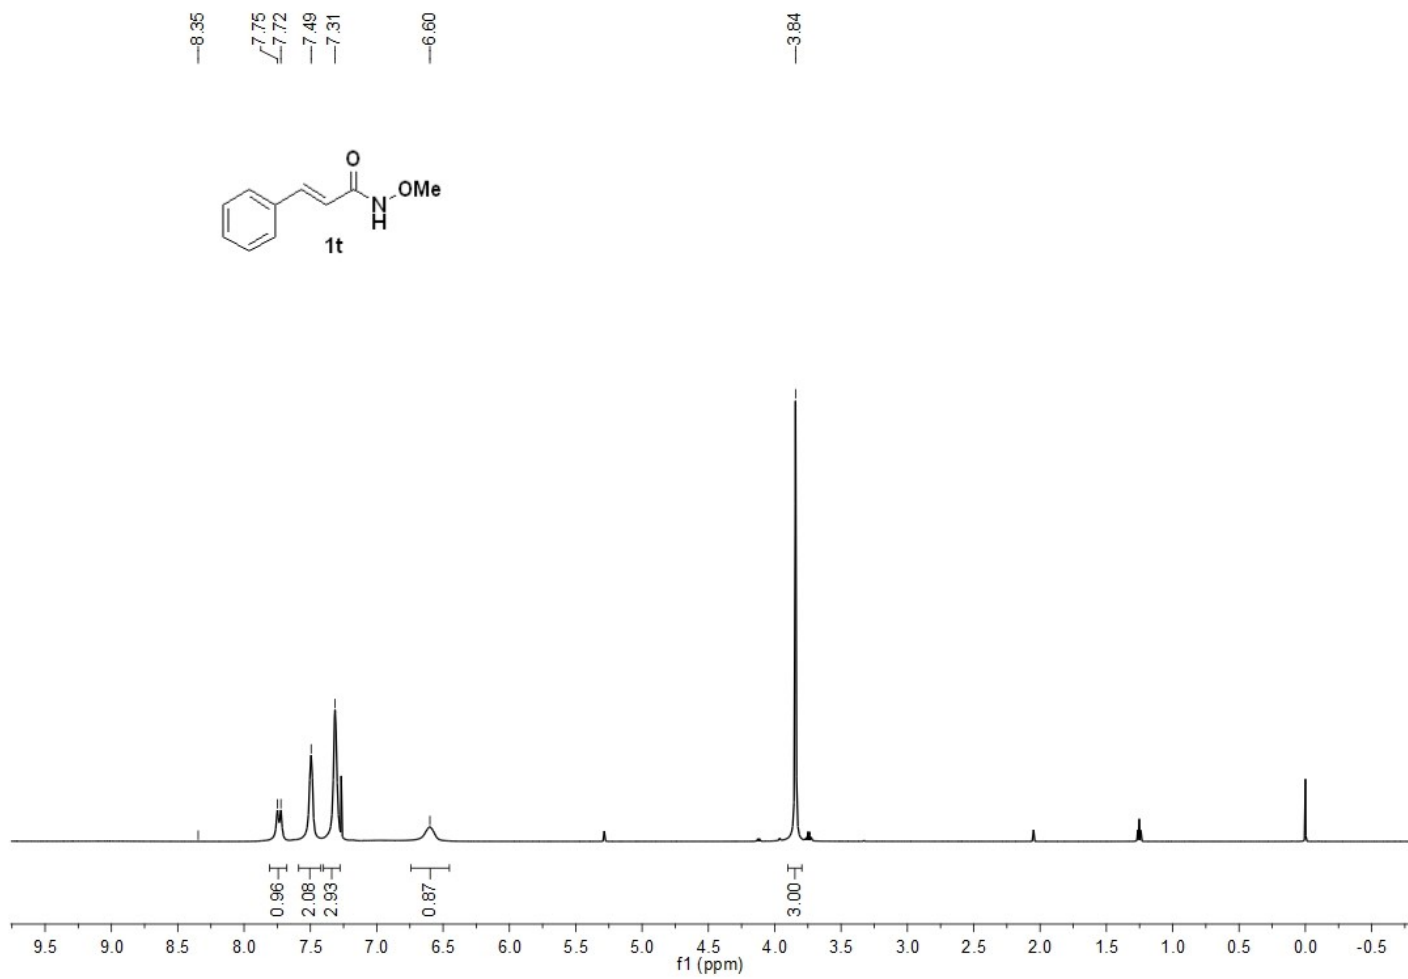

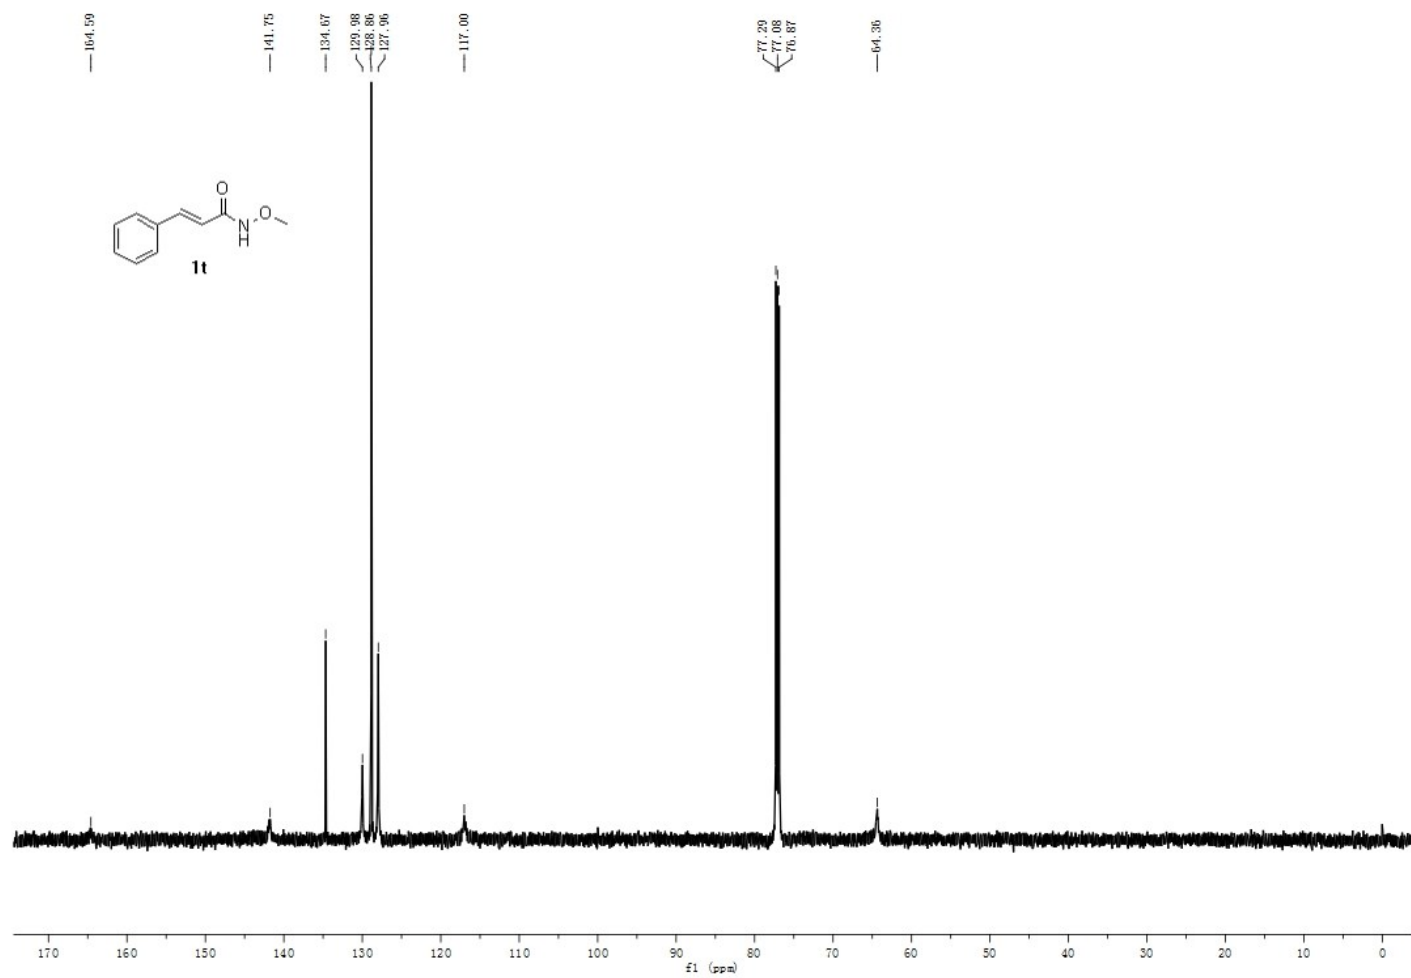

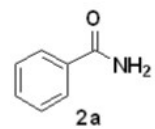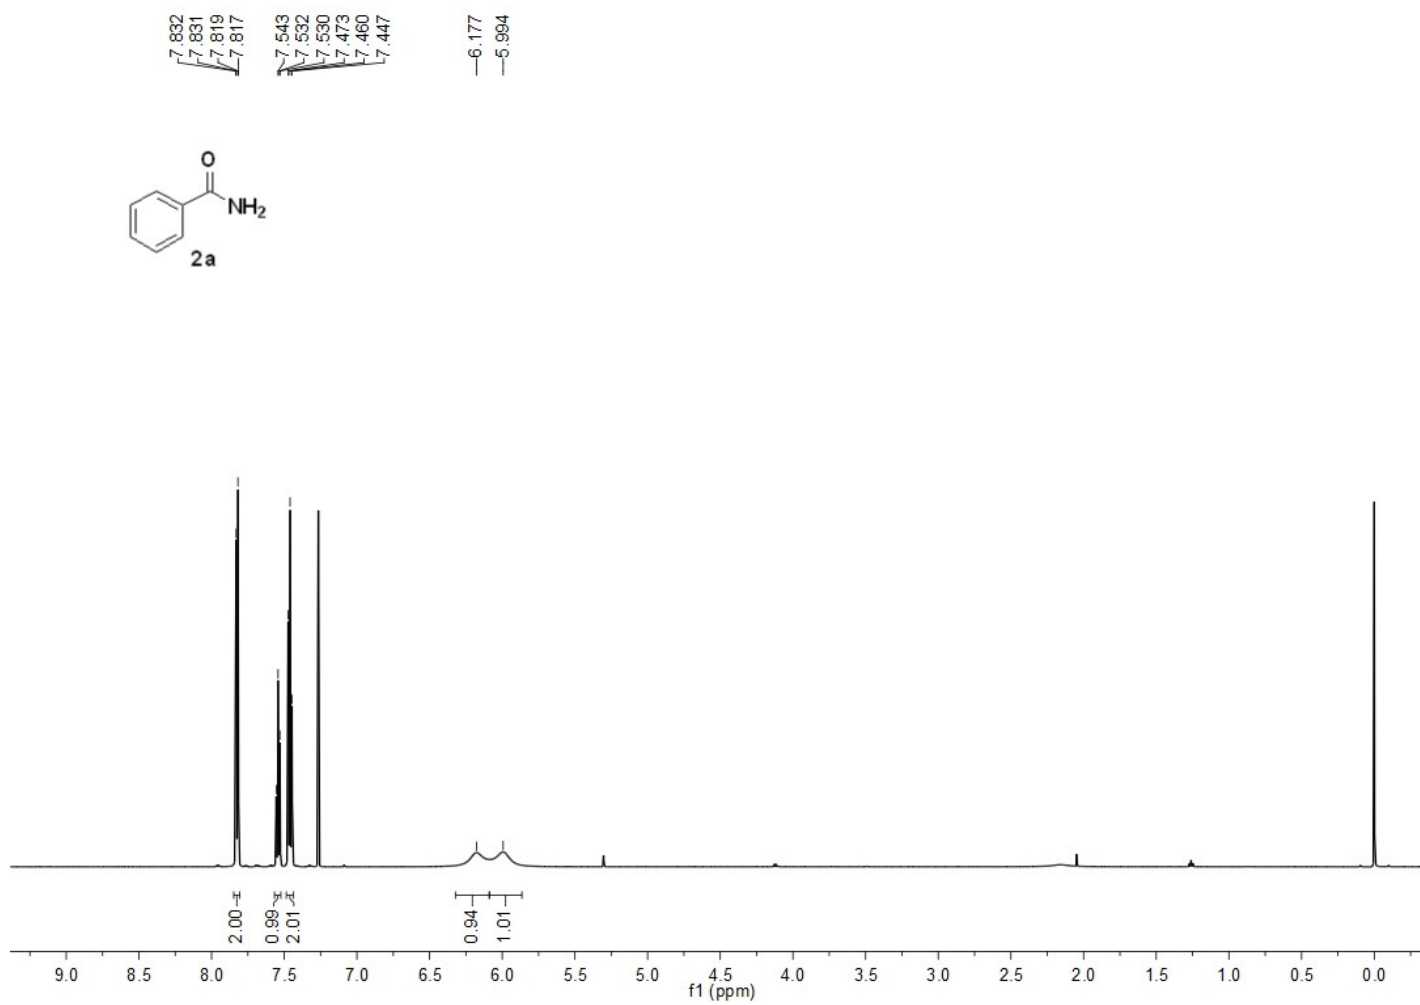

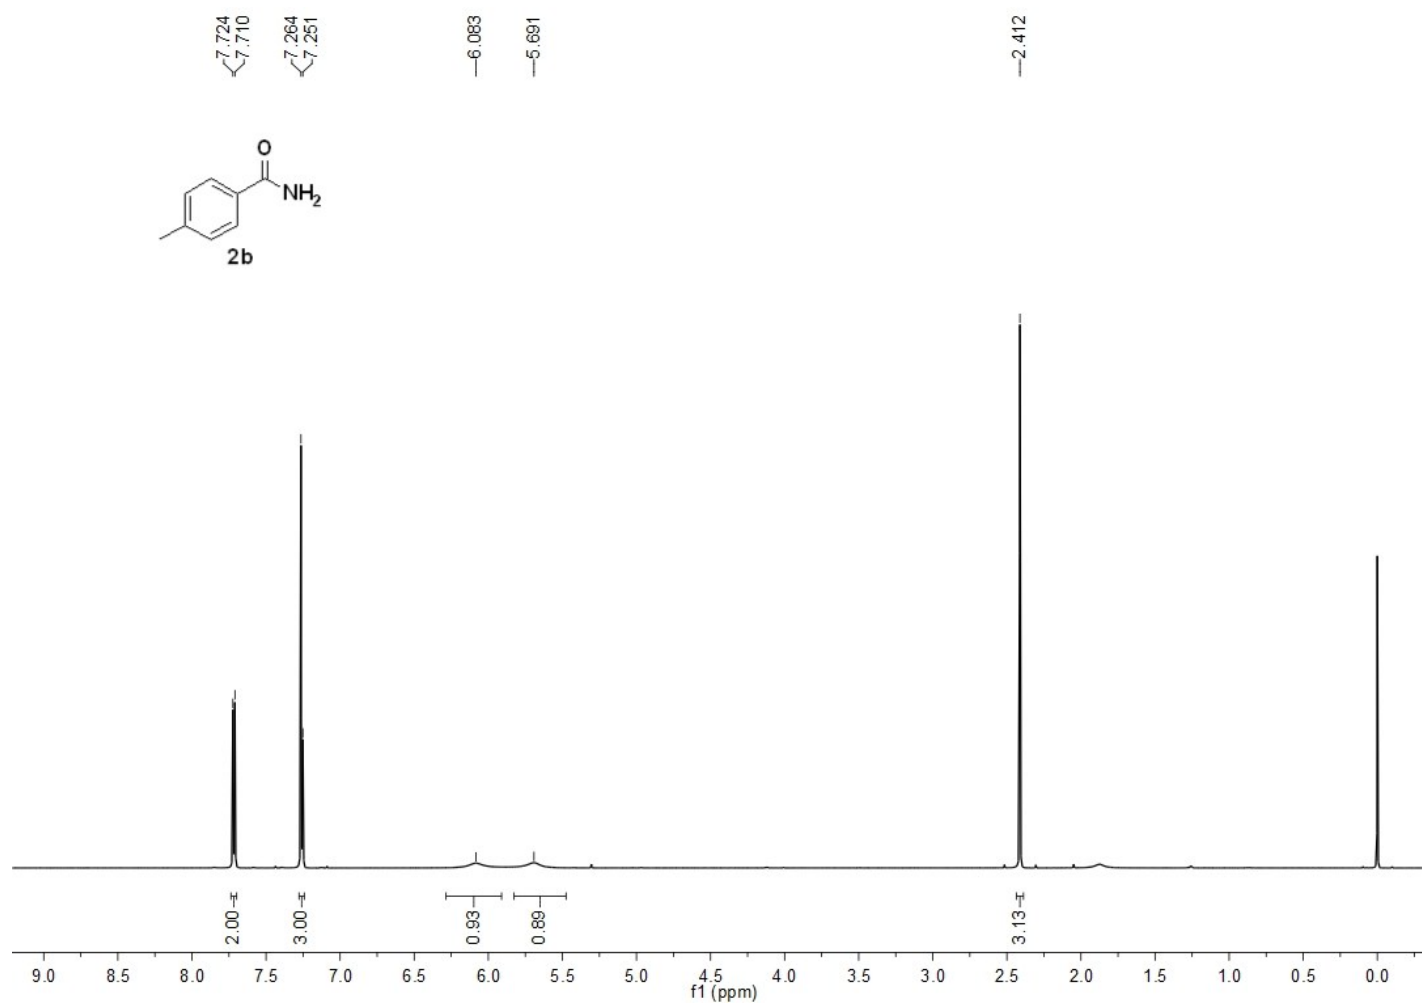

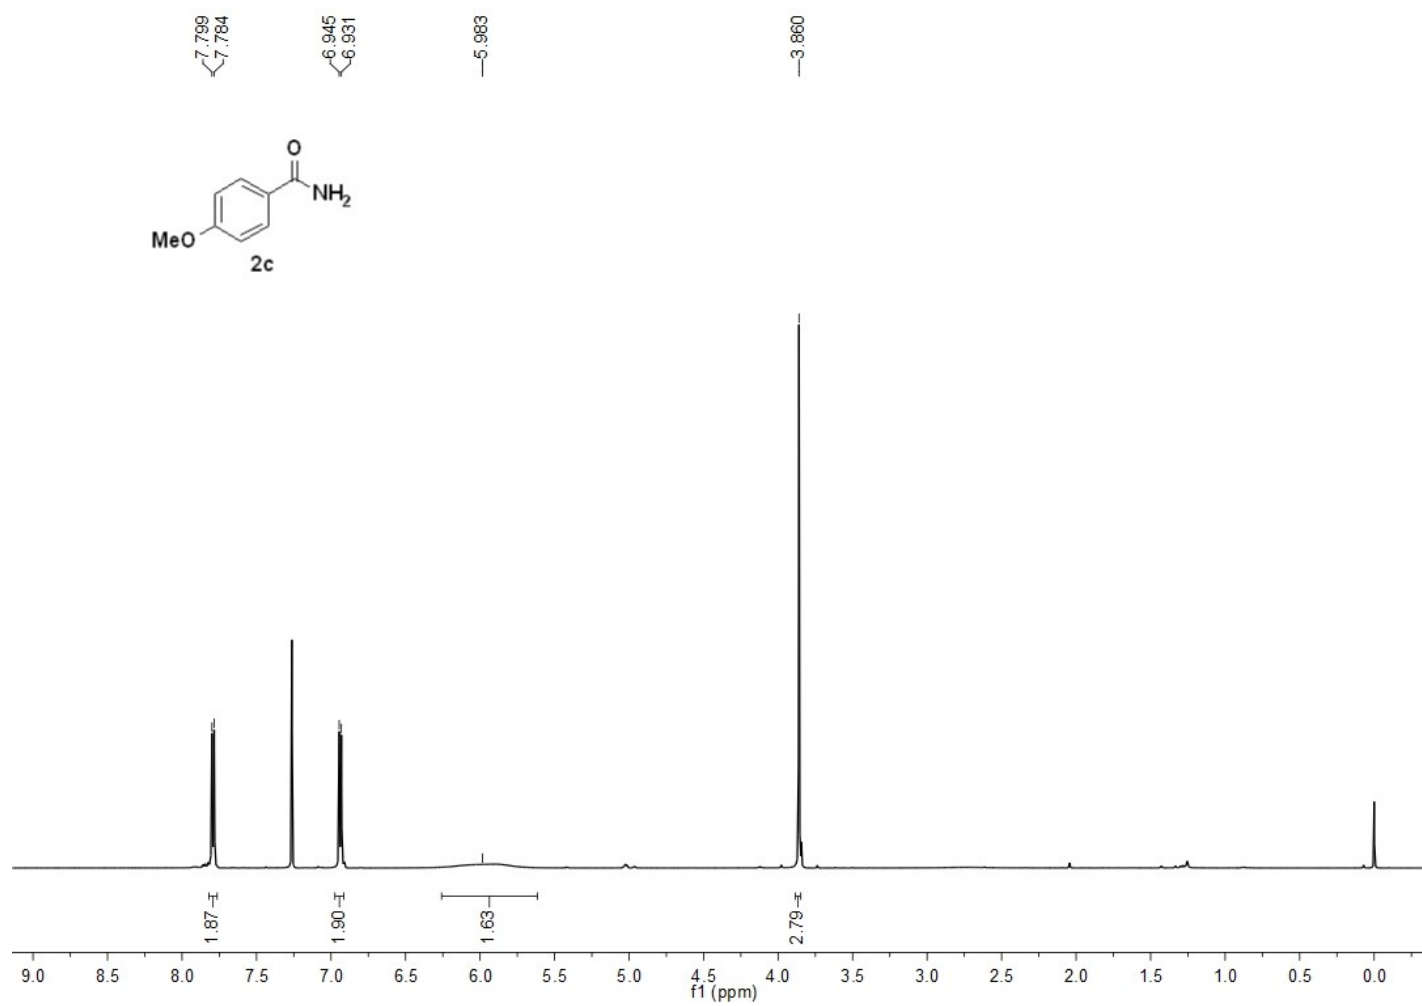

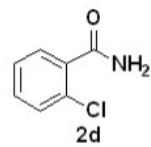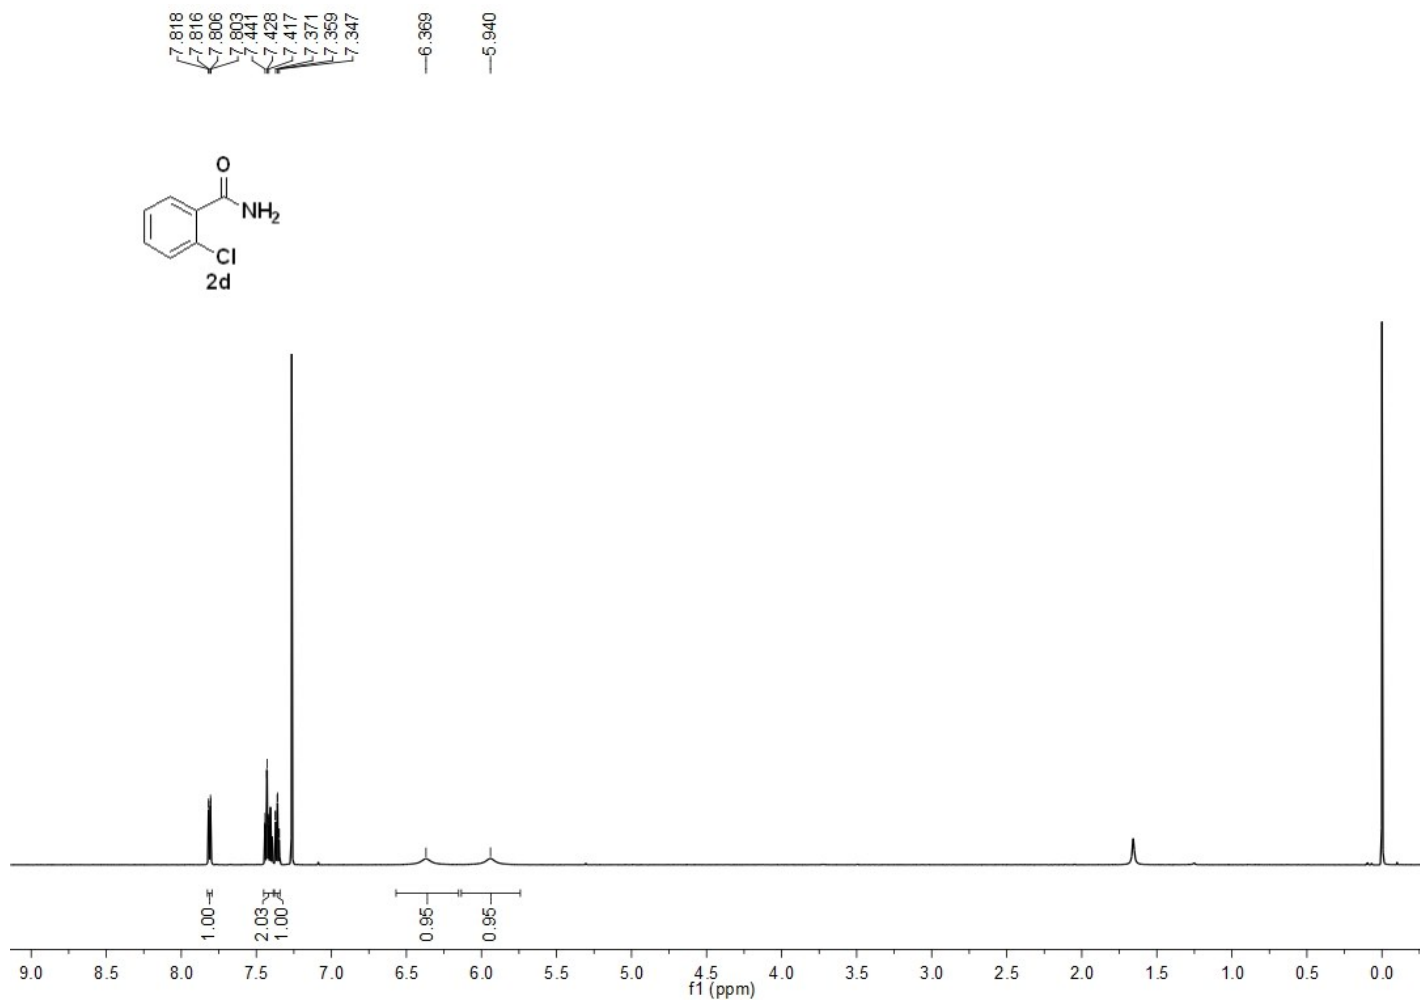



7.909  
7.896  
7.476  
7.416  
7.391  
7.143  
7.132  
7.130  
7.120  
7.117  
5.888  
5.848

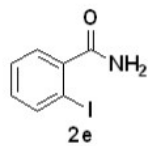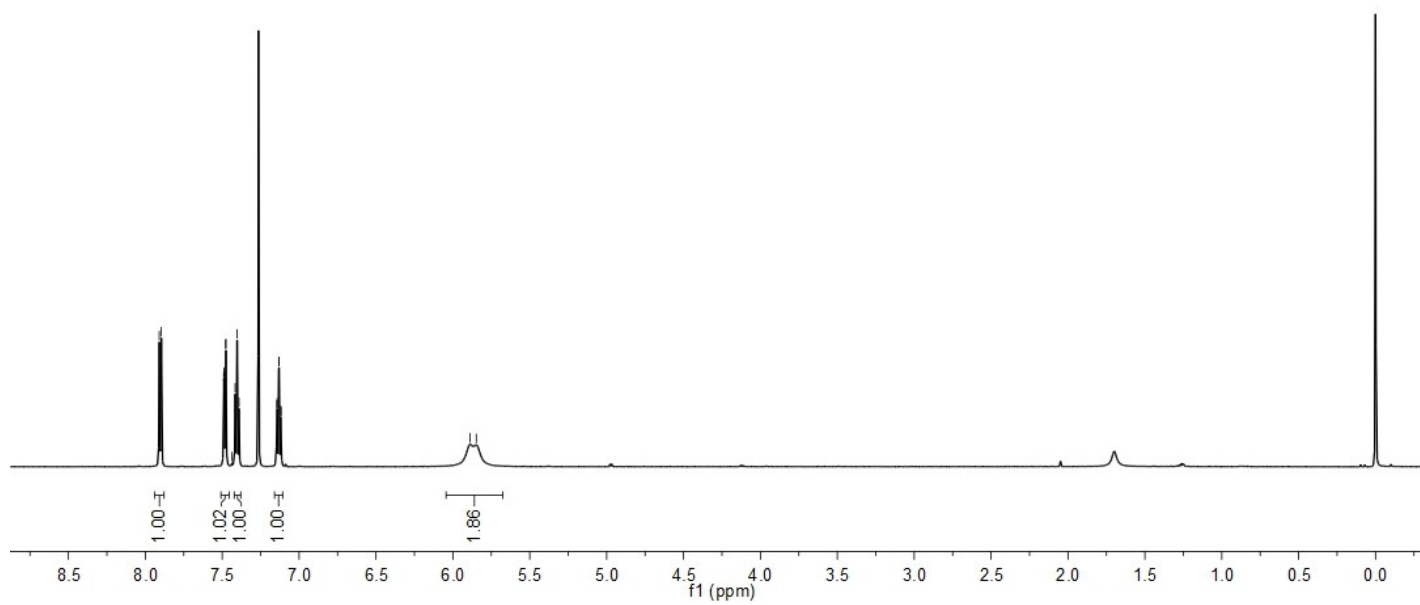

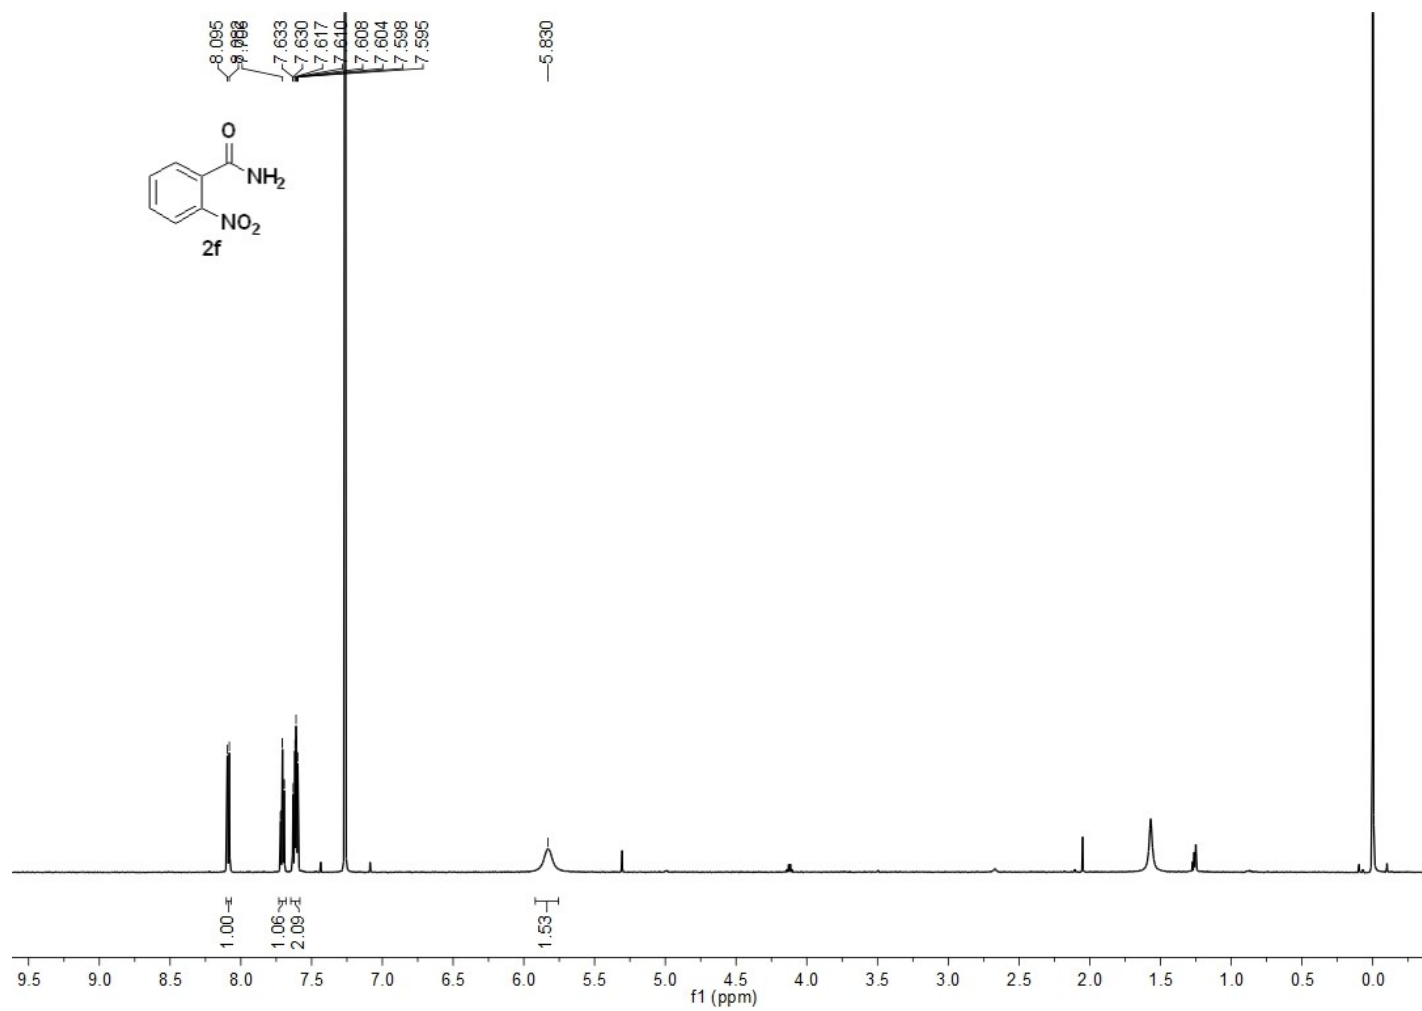

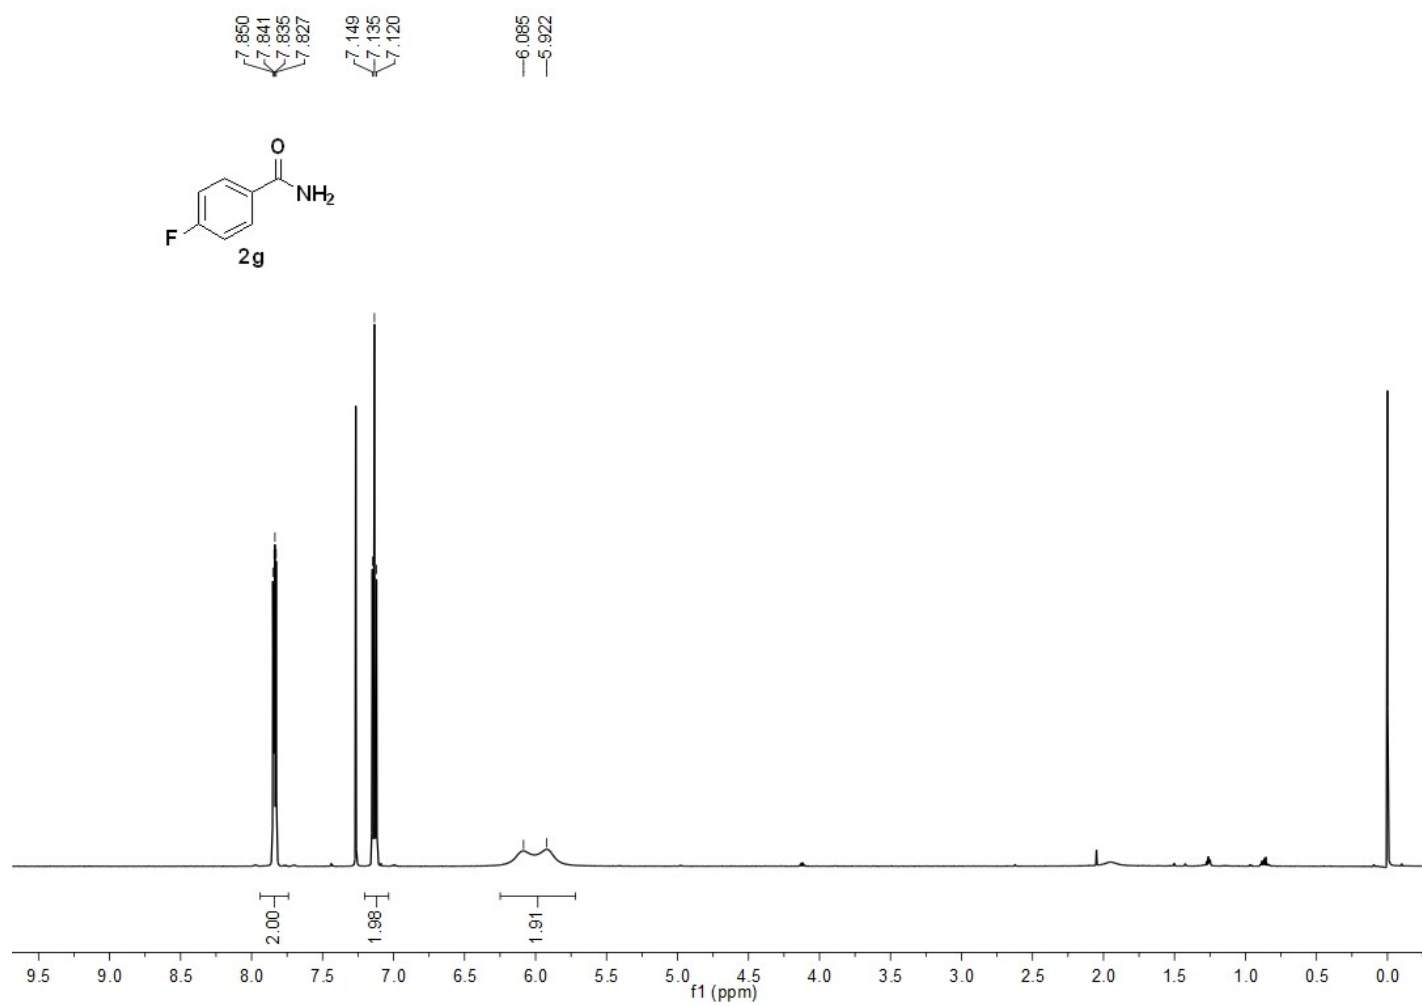

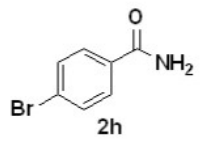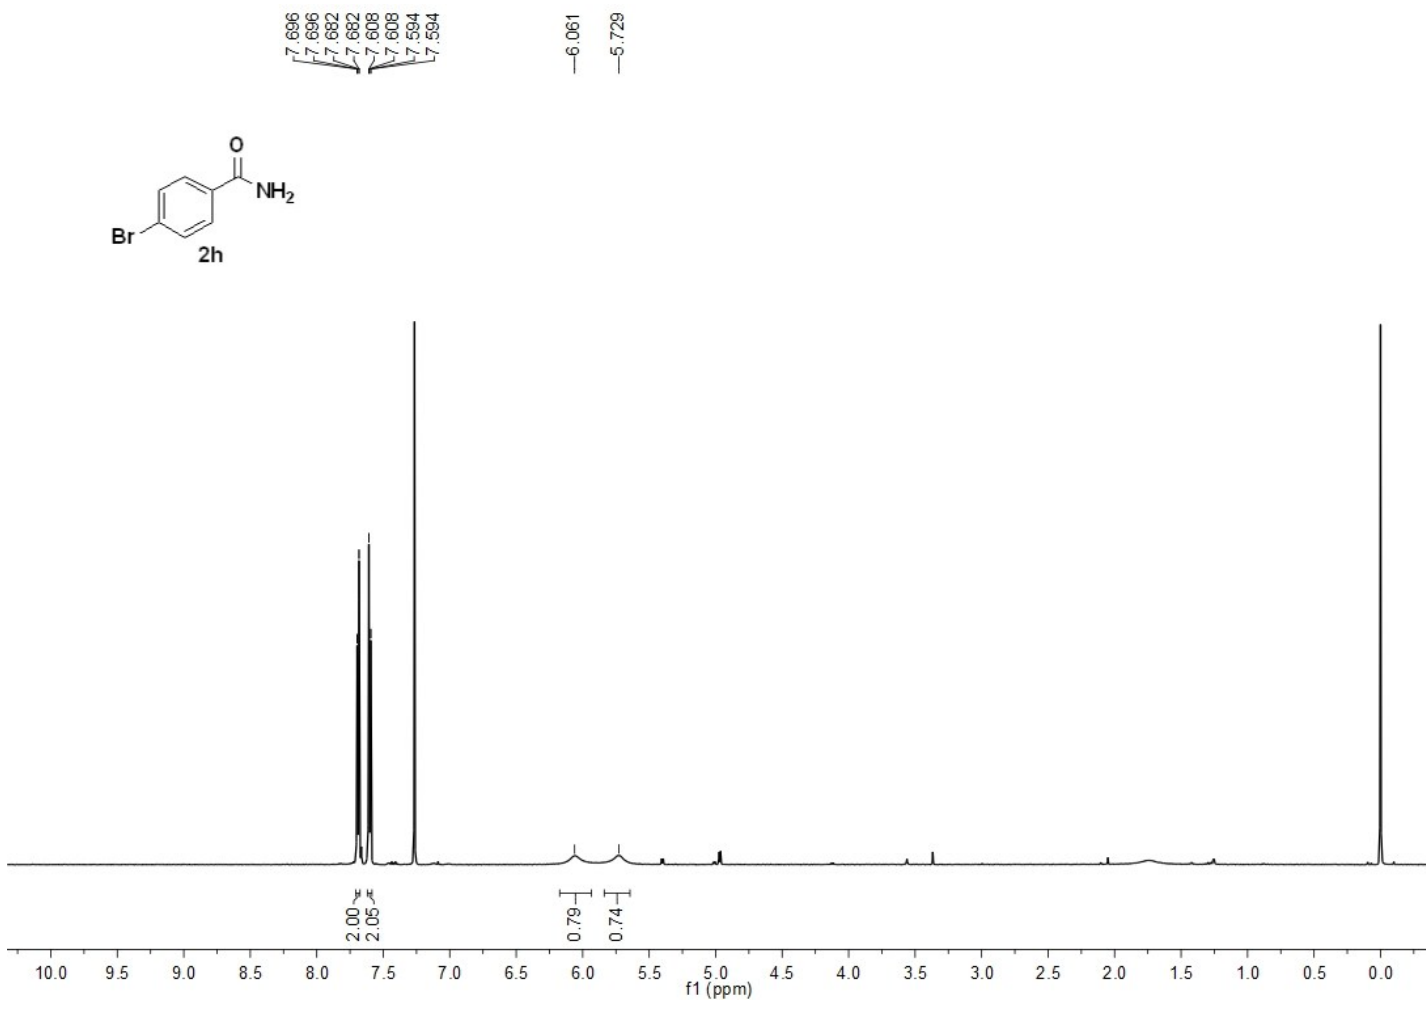

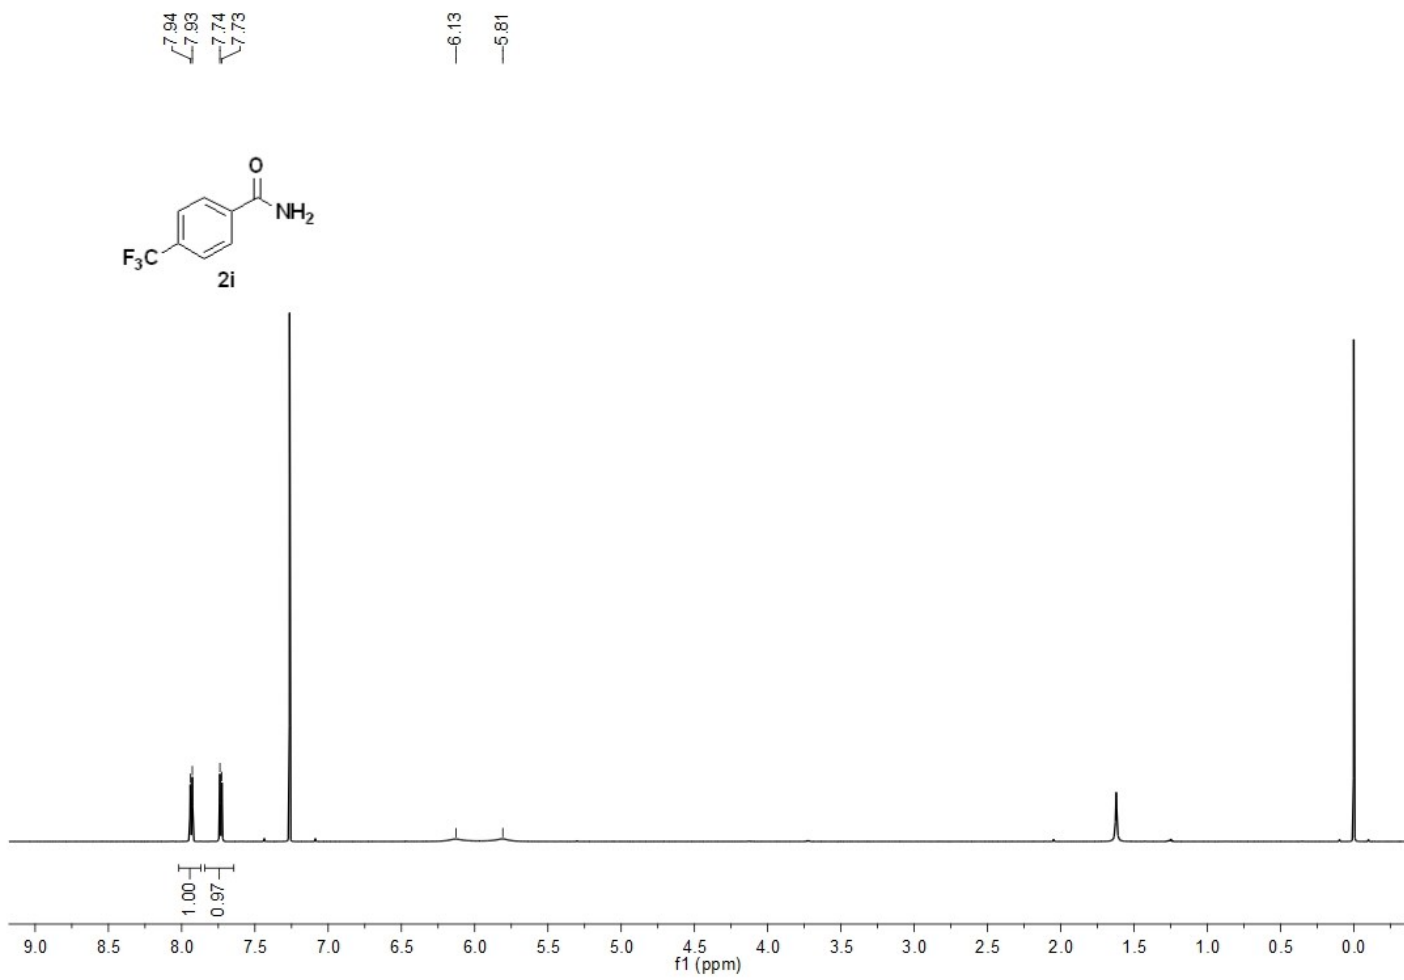

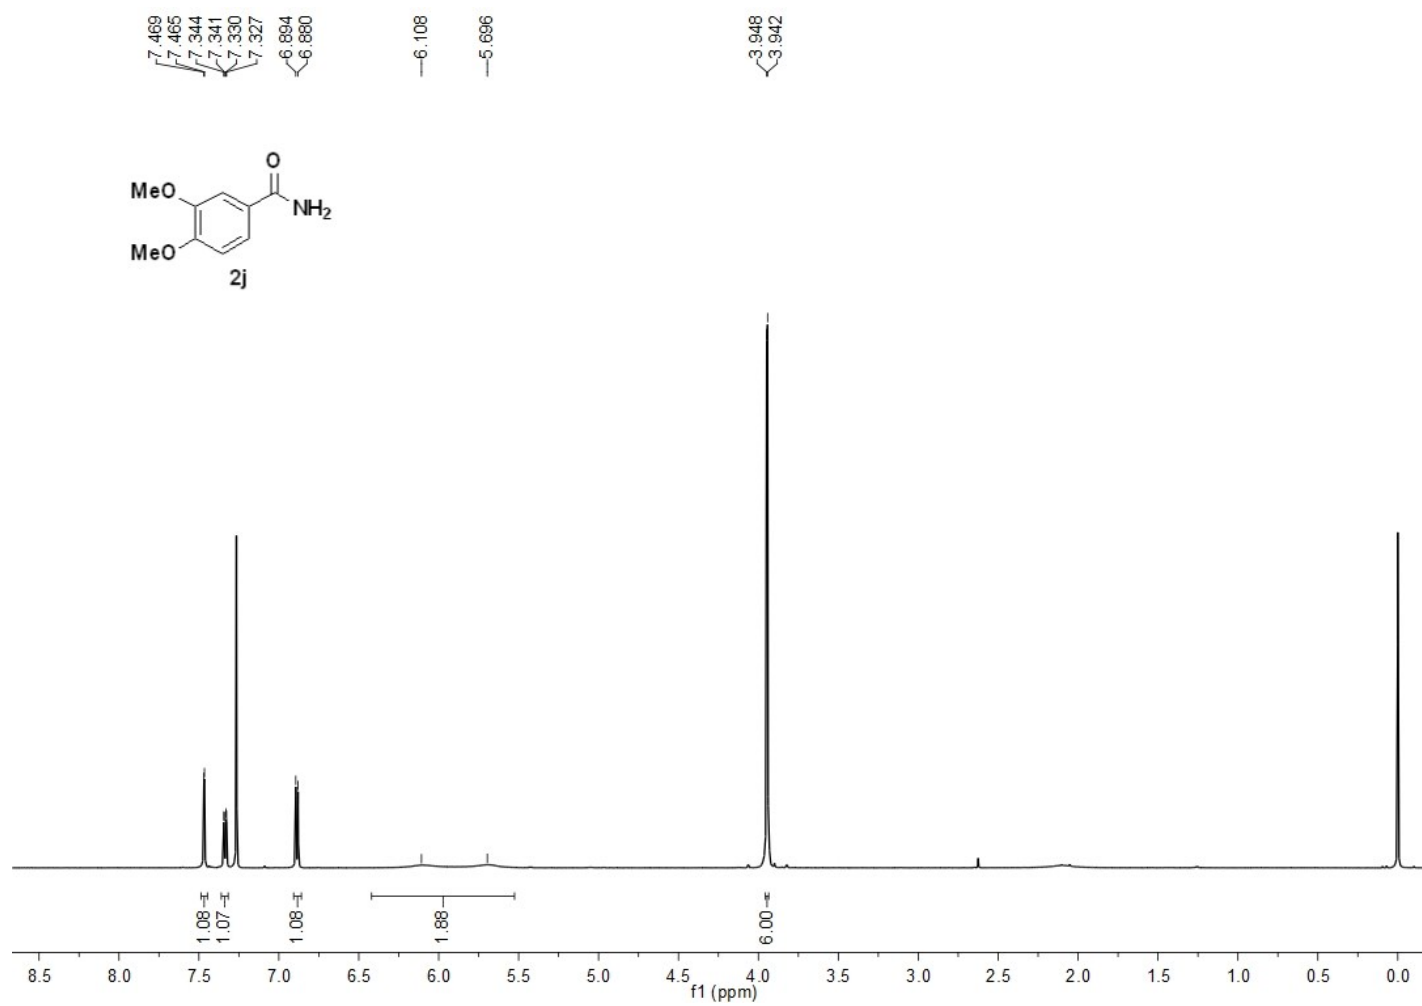

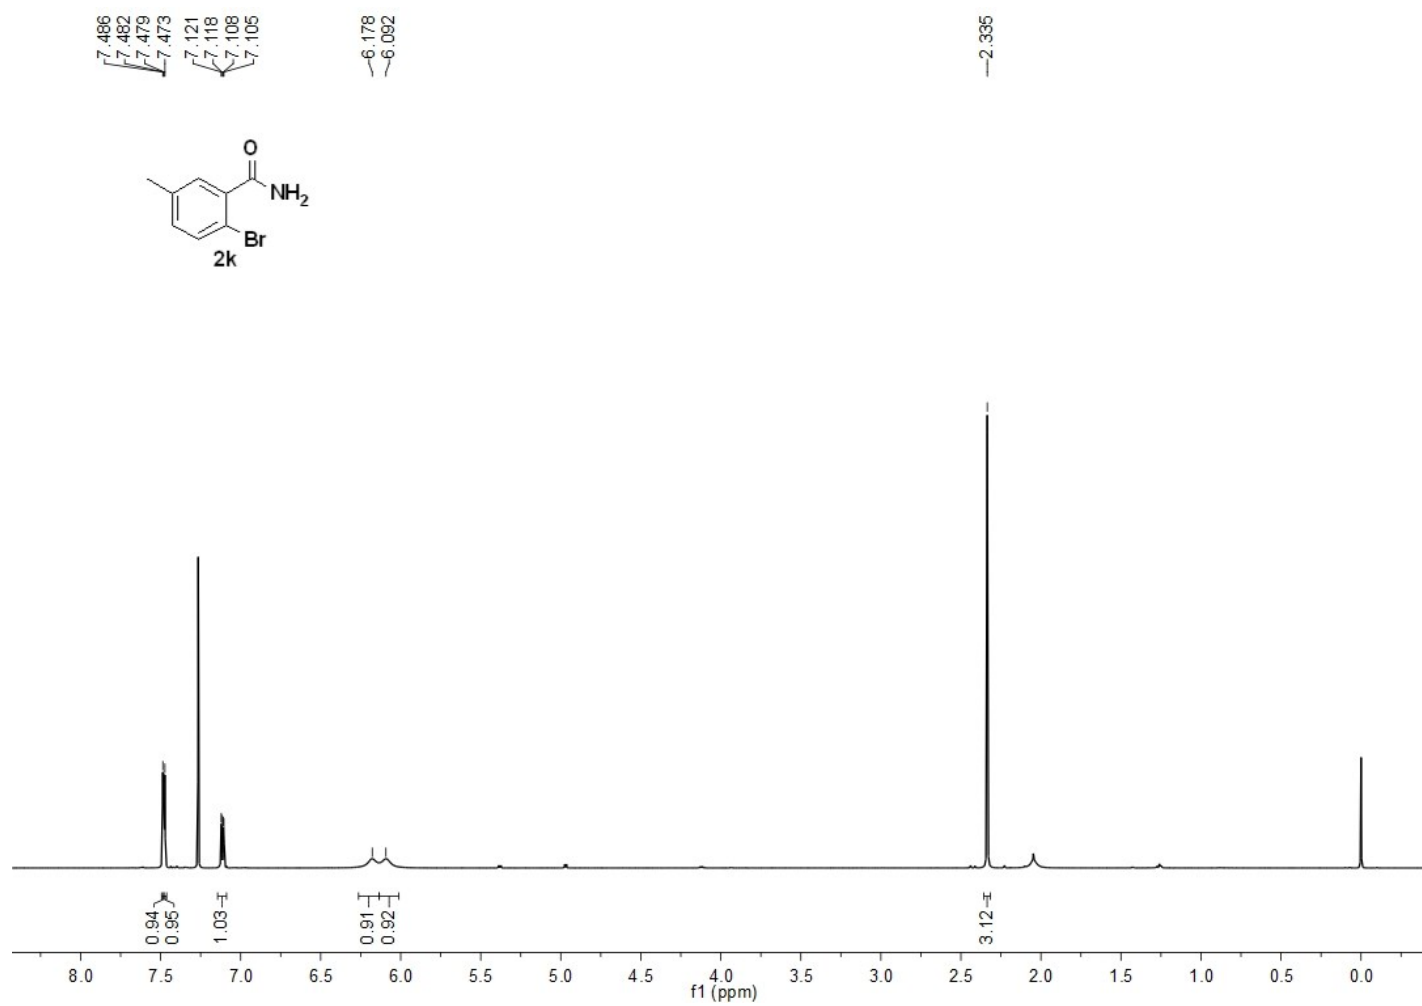

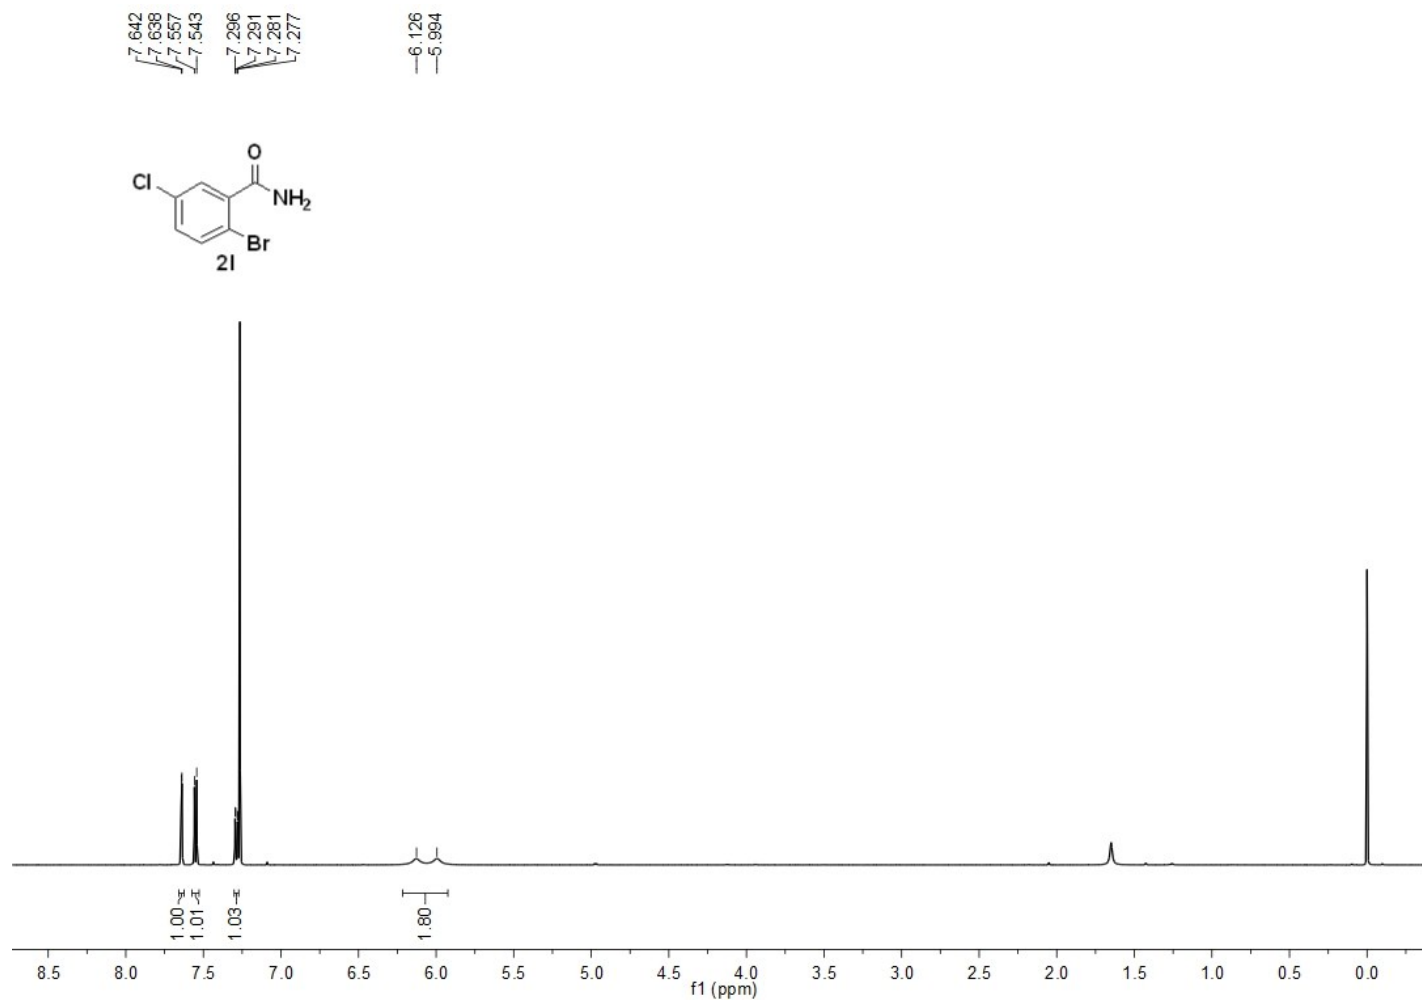



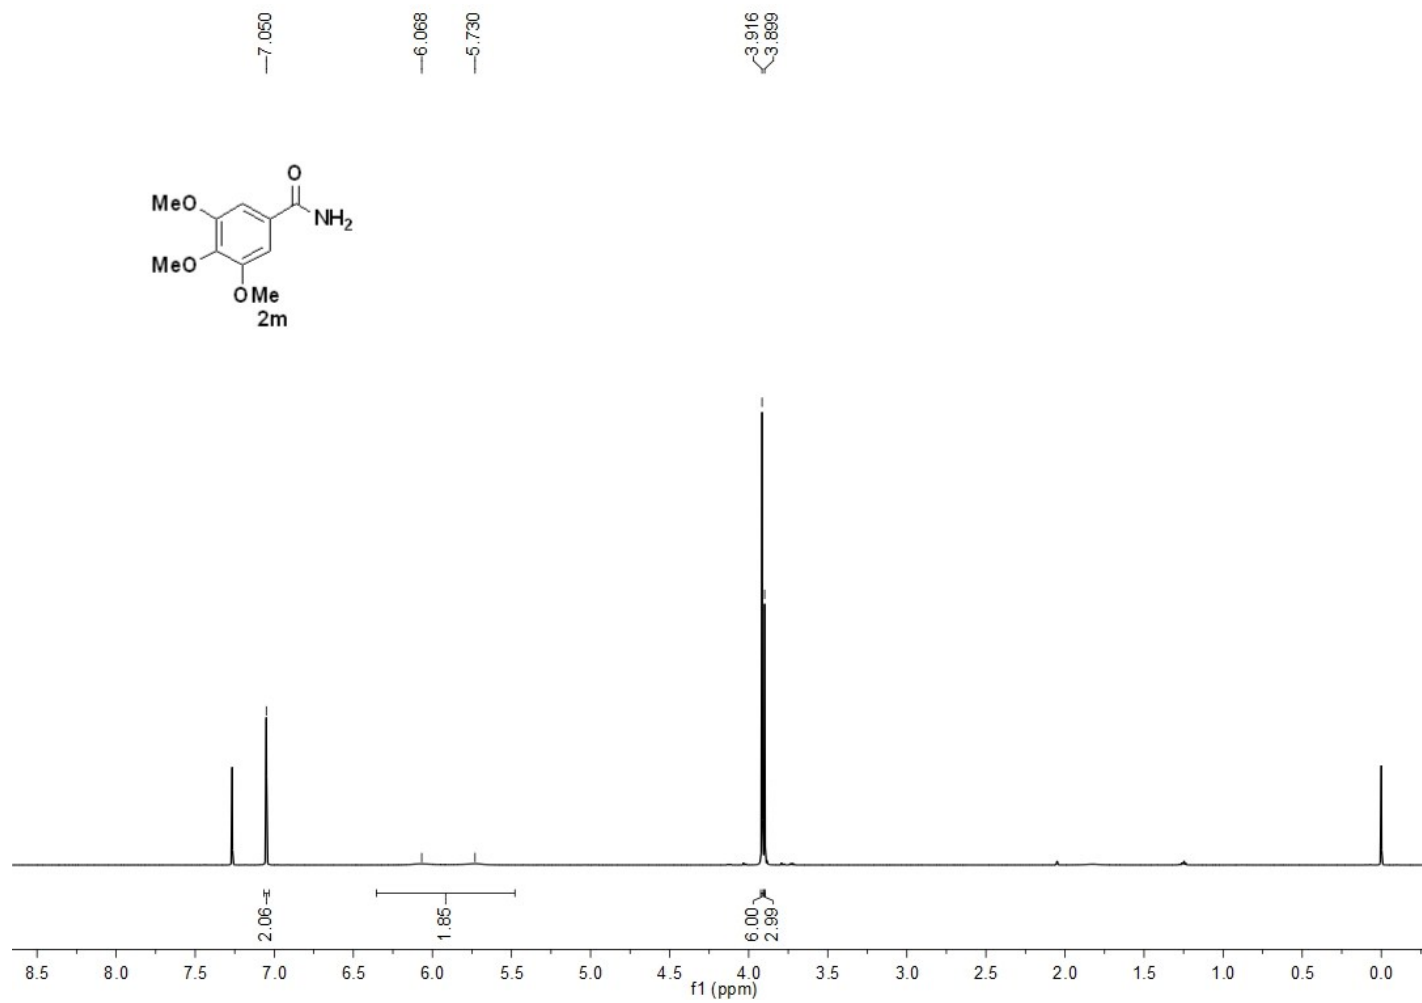

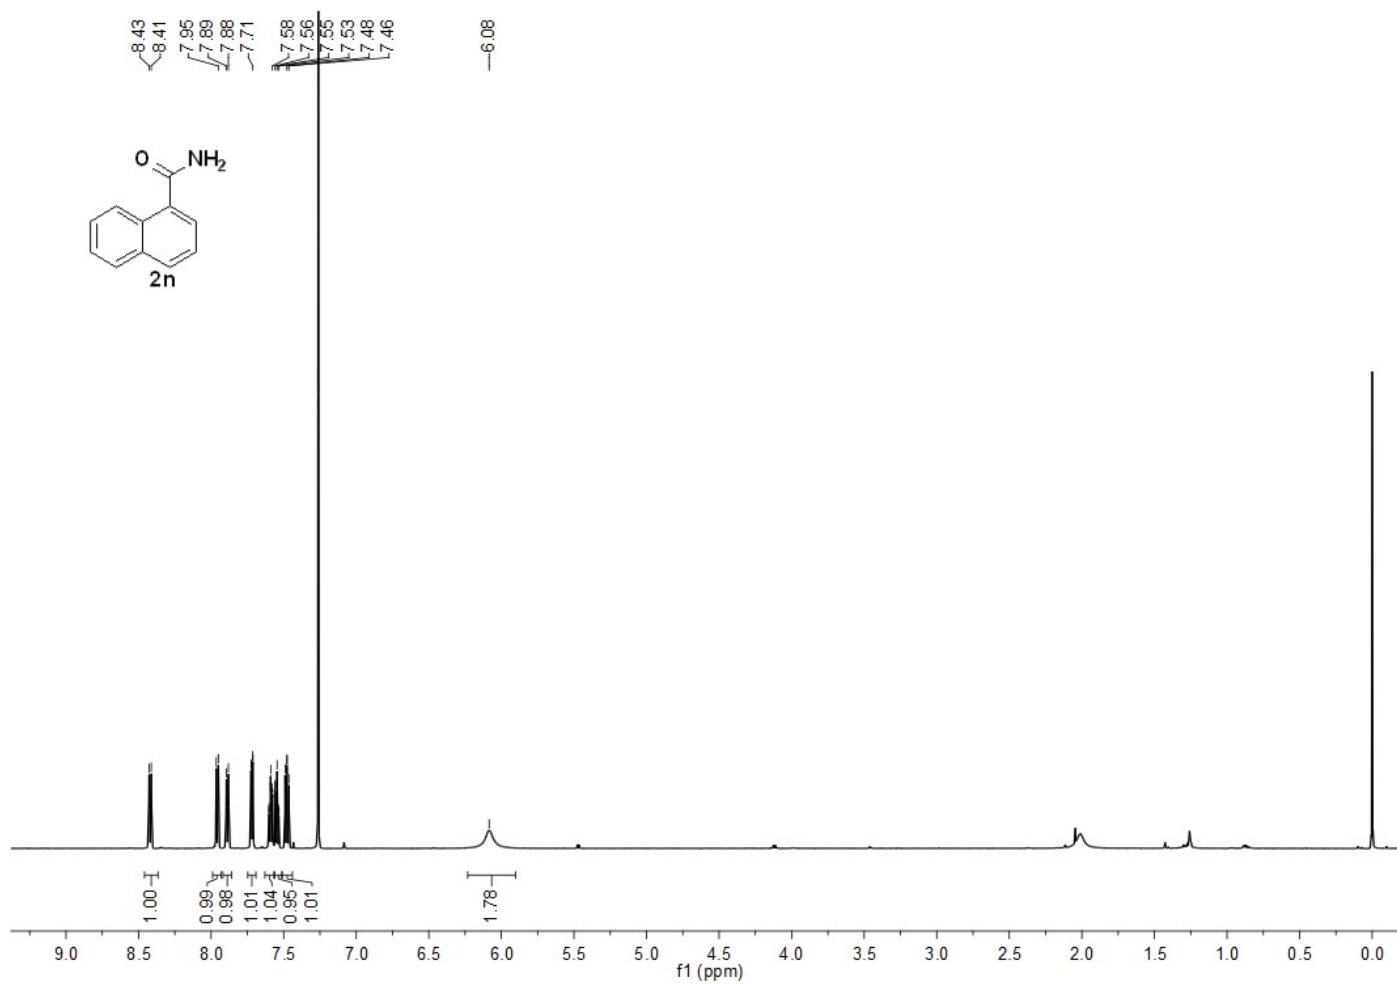

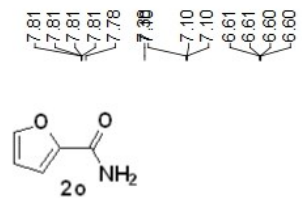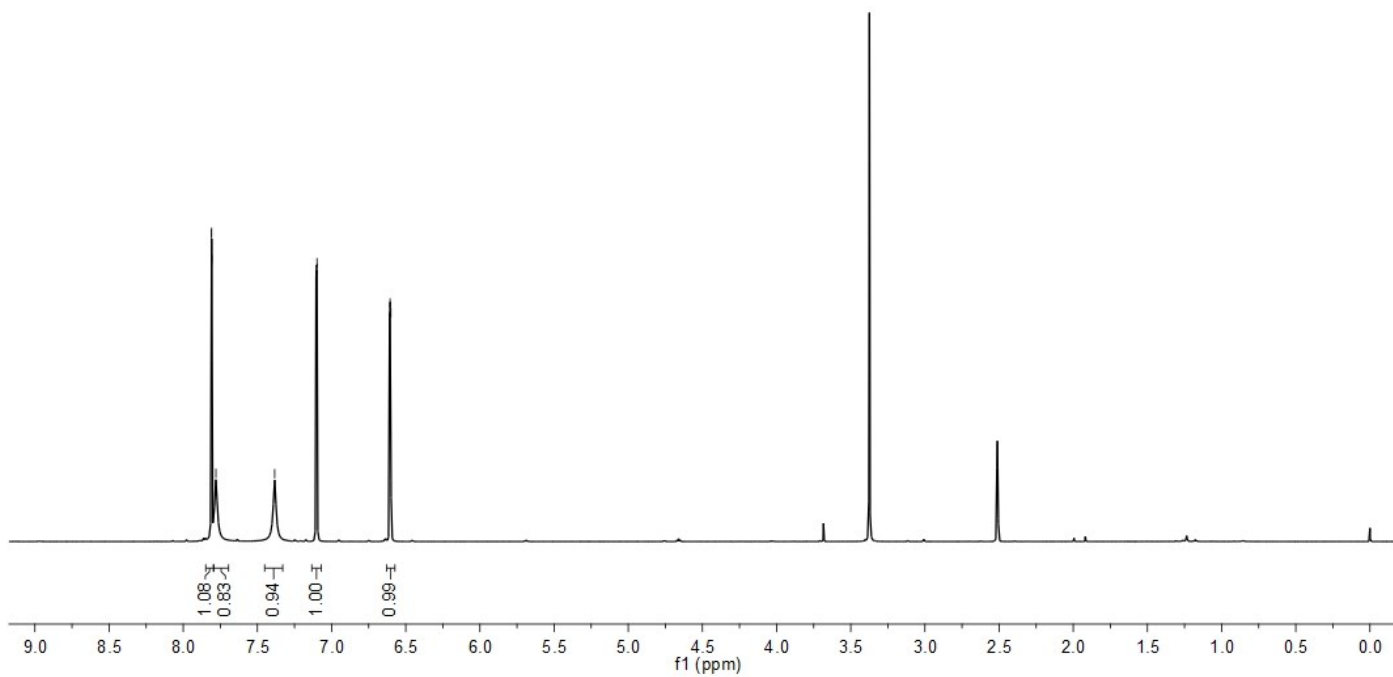

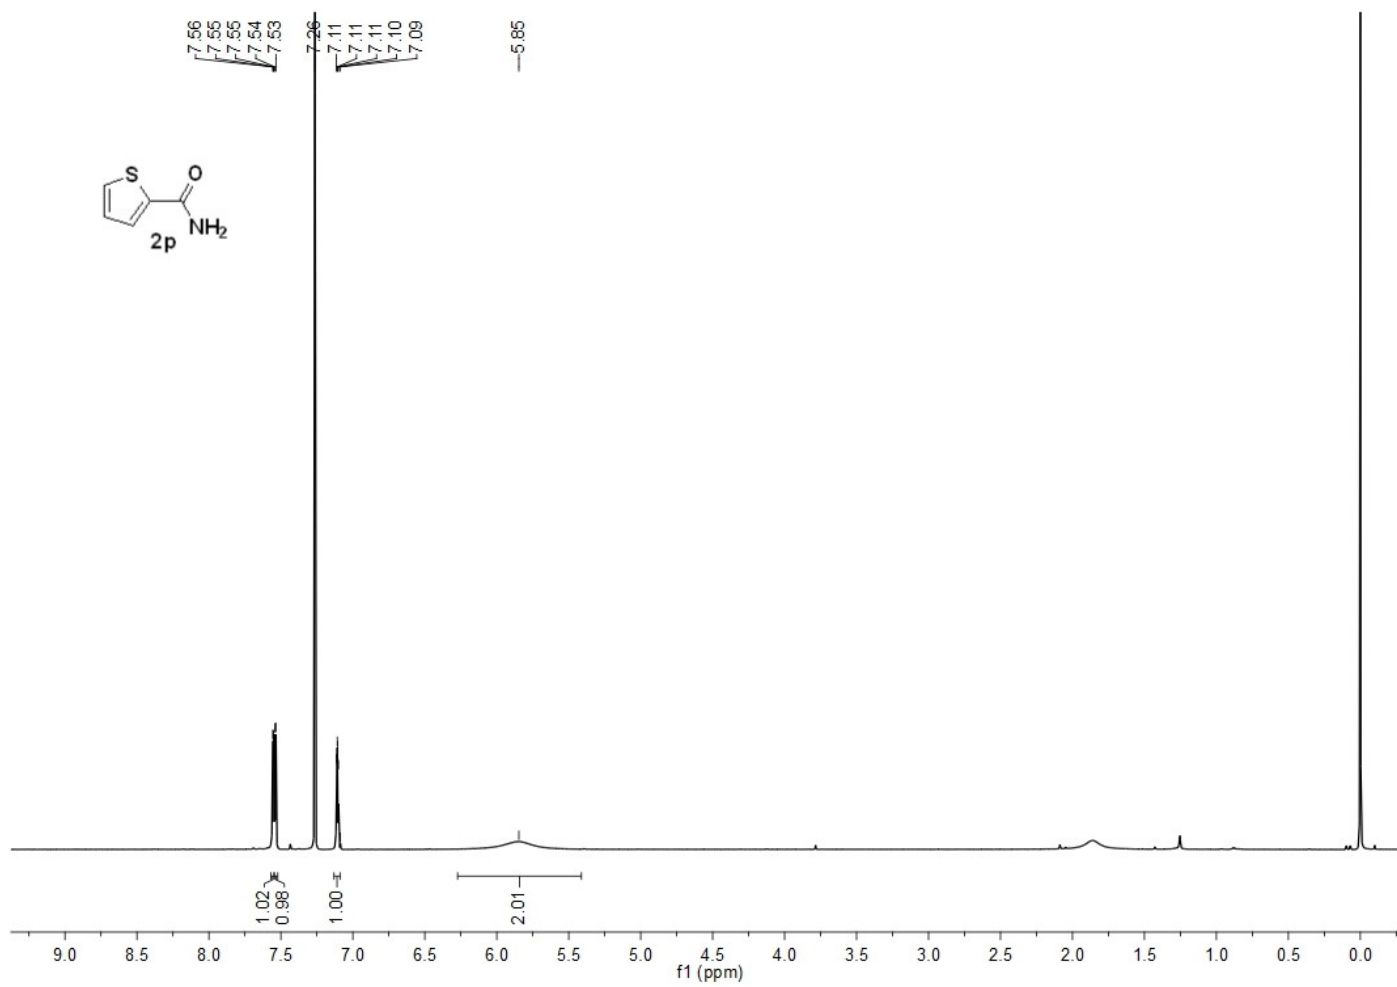

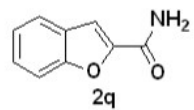

7.70  
7.68  
7.38  
7.43  
7.32  
7.31  
7.30  
-6.57  
-6.04

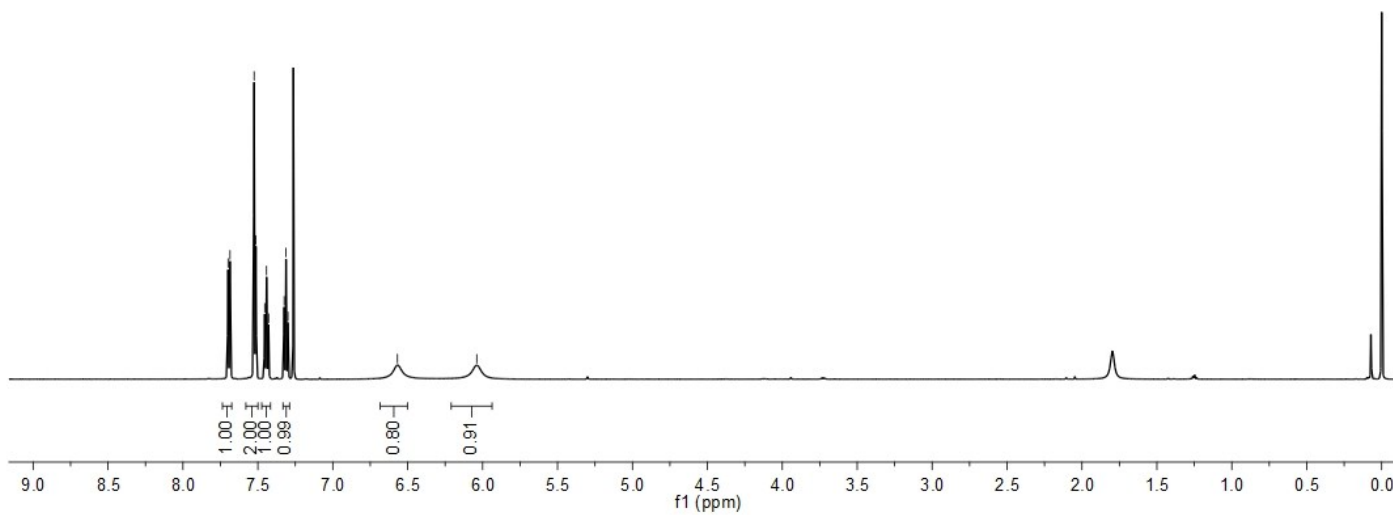

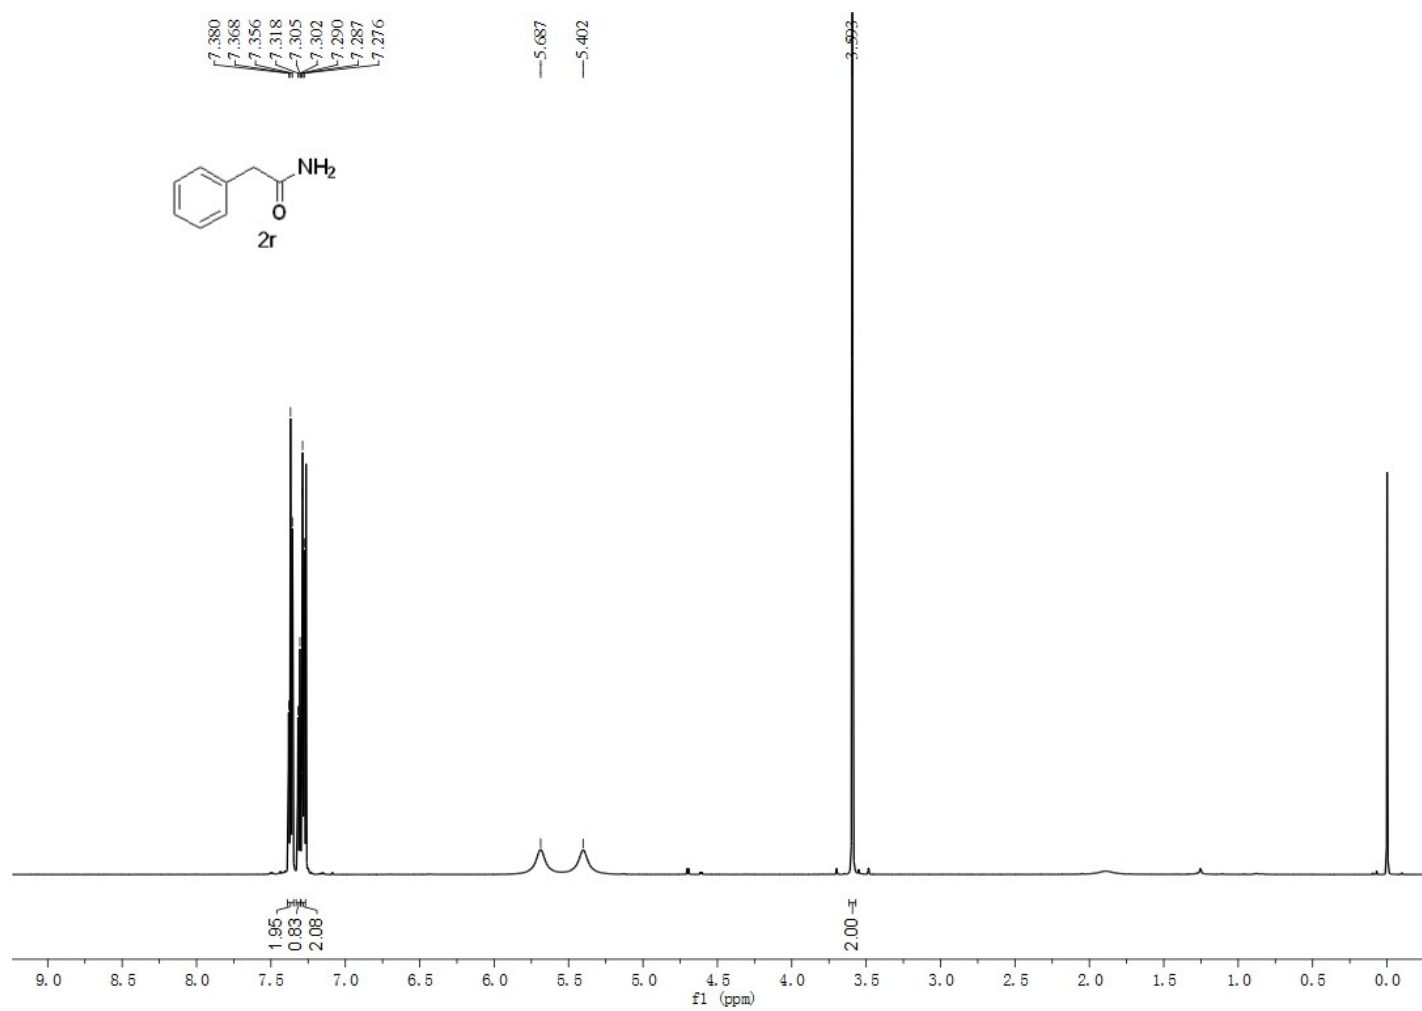

7.543  
7.542  
7.530  
7.528  
7.228  
7.101  
7.098  
7.088  
7.085  
7.075  
7.072

5.546  
5.431

3.104  
3.091  
3.077

2.562  
2.549  
2.536

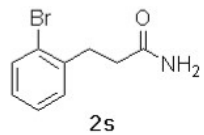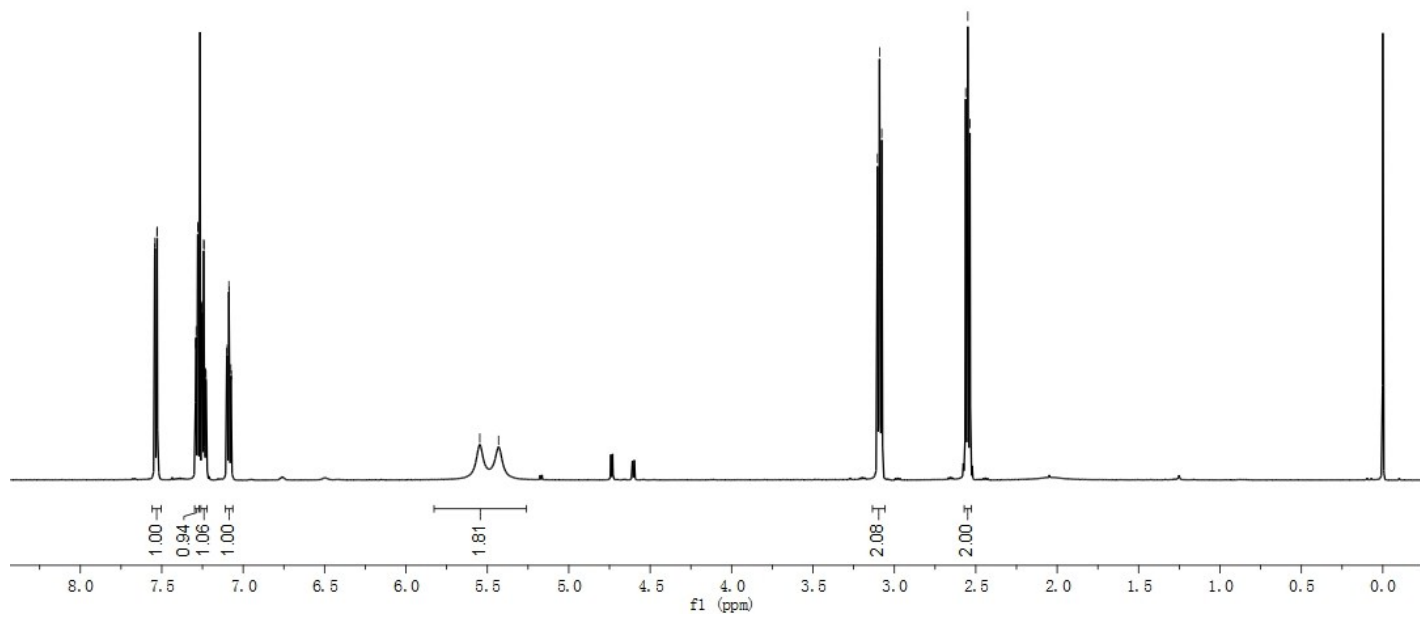

7.678  
7.652  
7.533  
7.526  
7.520  
7.517  
7.391  
7.388  
7.383  
7.379  
6.485  
6.458  
5.692

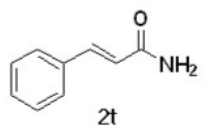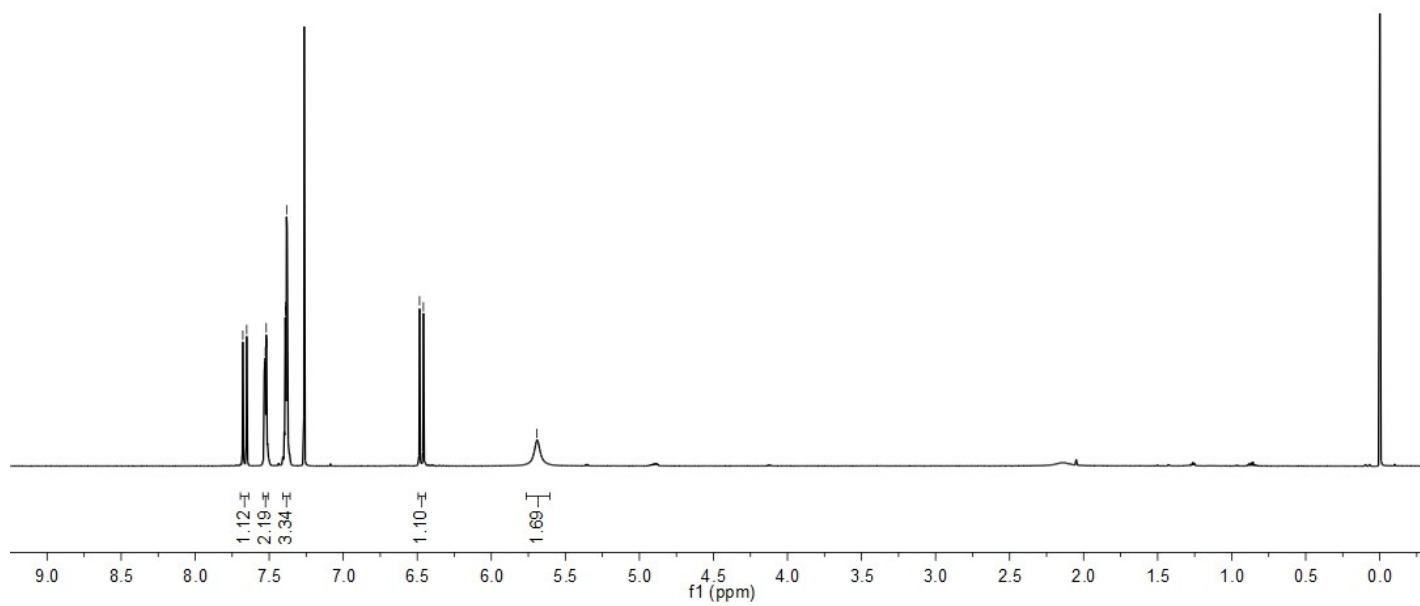



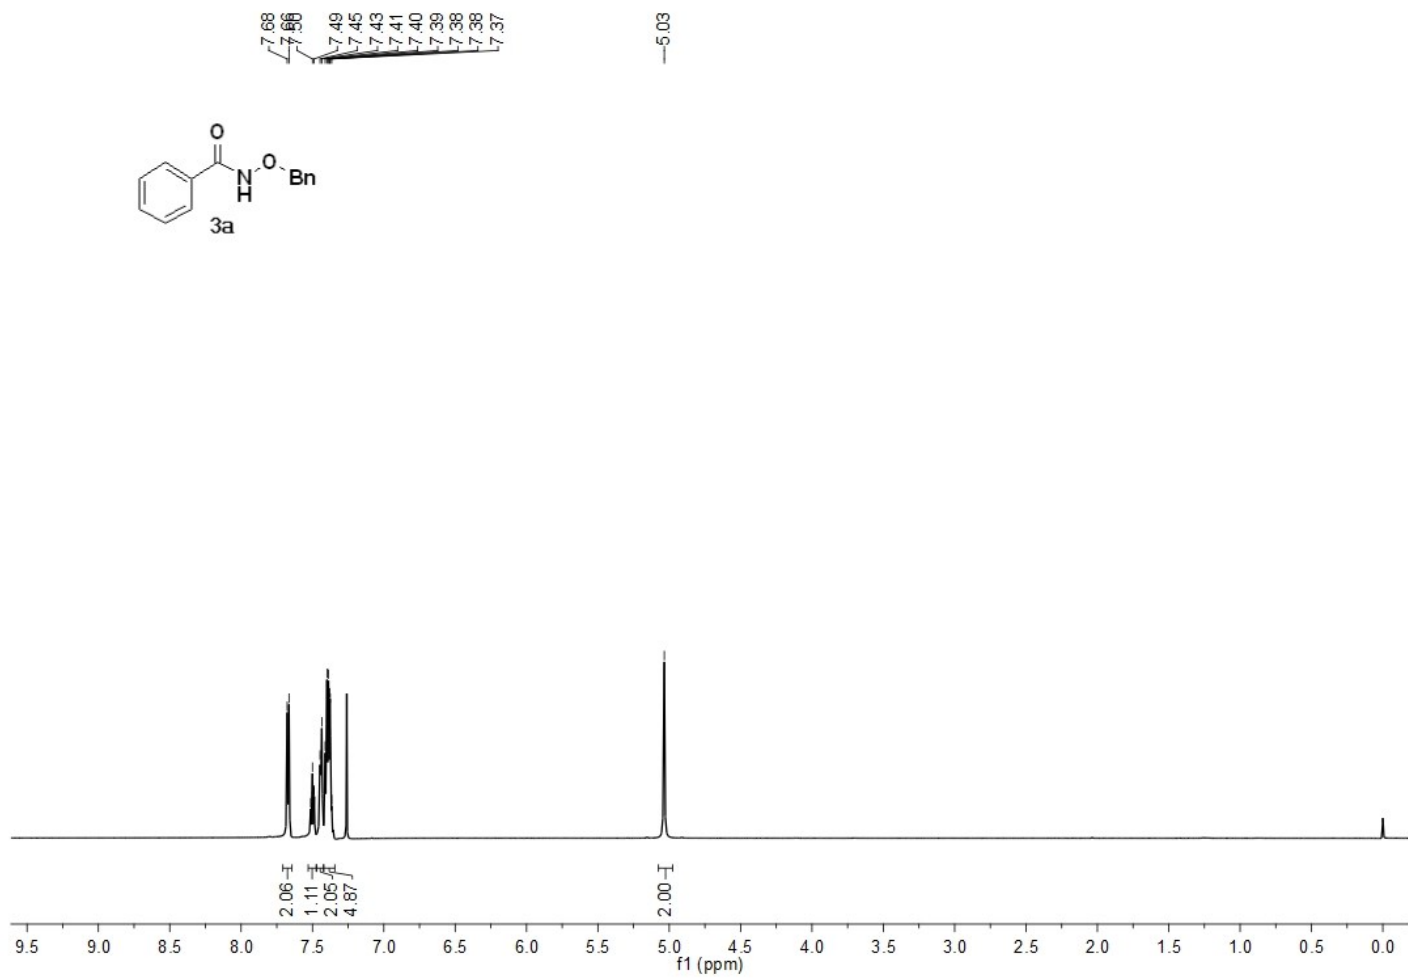

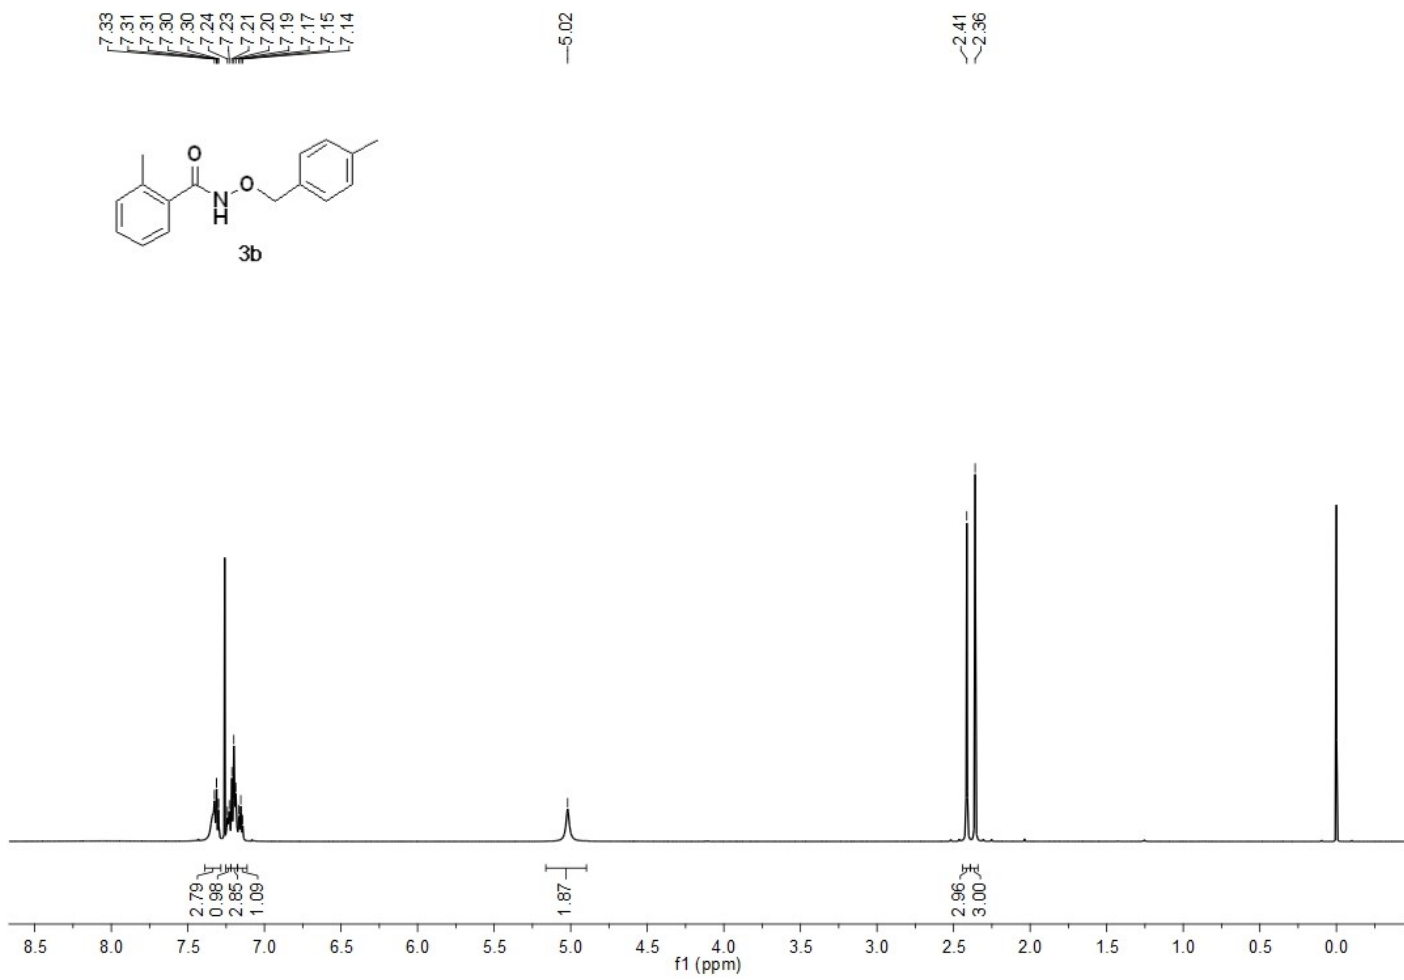

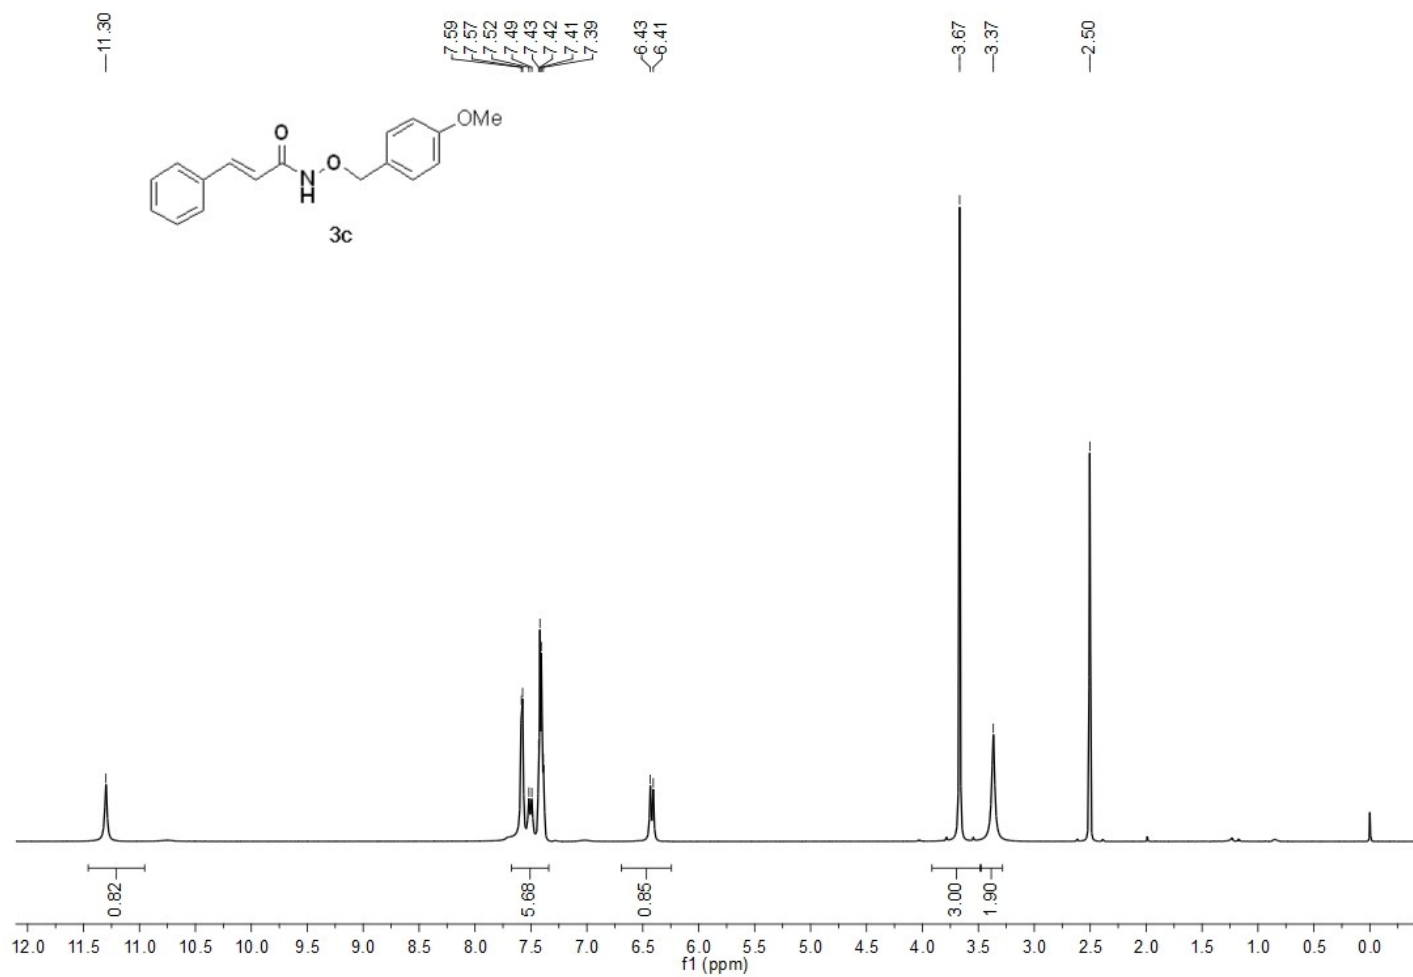

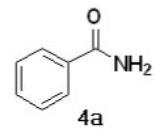

7.832  
7.831  
7.819  
7.817  
7.543  
7.532  
7.530  
7.473  
7.460  
7.447  
-6.177  
-5.994

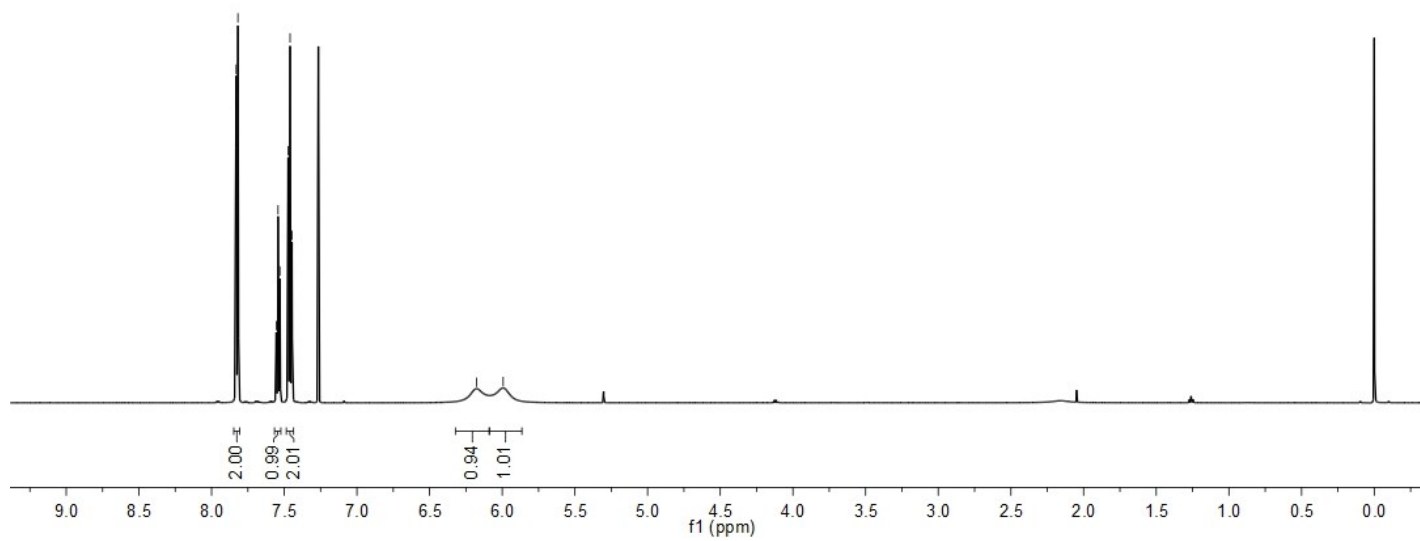

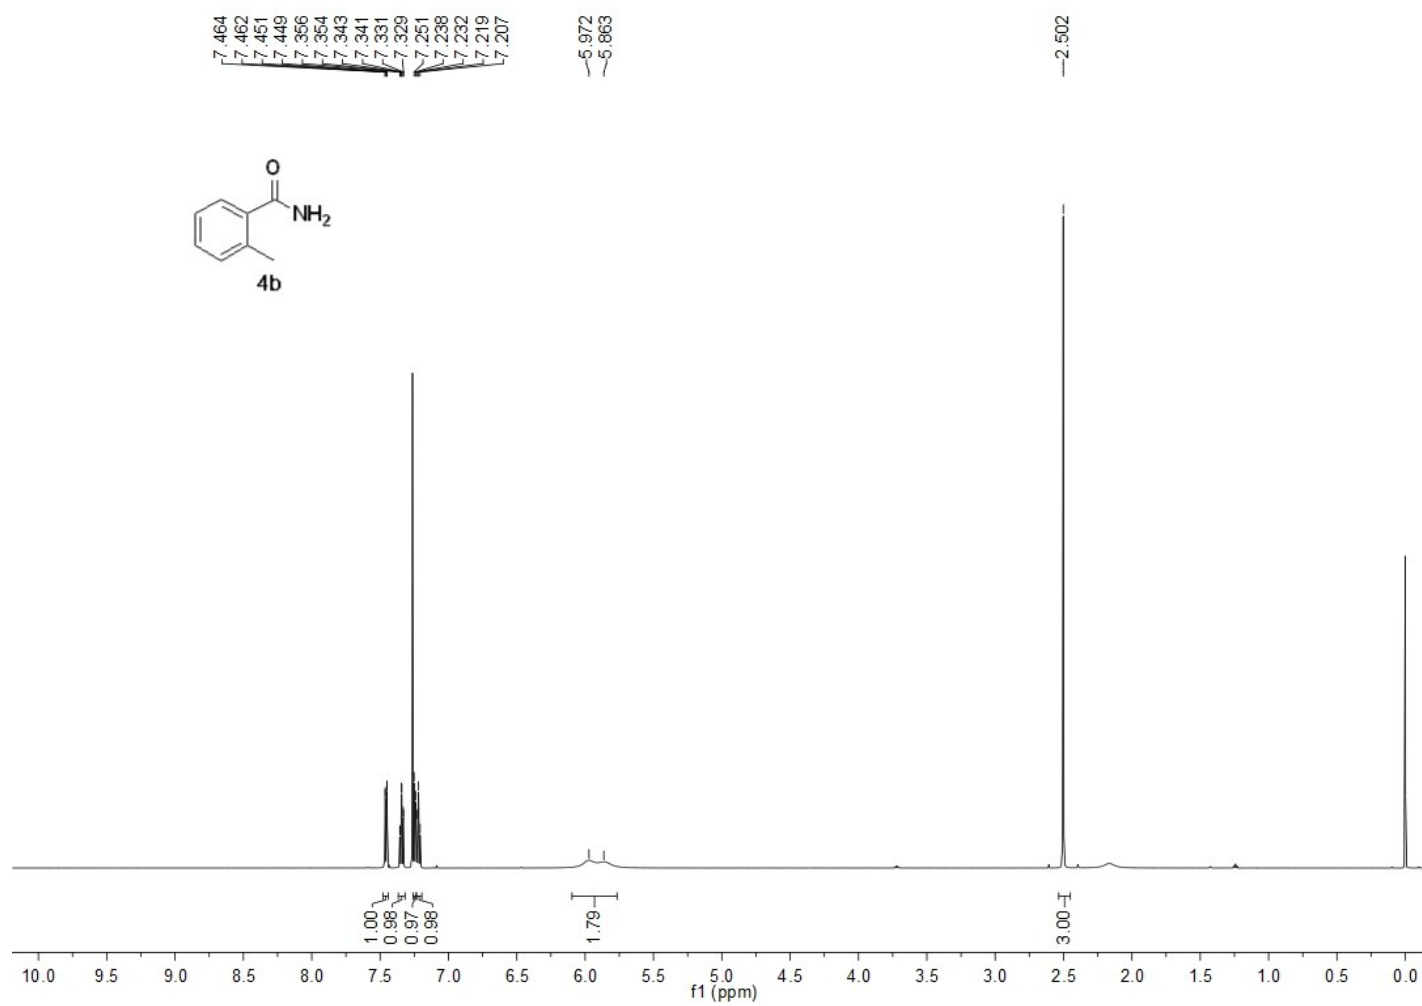

7.678  
7.652  
7.533  
7.526  
7.520  
7.517  
7.391  
7.388  
7.383  
7.379

6.485  
6.458

5.692

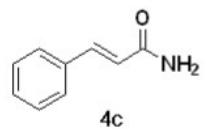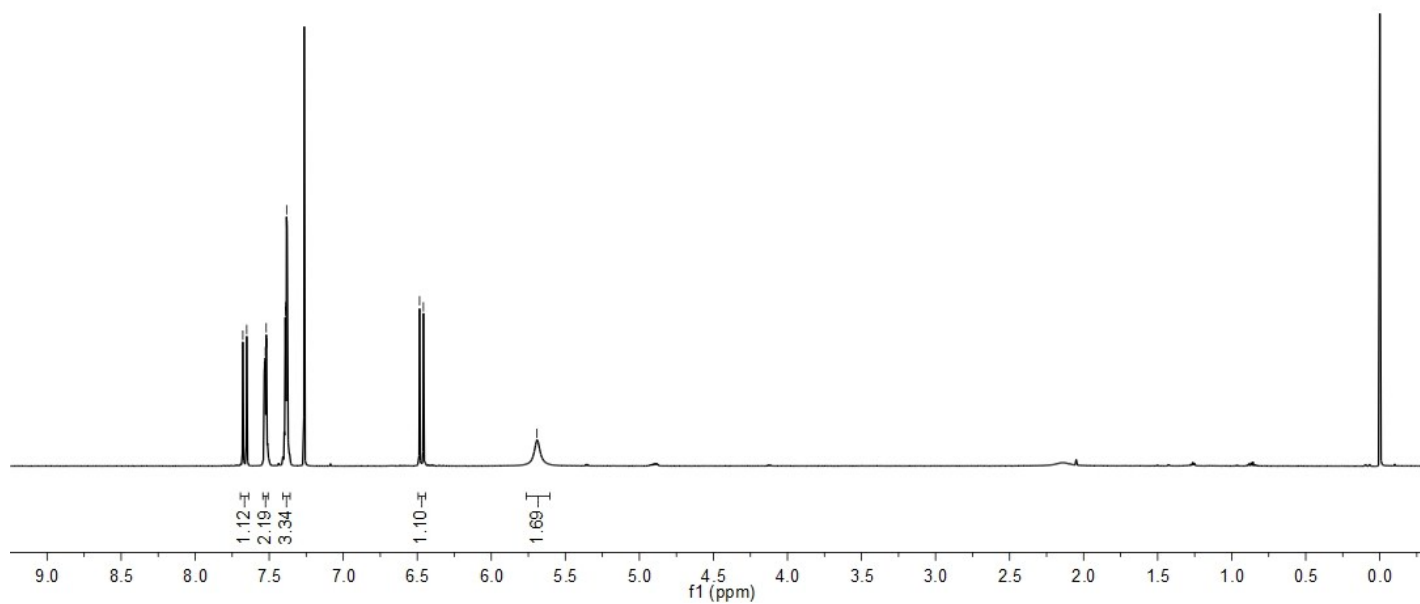

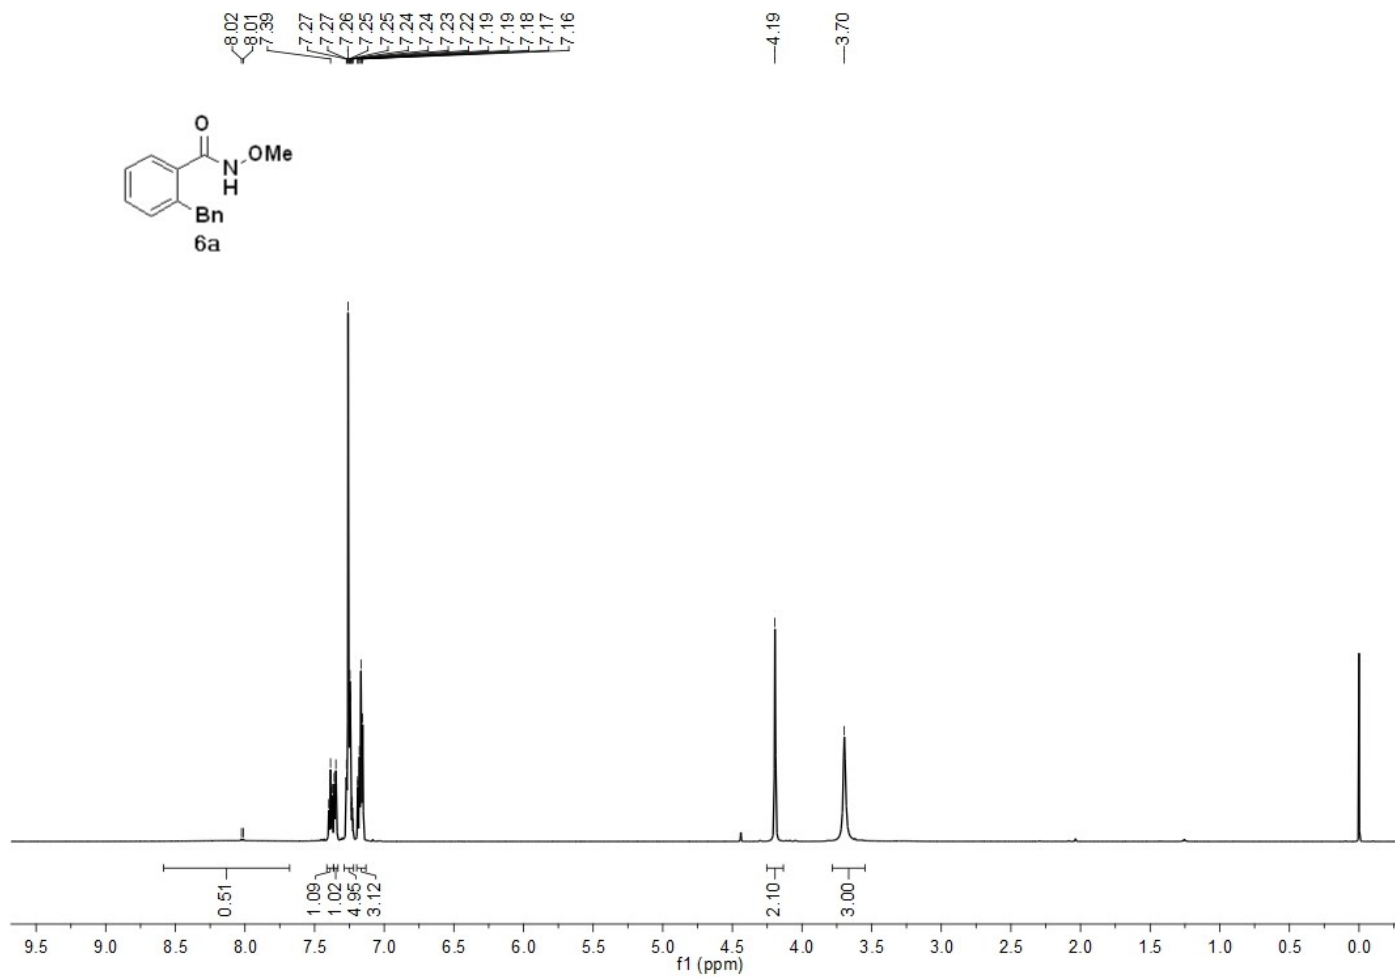

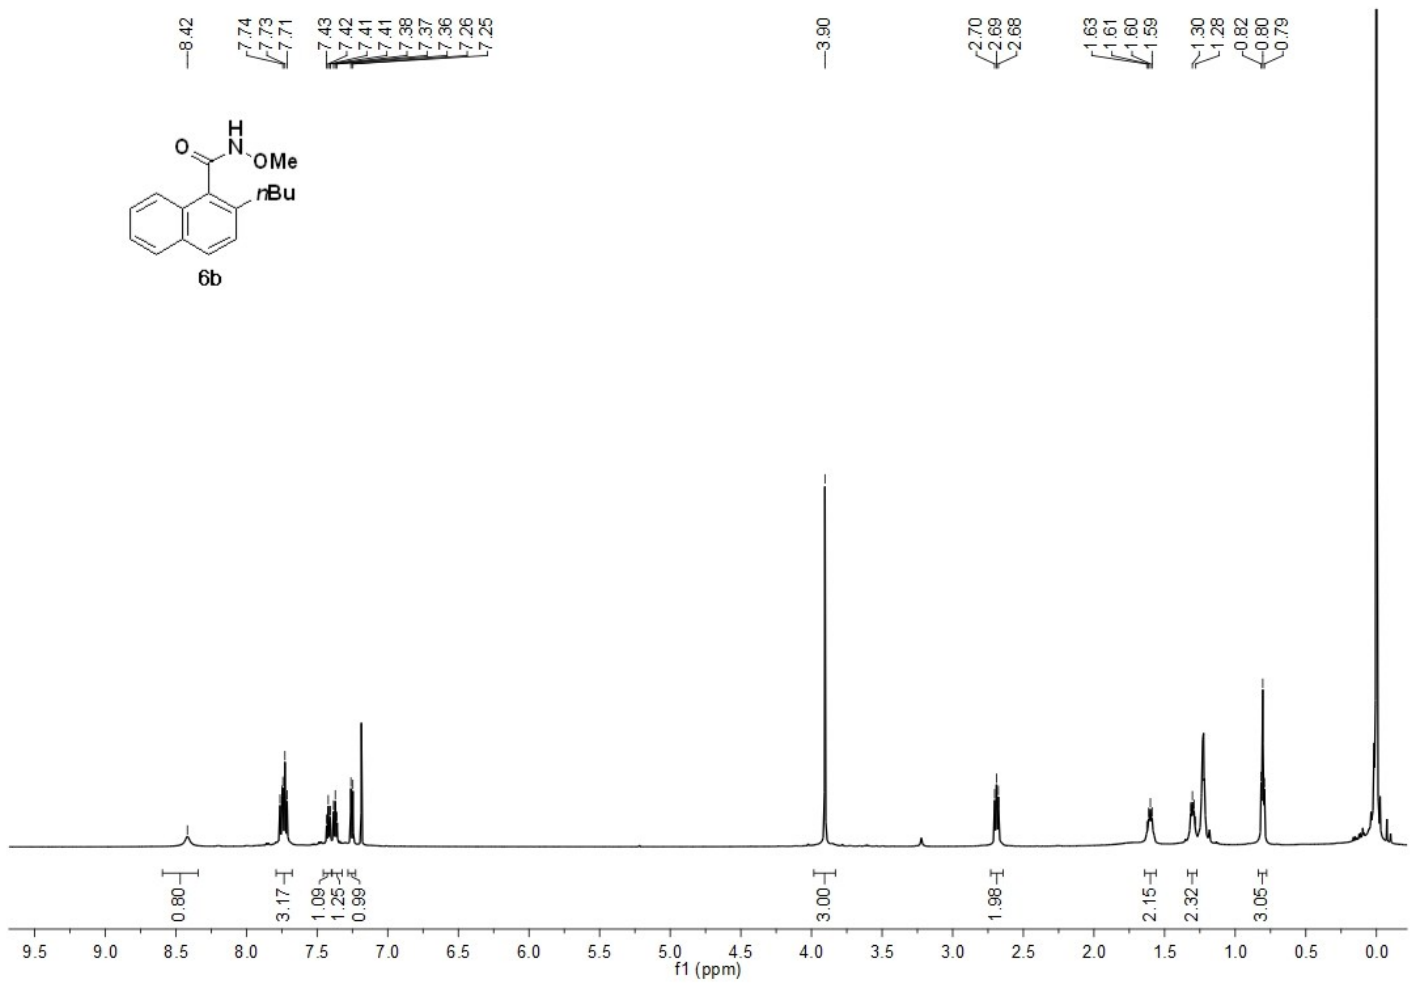



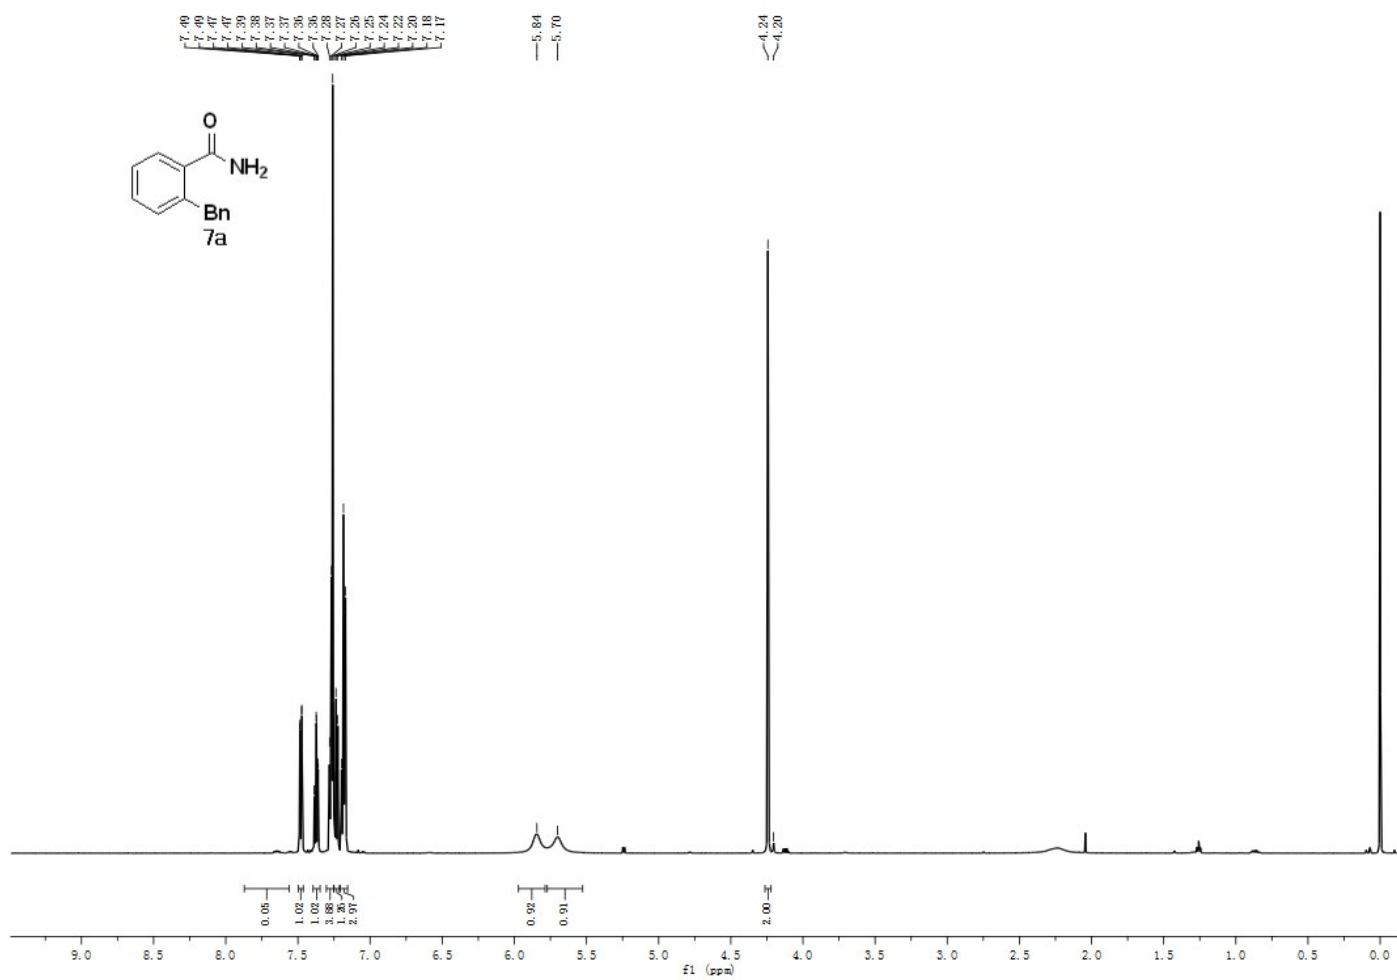

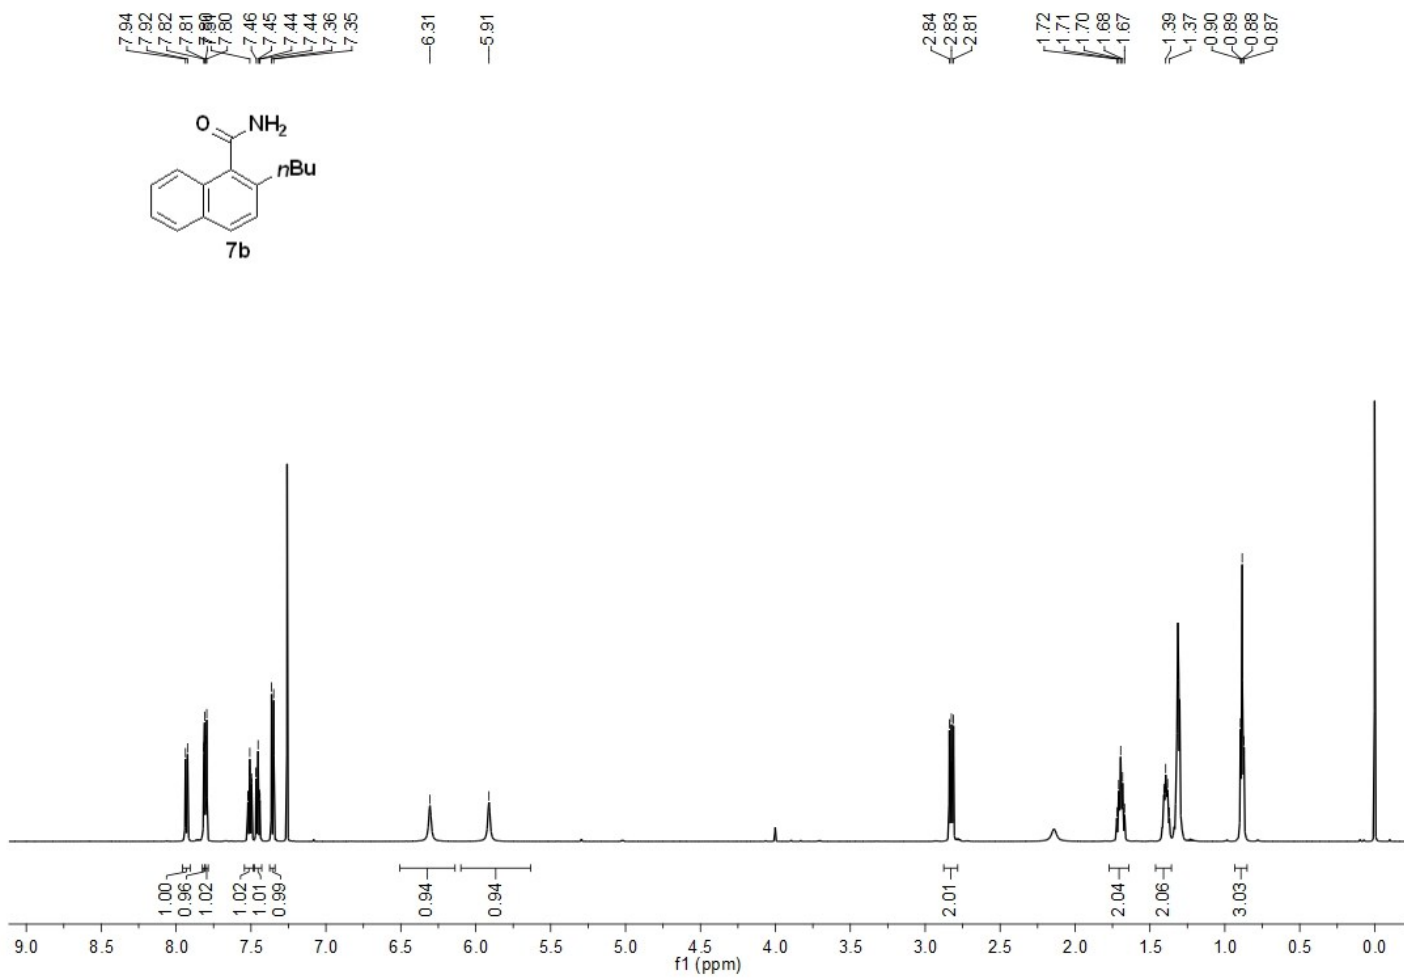

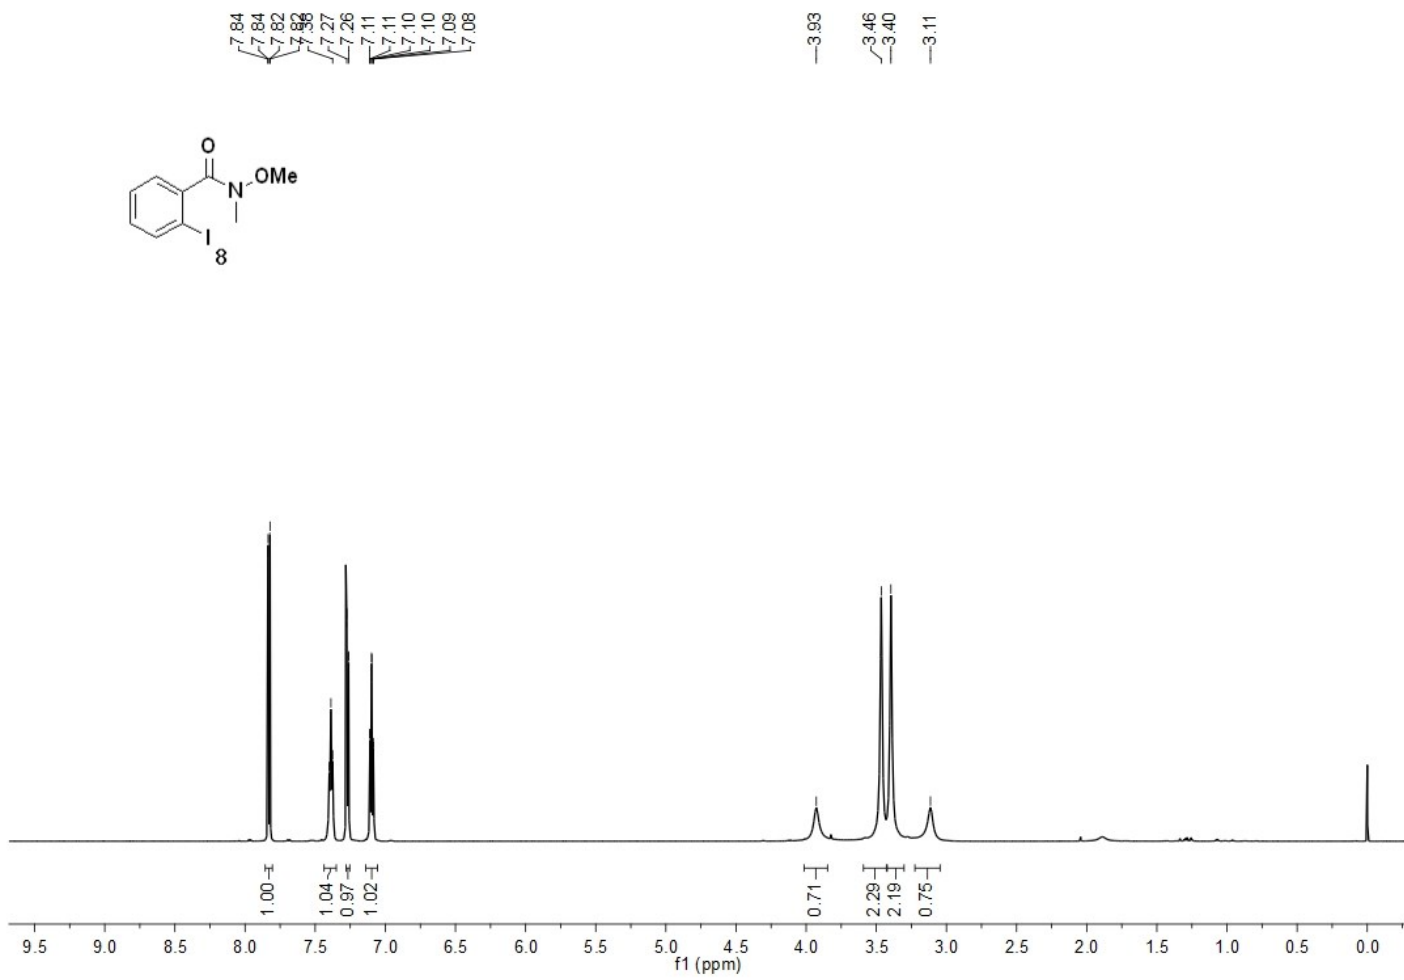

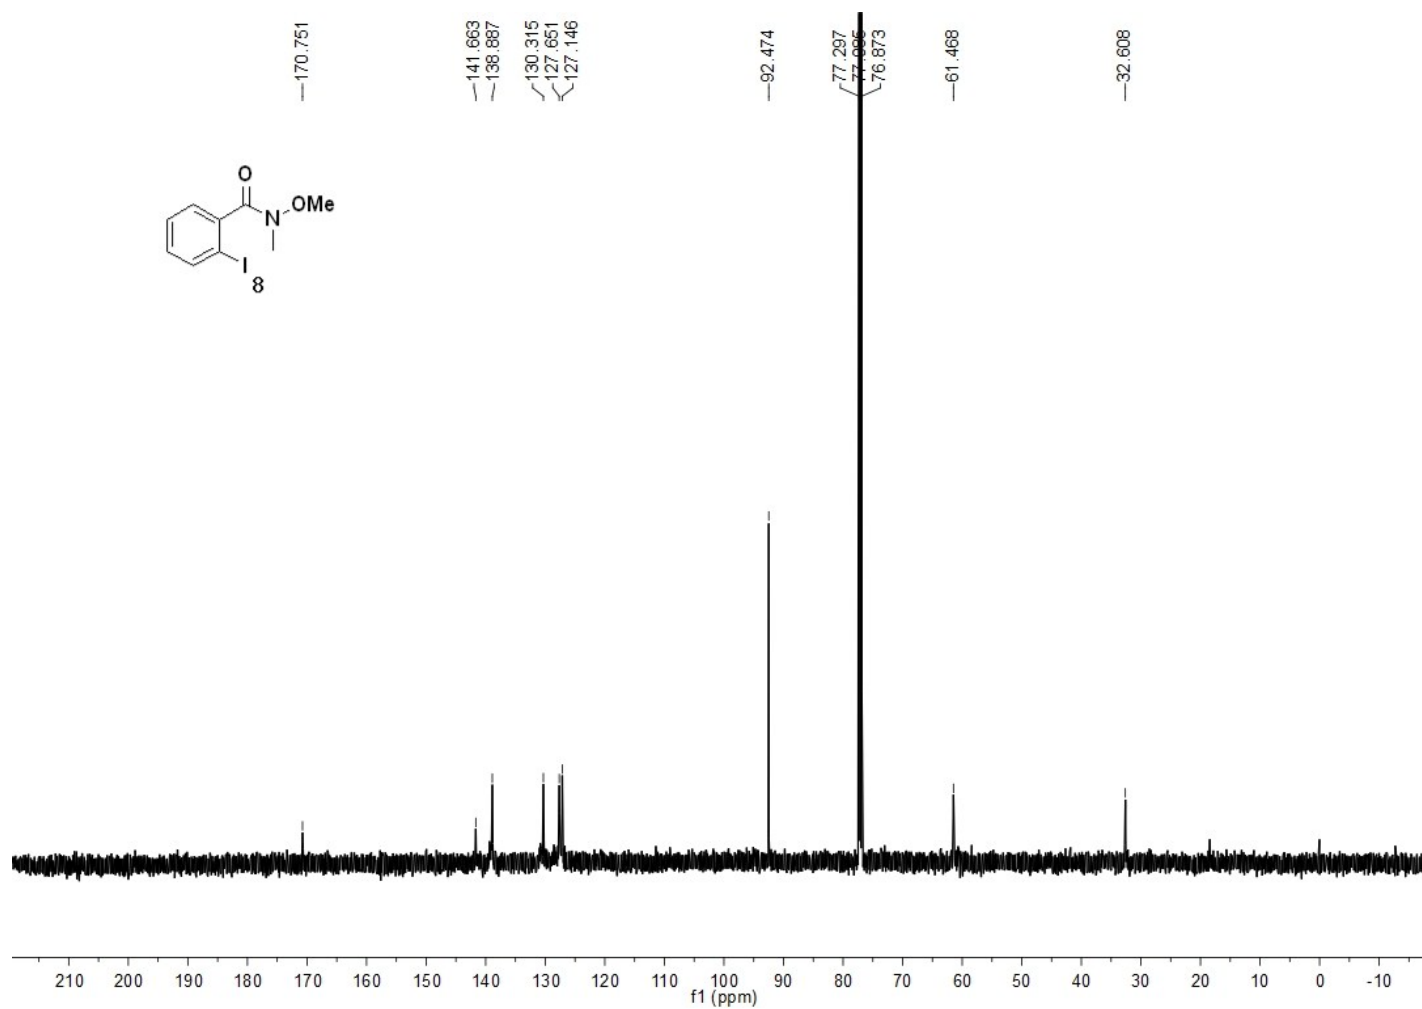

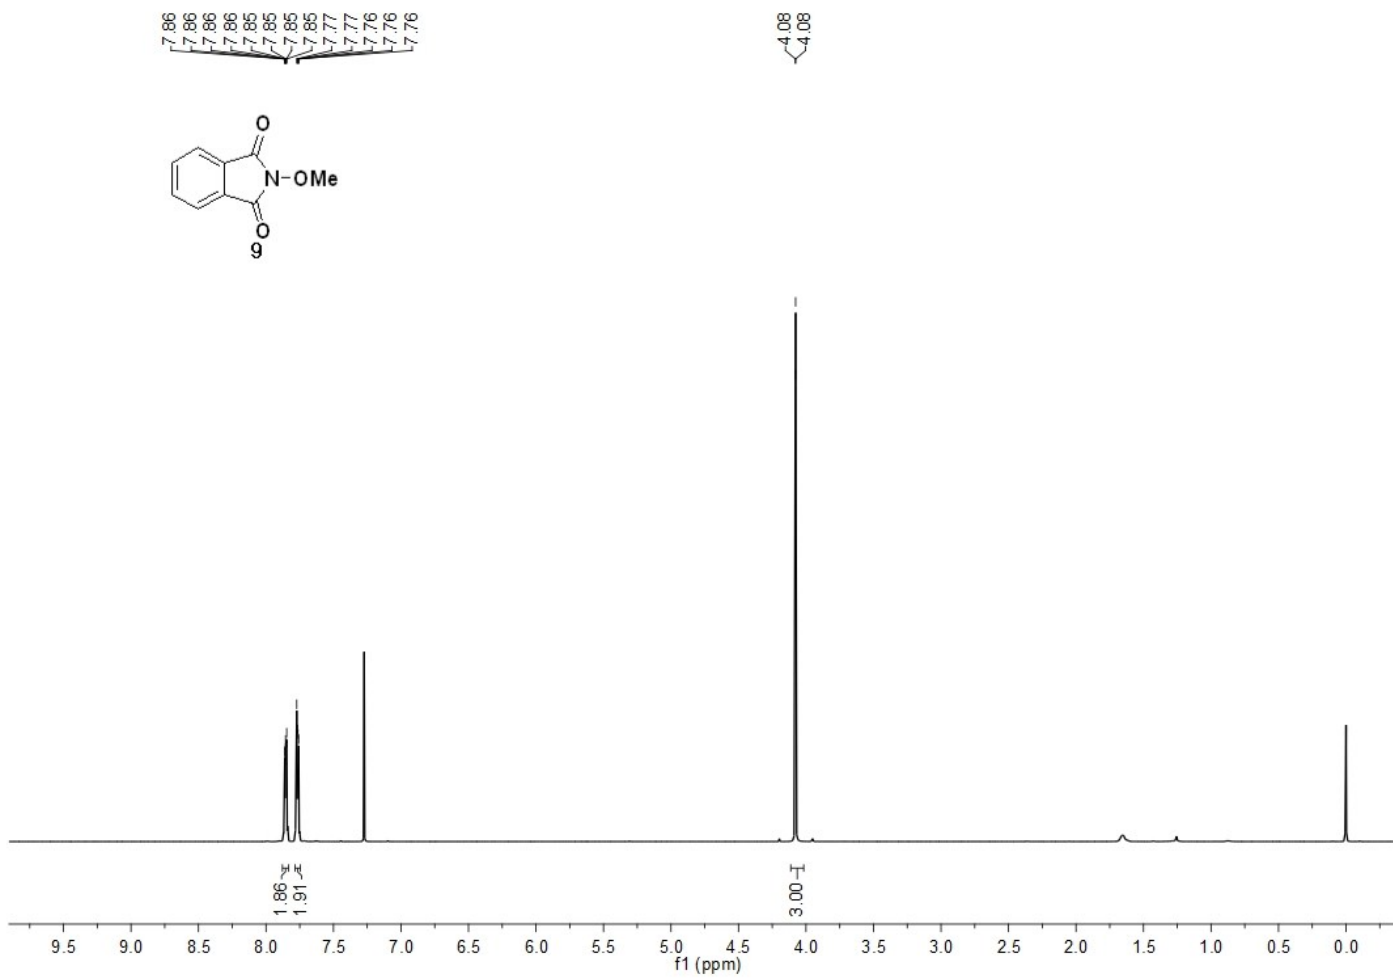

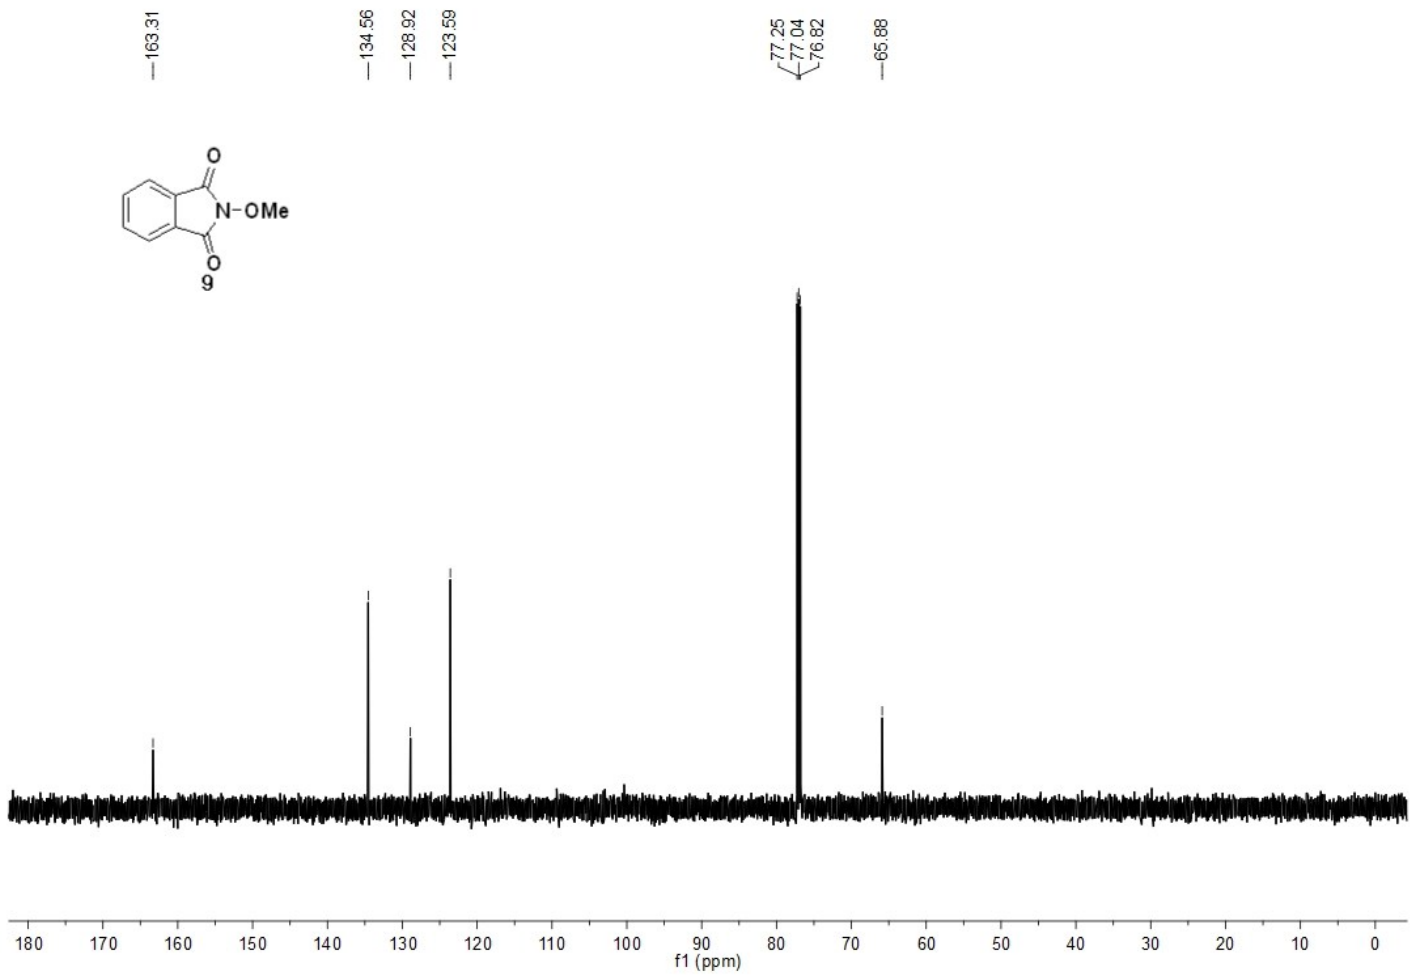

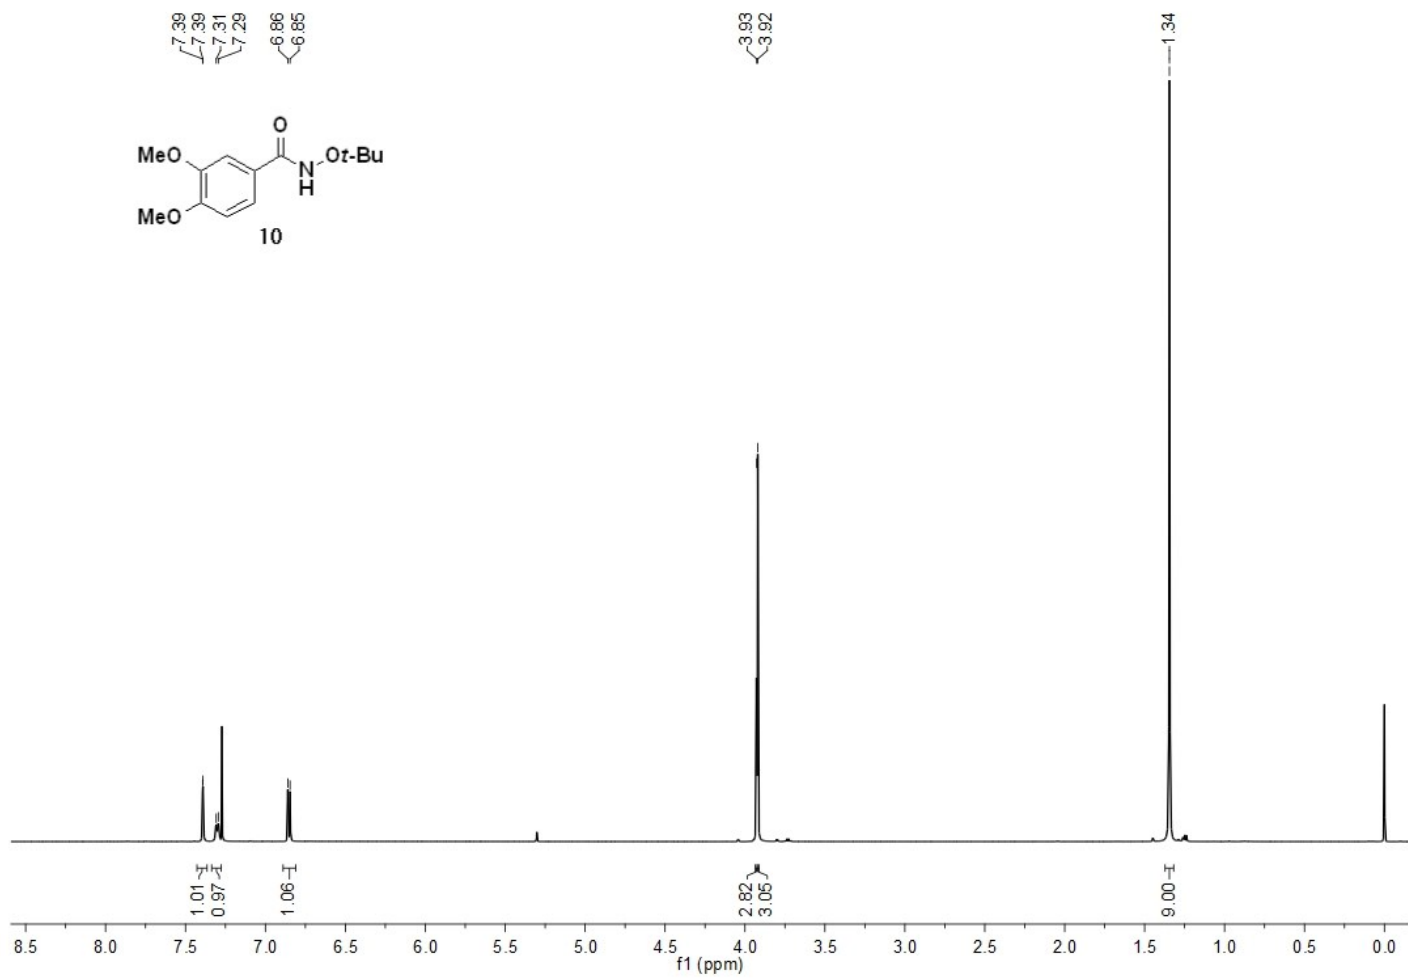

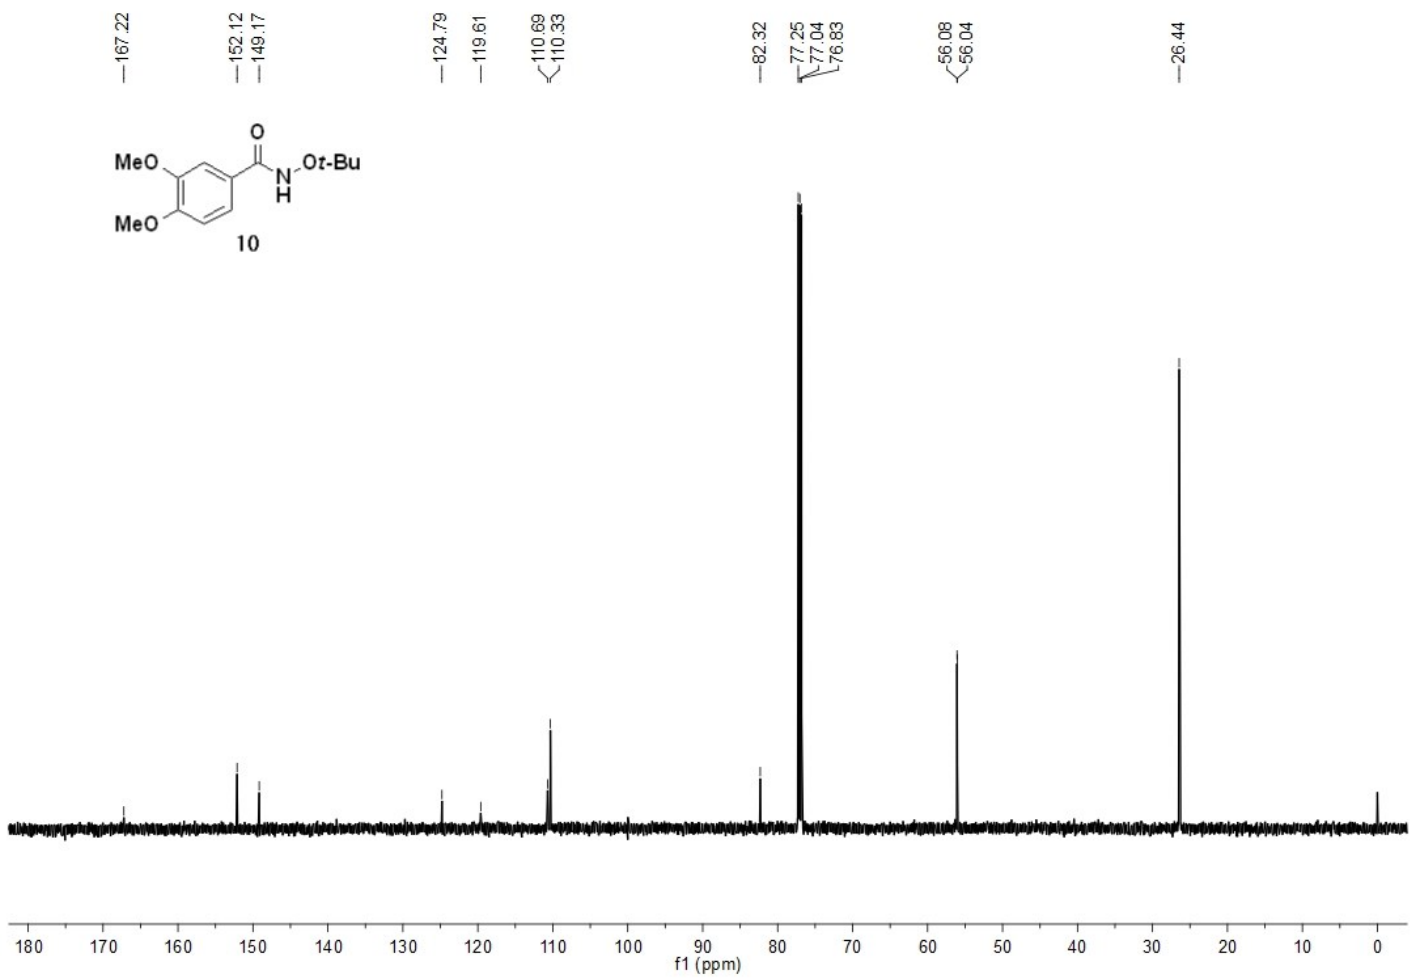



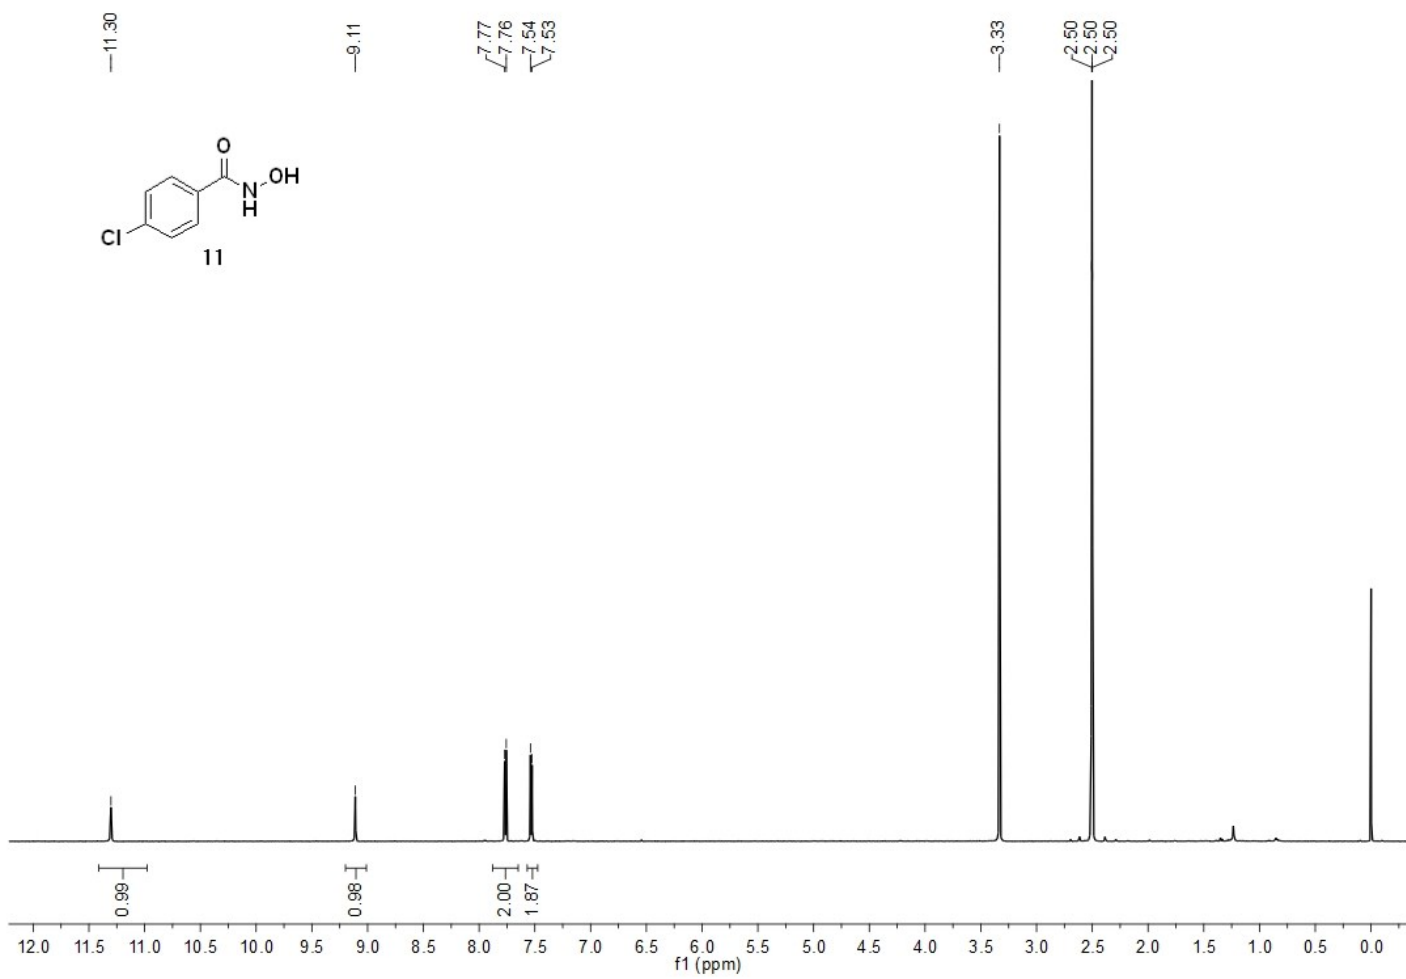

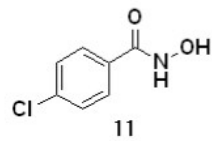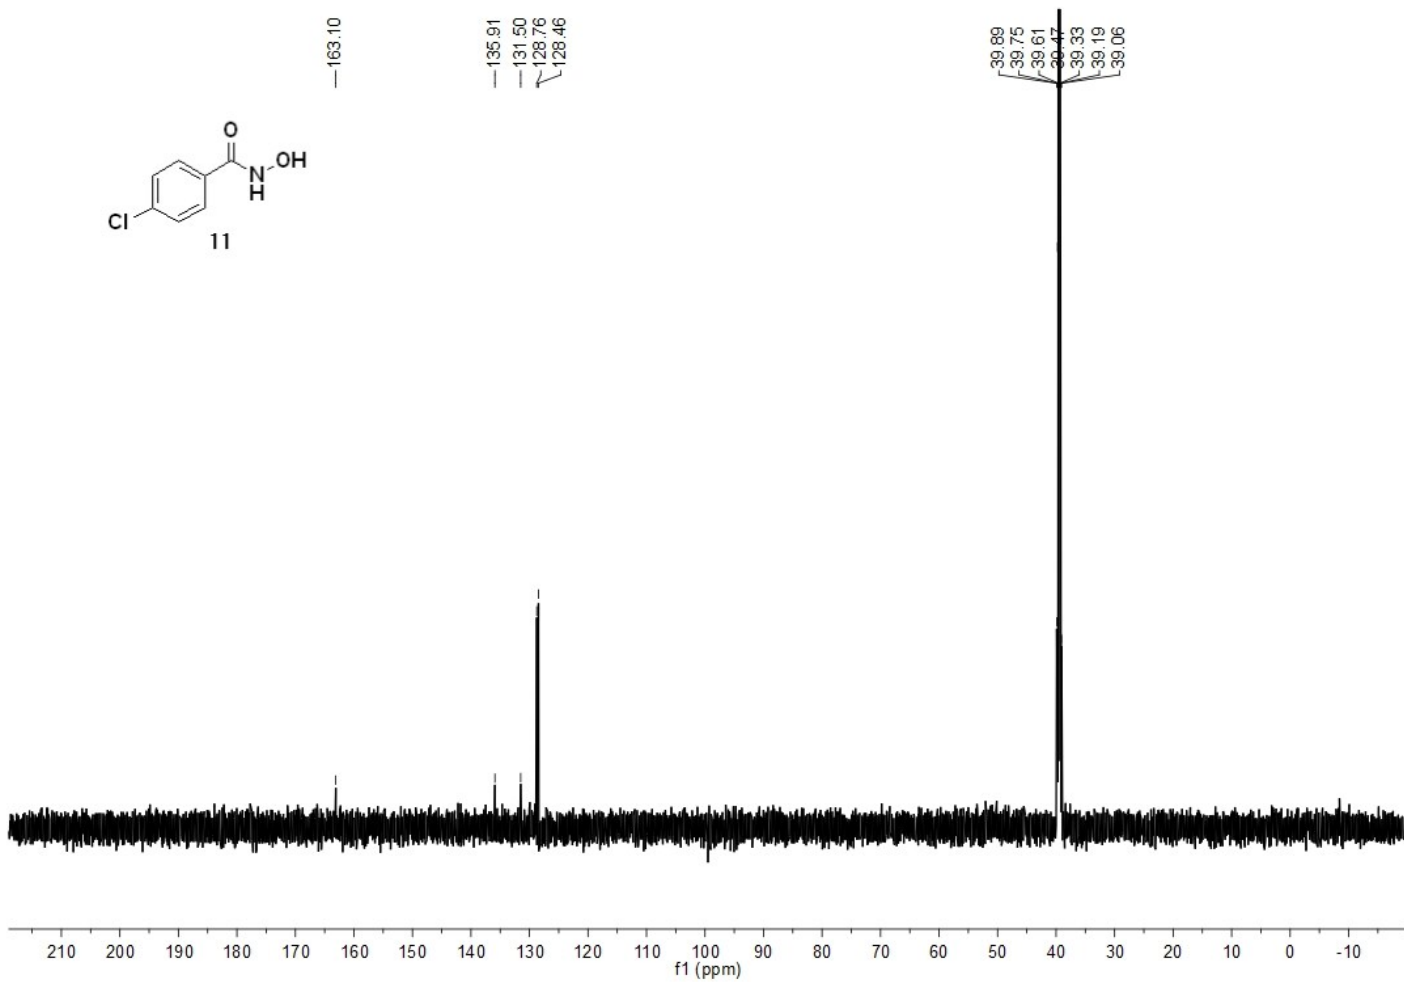

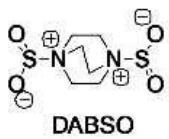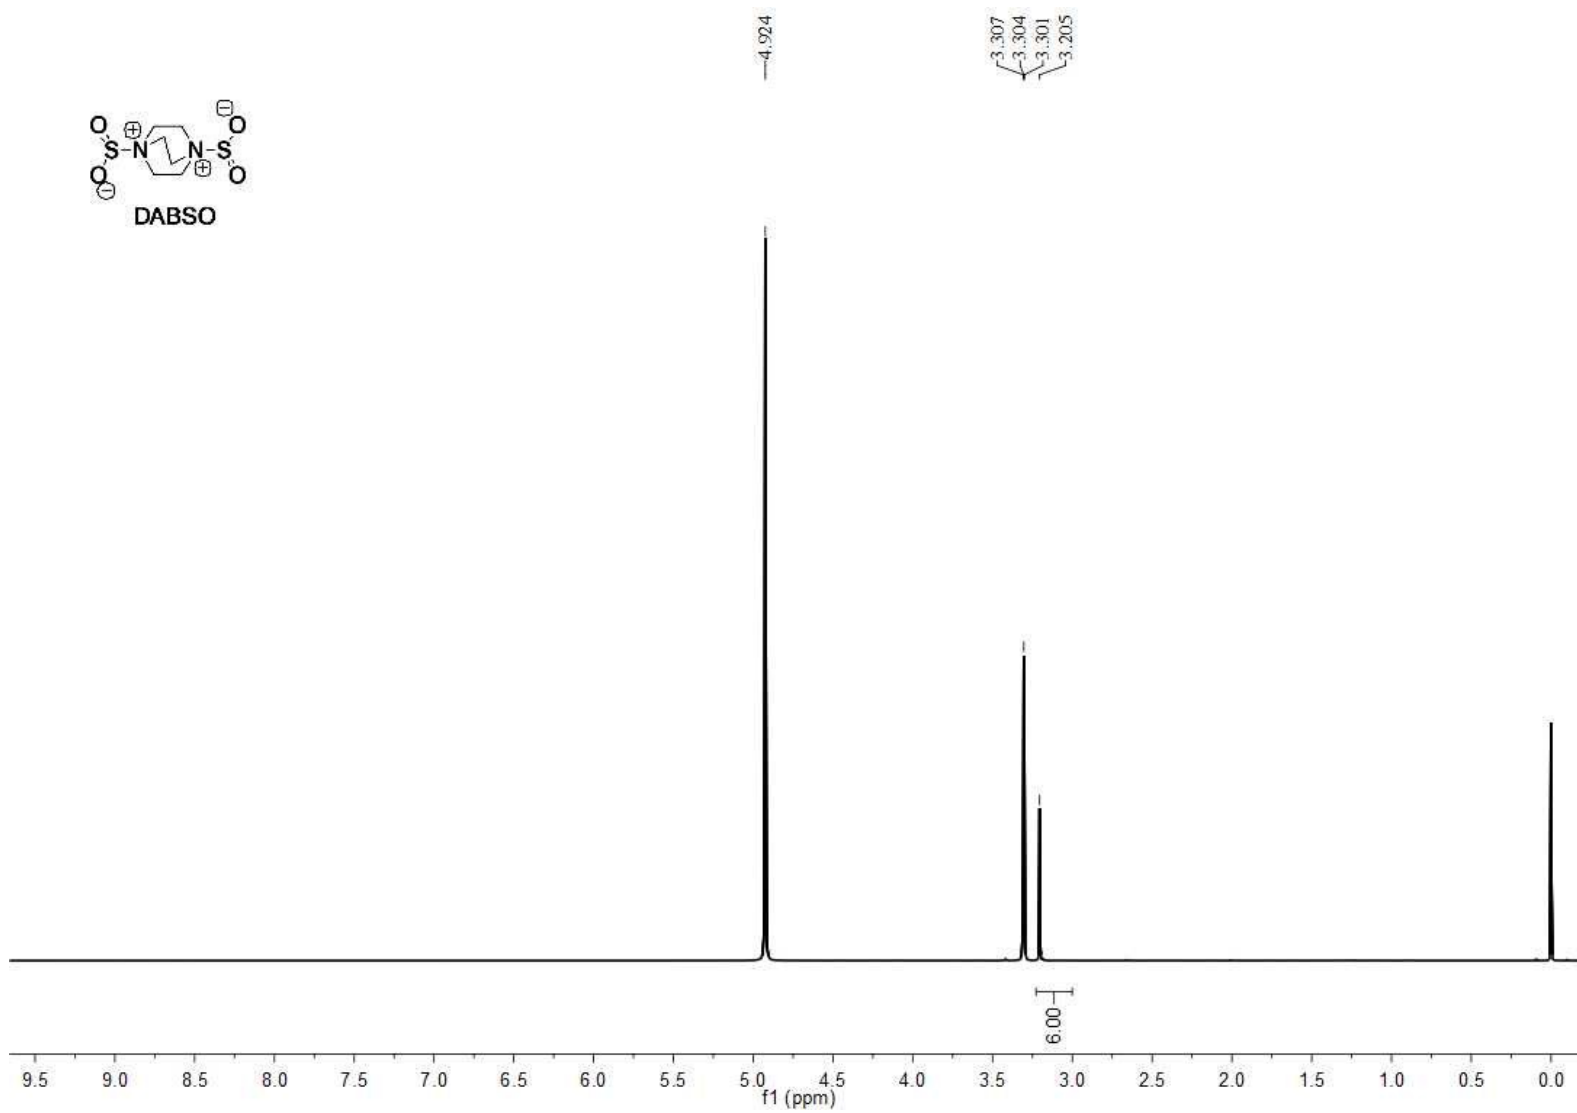

S99

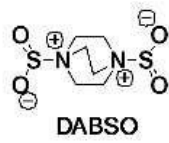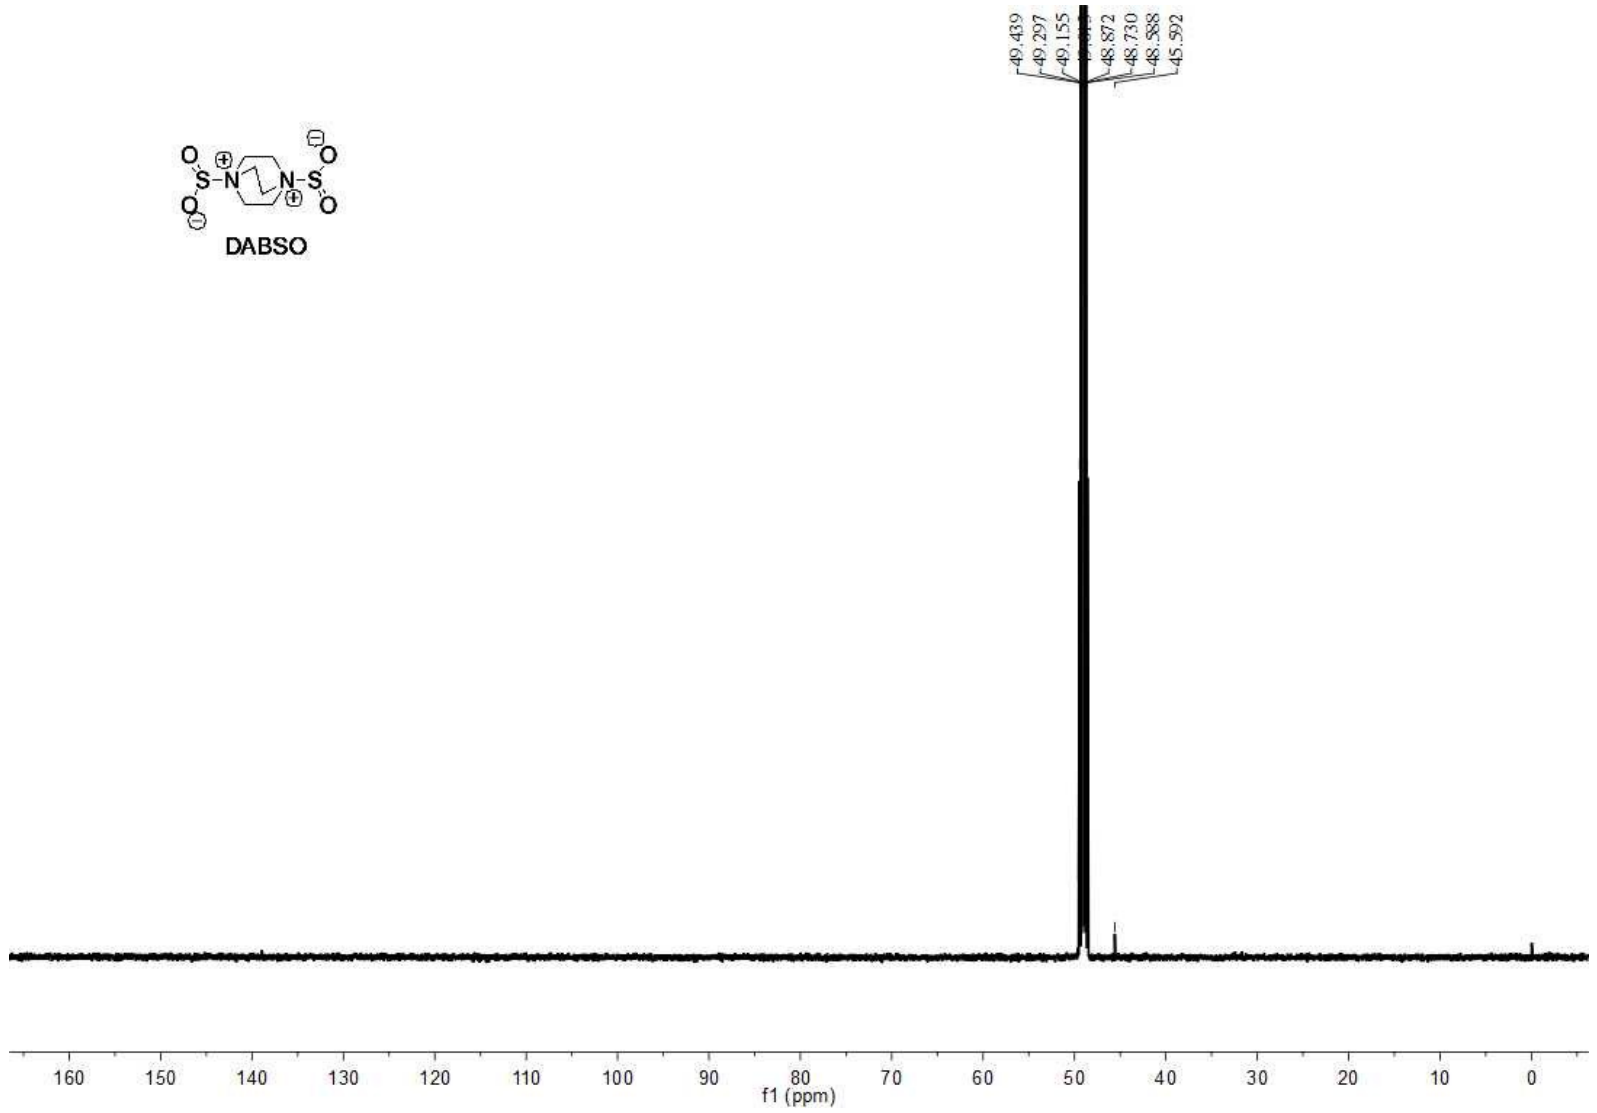

S100

### IR Spectrum of DABSO

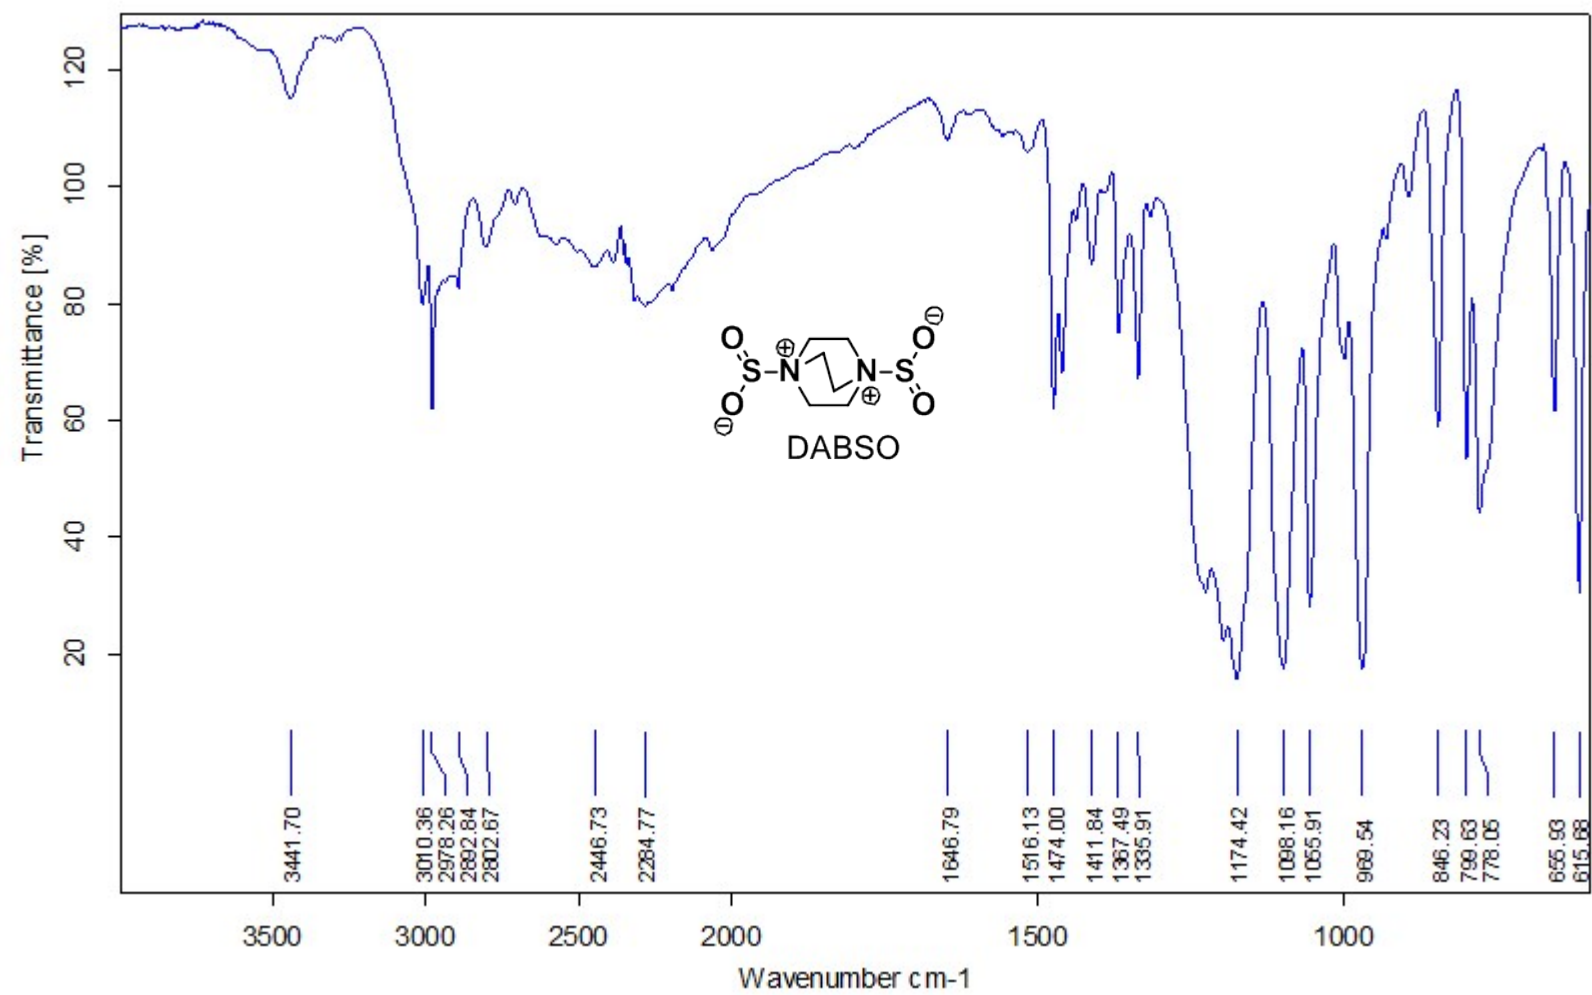

Supplement: c8qo01052h1.pdf [file c8qo01052h1.pdf]
